# Supplementary material
Source: Research Square preprint supplement (doi:10.21203/rs.3.rs-8975516/v1)
Supplement: Supplementary file 1 [file d97afbf66b43ec1bd76d6d1d.xlsx]

## Sheet: S1-Sequencing Stats
Sample-ID	Total bases	Q30 bases	Aligned bases in genome	Total Reads	Aligned reads	% of aligned reads	Mean Coverage	% of 10X
F01-RWGS-23-01-P	180029350844	161110273164	130681455710	1211823468	1196307108	98.7196	43.27	94.51
F01-RWGS-23-02-M	200342071300	180218025002	147386624513	1349239262	1331443105	98.681	48.78	94.03
F01-RWGS-23-03-F	191320926665	171184103099	137536752691	1288246290	1269914216	98.577	45.52	94.52
F02-RWGS-23-04-P	168496995828	149903686771	126536671030	1141304440	1119538273	98.0929	41.89	94.45
F02-RWGS-23-05-M	158969750901	141406575678	119446016075	1074304330	1055191863	98.2209	39.55	93.92
F02-RWGS-23-06-F	218165433984	194834422005	164988994302	1474446886	1448243003	98.2228	54.62	94.67
F03-RWGS-23-07-P	158624362179	141316330222	111189127085	1066552678	1048748487	98.3307	36.79	93.84
F03-RWGS-23-08-M	174210528629	154879994838	122773143703	1171436736	1149686082	98.1432	40.66	94
F03-RWGS-23-09-F	190080216807	170989559410	129505846645	1279024638	1259430552	98.468	42.86	94.51
F04-RWGS-23-10-P	118827715713	105858078164	85980300470	799604844	789998969	98.7987	28.48	93.71
F04-RWGS-23-11-M	131254216237	116495295276	99068934697	882243878	869846725	98.5948	32.78	93.74
F04-RWGS-23-12-F	305082255669	270244366623	224216699802	2053207392	2016951033	98.2342	74.18	94.85
F05-RWGS-23-13-P	224167938220	194614309574	151558655146	1510749810	1482778254	98.1485	50.12	94.52
F05-RWGS-23-14-M	171291795791	150992308130	114341314640	1156448348	1139665434	98.5488	37.82	93.8
F05-RWGS-23-15-F	143552377771	125488443474	96444897981	967560094	952104566	98.4026	31.95	94.14
F06-RWGS-23-16-P	200223558065	178237975718	142533231481	1348727686	1326255627	98.3338	47.14	94.47
F06-RWGS-23-17-M	174495076842	153955828817	123441887135	1174386246	1150023995	97.9255	40.86	93.95
F06-RWGS-23-18-F	163818827100	144347754623	116270388840	1102961168	1079405457	97.8643	38.46	94.35
F07-RWGS-23-19-P	176166161999	158217564892	143740290136	1194271916	1176483136	98.5105	47.55	93.94
F07-RWGS-23-20-M	252941784163	225832514071	205006486987	1704632542	1678855264	98.4878	67.83	94.19
F07-RWGS-23-21-F	127784799340	114013930510	105807743631	861097848	849097019	98.6063	35.01	94.23
F08-RWGS-23-22-P	189704061024	166132036968	152563326837	1276502362	1249183101	97.8598	50.47	94.05
F08-RWGS-23-23-M	188901618729	164458846682	150529776848	1272499826	1242971583	97.6795	49.8	94.07
F08-RWGS-23-24-F	176865312400	154388580552	144437837643	1190183532	1164230331	97.8194	47.79	94.54
F09-RWGS-23-25-P	135927019129	119241353224	115287237799	915219890	904083255	98.7832	38.14	94.28
F09-RWGS-23-26-F	184296225815	162524258675	153421775873	1243300606	1227428223	98.7234	50.77	94.54
F09-RWGS-23-27-M	180746076079	156654228197	152041262698	1216446430	1198588886	98.532	50.28	93.98
F10-RWGS-23-28-P	111721729097	98743727849	94426297523	750624316	740994814	98.7171	31.24	93.9
F10-RWGS-23-29-M	239849990616	208043516710	199195849372	1612634698	1581723765	98.0832	65.88	94.18
F10-RWGS-23-30-F	184476609680	160756651511	154129547821	1238449386	1217405598	98.3008	51.01	94.64
F11-RWGS-23-31-P	175848435453	155648896843	144202874936	1183408730	1165299020	98.4697	47.74	94.59
F11-RWGS-23-32-M	169860718778	149460581492	141224307426	1141437898	1121917321	98.2898	46.76	94.05
F11-RWGS-23-33-F	205209468378	181006739864	166365487369	1379447936	1355974774	98.2984	55.05	94.65
F12-RWGS-23-34-P	142758590551	125113789303	117750365828	965817396	950634557	98.428	38.98	93.97
F12-RWGS-23-35-M	156580086678	138234879977	128124054112	1056284344	1041820961	98.6307	42.4	93.98
F12-RWGS-23-36-F	259736972893	235432033813	205372805839	1803480520	1780212866	98.7098	67.92	94.5
F13-RWGS-23-37-P	220813969775	196127226993	159165378914	1487562182	1464098021	98.4226	52.65	94.61
F13-RWGS-23-38-M	175366304946	154592922361	130446111850	1180120984	1159513138	98.2538	43.17	94.02
F13-RWGS-23-39-F	132646316136	117552444097	96717488760	892303632	878739072	98.4798	32.02	94.17
F14-RWGS-23-40-P	209168996674	184928468853	159948196141	1409294066	1381060931	97.9966	52.96	94.66
F14-RWGS-23-41-M	147690711120	131094808551	114655078463	995351024	975890075	98.0448	37.94	93.86
F14-RWGS-23-42-F	175207224991	155736132295	133376332013	1180897120	1158188496	98.077	44.14	94.52
F15-RWGS-23-43-P	186806114324	163196993836	149665795307	1258786746	1236743533	98.2489	49.53	94.56
F15-RWGS-23-44-M	183241042793	160017985989	150344204526	1234107232	1213680625	98.3448	49.73	94.02
F15-RWGS-23-45-F	185620422048	161539643797	150902665574	1249960402	1227294458	98.1867	49.96	94.65
F16-RWGS-23-46-P	174121344071	154970312394	145383538469	1174062952	1155525423	98.4211	48.13	94.03
F16-RWGS-23-47-M	181154072336	159577541329	149779745879	1221232536	1198844802	98.1668	49.57	94.05
F16-RWGS-23-48-F	202563861595	179716748205	167385581851	1365124922	1342346660	98.3314	55.4	94.7
F17-RWGS-23-49-P	190751602152	168237889750	158494583845	1285245608	1265603919	98.4718	52.42	94.01
F17-RWGS-23-50-M	176887161526	156046216337	145253283342	1191439200	1172827914	98.4379	48.06	94.02
F17-RWGS-23-51-F	156833765742	137670837795	130410974735	1056572180	1039542372	98.3882	43.2	94.58
F18-RWGS-23-52-P	161837027876	139197171428	123168814148	1089815104	1048705474	96.2278	40.76	94.29
F18-RWGS-23-53-F	180951033950	156123573386	133181410174	1219266700	1174647054	96.3405	44.08	94.35
F18-RWGS-23-54-M	182015996887	158476861540	138727317326	1226582012	1183264269	96.4684	45.92	93.84
F19-RWGS-23-55-P	169275733783	149026316416	139498377266	1140930190	1099519511	96.3704	46.18	93.89
F19-RWGS-23-56-F	185663685967	163197986760	150759530422	1250767002	1201439392	96.0562	49.89	94.44
F19-RWGS-23-57-M	201910700130	176803400344	165201805687	1360411008	1309864039	96.2844	54.62	93.84
F20-RWGS-23-58-P	156922542270	137862498585	124255824553	1057873272	1015653412	96.009	41.15	93.8
F20-RWGS-23-59-F	135669742679	118632160832	105599712573	914386796	874124471	95.5968	34.96	94.15
F20-RWGS-23-60-M	149130235470	131254443092	120887230942	1006696506	968854592	96.241	40.01	93.69
F21-RWGS-23-61-P	165969017905	145633579569	128286983387	1118057696	1074030561	96.0622	42.49	94.34
F21-RWGS-23-62-F	153748471530	135124961738	116242517022	1040146512	995355850	95.6938	38.5	94.24
F21-RWGS-23-63-M	161828174090	142804621814	124797380490	1090910132	1050024380	96.2521	41.33	93.85
F22-RWGS-24-01-P	191924285151	168892490027	158256384511	1293639920	1245771265	96.2997	52.38	93.91
F22-RWGS-24-02-M	165318035520	144690088943	137737637668	1115135100	1073272234	96.2459	45.58	93.78
F22-RWGS-24-03-F	178065641687	157858388500	144543616072	1200803486	1156809210	96.3363	47.86	94.37
F23-RWGS-24-04-P	86313637789	76348408301	1173581897	581041674	557380237	95.9278	25.43	96.93
F23-RWGS-24-05-F	192678645026	170749421339	149231974640	1298412214	1246644596	96.013	49.4	94.46
F23-RWGS-24-06-M	243854133578	215871162304	188207525024	1645023888	1583818706	96.2794	62.31	94.03
F24-RWGS-24-07-P	203898741061	180659656063	166091012702	1372258644	1322300369	96.3594	54.93	94.41
F25-RWGS-24-08-M	170439651943	151341505976	140612517364	1148697334	1109952168	96.627	46.5	93.72
F26-RWGS-24-09-F	175507826812	155461797300	145083638232	1181839228	1138013604	96.2917	48.01	94.35
F25-RWGS-24-10-P	194714769962	173126984603	158666992989	1311425738	1267539286	96.6535	52.54	93.88
F25-RWGS-24-11-M	180121747701	158446103909	145081899435	1213392158	1167466187	96.2151	48.03	93.86
F25-RWGS-24-12-F	173036492863	153058584920	141923128468	1165002586	1122135826	96.3205	47	94.39
F26-RWGS-24-13-P	186796512215	166626762002	156628387100	1257067908	1214654233	96.626	51.84	94.38
F26-RWGS-24-14-M	193184208541	171950932119	162310155519	1300279950	1258819633	96.8114	53.72	93.85
F26-RWGS-24-15-F	162565725445	144571354828	135546192665	1093827400	1054440191	96.3991	44.85	94.29
F27-RWGS-24-16-P	166067256657	144529746415	136283515801	1118177492	1077916502	96.3994	45.1	93.83
F27-RWGS-24-17-F	196409138781	171057384723	159233338441	1324465816	1271517393	96.0023	52.69	94.41
F27-RWGS-24-18-M	172936675148	150649745640	141410823307	1164994764	1121283008	96.2479	46.8	93.87
F29-RWGS-24-21-P	212039243812	189373768841	172035964107	1428440662	1381788483	96.734	56.94	94.46
F29-RWGS-24-22-F	184721868272	163159370010	149636750460	1243428574	1199749919	96.4872	49.54	94.42
F29-RWGS-24-23-M	155940776388	138032862420	127285029472	1049317006	1017671828	96.9842	42.13	93.79
F30-RWGS-24-24-P	163722116679	147120383156	136321170190	1106130274	1071629047	96.8809	45.15	93.75
F30-RWGS-24-25-F	169484877946	152660913913	141188454887	1144264186	1107913974	96.8233	46.73	94.27
F30-RWGS-24-26-M	160068760341	142603193298	134775059655	1078240688	1044231032	96.8458	44.61	93.74
F31-RWGS-24-27-F	170182635006	155112405127	140076901436	1146942150	1112873917	97.0296	46.37	94.33
F31-RWGS-24-28-M	187003777523	170676538036	154983041194	1262061972	1226060618	97.1474	51.33	93.87
F31-RWGS-24-29-P	189753147345	172861993916	157571526772	1279297414	1242113941	97.0934	52.19	93.94
F32-RWGS-24-30-P	185053367019	169144580548	141723857231	1245093468	1208698570	97.0769	46.91	93.84
F32-RWGS-24-31-M	191311189558	174011619271	153180291076	1286229362	1247914039	97.0211	50.69	93.89
F32-RWGS-24-32-F	190752314552	173033320206	150208156901	1282472526	1239619600	96.6586	49.68	94.33
F33-RWGS-24-33-P	173970274315	158685897222	140042223380	1170821604	1137544073	97.1578	46.35	93.83
F33-RWGS-24-34-M	219467428795	200507596674	175779147886	1476706554	1437039665	97.3138	58.16	93.92
F33-RWGS-24-35-F	160072859231	144567299779	126745323866	1075840568	1043168580	96.9631	42	94.4
F34-RWGS-24-36-F	203373779216	181757222766	163193256373	1370694978	1326724343	96.7921	54.03	94.41
F34-RWGS-24-37-M	124842975353	111840748894	102832740047	841483456	821293743	97.6007	34.04	93.51
F34-RWGS-24-38-P	215872098968	193218111058	173305461639	1456039896	1410653629	96.8829	57.37	93.89
F35-RWGS-24-39-P	194924758307	178289750502	151841318885	1310643466	1270437647	96.9324	50.24	94.38
F35-RWGS-24-40-M	207732451825	189910530032	163790758501	1398737882	1357674490	97.0643	54.16	93.83
F35-RWGS-24-41-F	155231381068	141707122520	120629814608	1046527312	1012483681	96.747	39.93	94.23
F36-RGWS-24-44-P	225369789279	206138299166	170477365818	1518533640	1471574964	96.9076	56.44	93.93
F36-RWGS-24-42-M	191621011867	174084203302	145241416624	1291139744	1250487372	96.8514	48.09	93.86
F36-RWGS-24-43-F	157869481651	143595628955	117179354592	1063287414	1027510774	96.6353	38.81	94.24
F37-RGWS-24-45-P	166234997224	152803348457	128834802115	1120969518	1087283292	96.9949	42.65	93.72
F37-RGWS-24-46-M	205207999544	186509207297	159631179997	1382079878	1337237405	96.7554	52.79	93.82
F37-RGWS-24-47-F	176408736174	161704492105	134088407987	1190213264	1147497050	96.411	44.37	94.26
F38-RGWS-24-48-P	191011678382	173771122312	136780113120	1288195102	1248376016	96.9089	45.27	94.34
F38-RGWS-24-49-F	152446996962	138605493653	111968901149	1027471464	995130125	96.8523	37.08	94.17
F38-RGWS-24-50-M	164315674294	150087032447	120845846395	1108259426	1076310495	97.1172	39.99	93.71
F39-RWGS-24-51-F	206621943994	188715476544	159451070197	1393399784	1348007472	96.7423	52.74	94.36
F39-RWGS-24-52-M	164550000990	150709277907	128222126881	1109438596	1080724016	97.4118	42.44	93.75
F39-RWGS-24-53-P	195324302156	178831735676	149592115034	1317095886	1276674326	96.931	49.52	94.41
F40-RWGS-24-54-P	234316230175	213461279965	187498522774	1578266196	1528355155	96.8376	62.04	94.52
F40-RWGS-24-55-M	161357506870	146581633738	130494009587	1086582324	1054168660	97.0169	43.18	93.76
F40-RWGS-24-56-F	175223038929	158875480574	140957466538	1180107276	1140876872	96.6757	46.7	94.46
F41-RWGS-24-57-P	171984418515	155837306600	136689488259	1158587996	1121520956	96.8007	45.24	93.74
F41-RWGS-24-58-M	178059971494	161592046822	140156924607	1199498786	1164259197	97.0621	46.4	93.83
F41-RWGS-24-59-F	184271665904	167273313048	147111940923	1241198102	1198020407	96.5213	48.69	94.34
F42-RWGS-24-60-P	211463150695	194615727931	162178556537	1425455252	1384034546	97.0942	53.71	93.96
F42-RWGS-24-61-M	140370665032	128529453887	106690275940	945596998	916521226	96.9251	35.33	93.67
F42-RWGS-24-62-F	196532818413	180498204190	153898431560	1325304366	1286034381	97.0369	50.97	94.43
F43-RWGS-24-63-P	246029730549	226485505424	190899992057	1656315024	1610534381	97.236	63.16	94.53
F43-RWGS-24-64-F	155975006791	143484638544	120756734077	1049867688	1018399984	97.0027	39.98	94.24
F43-RWGS-24-65-M	169763473467	155887347406	132818847358	1143051492	1110869141	97.1845	43.97	93.75
F44-RWGS-24-66-P	191666862413	172382769237	144988040328	1290199594	1244343949	96.4458	48.01	94.37
F44-RWGS-24-67-F	172439907994	153449390473	129992163195	1160470770	1119282693	96.4507	43.04	94.32
F44-RWGS-24-68-M	172893253859	154345623185	132920010008	1162625442	1124443830	96.7159	43.99	93.73
F45-RWGS-24-69-P	198196692482	180273165280	162692489545	1336059660	1298623388	97.198	53.88	93.95
F45-RWGS-24-70-F	168241510893	153023043614	138198755168	1131911446	1098875241	97.0814	45.75	94.35
F45-RWGS-24-71-M	180193149549	163863876361	146612059725	1212856492	1178428190	97.1614	48.54	93.88
F47-RWGS-24-75-P	195383631435	171445724554	119764636823	1320490110	1273911729	96.4726	39.66	94.27
F47-RWGS-24-76-F	120689859580	106223142119	74811110684	814443194	786751580	96.5999	24.79	93.06
F47-RWGS-24-77-M	178509205342	157345982567	108490053236	1205263952	1169775818	97.0556	35.92	93.6
F48-RWGS-24-78-P	277025386895	251757715941	221528417284	1866950480	1802500476	96.5478	73.3	94.58
F48-RWGS-24-79-F	201661010162	183210605620	164681111821	1358666176	1312904056	96.6318	54.52	94.45
F48-RWGS-24-80-M	91523504778	83265603736	1316136561	616551574	598005789	96.992	28.52	97.82
F49-RWGS-24-81-P	166071850430	150858183717	123773181380	1117304290	1080042823	96.6651	40.95	94.24
F49-RWGS-24-82-M	166055500053	151100532739	124302185423	1117534510	1083413428	96.9468	41.15	93.81
F49-RWGS-24-83-F	203241096586	185734059188	148758044074	1367782100	1324034193	96.8015	49.24	94.41
F50-RWGS-24-84-P	181085901011	161284873238	149578428171	1219843696	1177875177	96.5595	49.54	94.46
F50-RWGS-24-85-M	130541111196	114915048476	111197146666	879384542	851865615	96.8707	36.82	93.67
F50-RWGS-24-86-F	184455908051	163837224251	154694980451	1241627946	1199968543	96.6448	51.2	94.45
F51-RWGS-24-87-P	217322479839	191274344064	169750721884	1467722688	1426455382	97.1883	56.2	93.94
F51-RWGS-24-88-M	133601771525	116591724688	104403610858	900279500	874719688	97.1609	34.57	93.61
F51-RWGS-24-89-F	177955248191	156063214392	139890245593	1198214112	1164176801	97.1593	46.33	94.42
F52-RWGS-24-90-P	118505701172	105290388731	64542960818	890491896	865927305	97.2415	21.38	92.73
F52-RWGS-24-91-M	242121850458	215922506515	126028119186	1819437884	1770886077	97.3315	41.7	93.66
F52-RWGS-24-92-F	136551252708	121219051108	74930312412	1025276092	993658696	96.9162	24.8	92.9
F53-RWGS-24-93-P	196077921046	177338195858	155774104129	1320331366	1272352447	96.3661	51.59	94.46
F53-RWGS-24-94-M	193926757858	176482356965	150114509298	1314638394	1272239628	96.7749	49.67	93.76
F53-RWGS-24-95-F	187228715857	170427383110	148282589973	1265043224	1223099380	96.6844	49.07	94.36
F54-RWGS-24-96-P	216764954732	197604065138	173453012554	1460010956	1412443150	96.742	57.42	93.99
F54-RWGS-24-97-M	179132258830	163355312253	143115805752	1206163770	1165794227	96.6531	47.37	93.87
F54-RWGS-24-98-F	177290522939	161758785528	141199865254	1193867016	1156195624	96.8446	46.73	94.42
F55-RWGS-24-100-M	162596292123	148380612806	123780336841	1095878018	1064020946	97.093	40.98	93.69
F55-RWGS-24-101-F	168210974413	153435592826	134689187597	1134046108	1098791959	96.8913	44.6	94.35
F55-RWGS-24-99-P	258562271925	237231167676	198476063367	1743518600	1695084793	97.2221	65.68	93.96
F56-RWGS-24-102-P	230908773445	212143514562	179347774838	1556025582	1514373270	97.3232	59.36	93.97
F56-RWGS-24-103-M	153994245977	141529224573	119315742992	1038551822	1010803872	97.3282	39.54	93.84
F56-RWGS-24-104-F	193945809260	178954737118	147714029061	1308248896	1266756840	96.8284	48.91	94.36
F57-RWGS-24-105-P	174010167126	156712007341	141221516279	1173314080	1133854507	96.6369	46.79	93.88
F57-RWGS-24-106-M	183393815976	165081040338	150046447979	1237126694	1193878550	96.5041	49.65	93.77
F57-RWGS-24-107-F	221407804519	200069101276	173770011953	1494858574	1440338722	96.3528	57.58	94.55
F58-RWGS-24-108-P	220338916986	202582498533	168496594174	1474815876	1437828802	97.4921	55.79	93.95
F58-RWGS-24-109-M	176622386954	162755071075	135217095659	1183131618	1154746253	97.6008	44.79	93.81
F58-RWGS-24-110-F	187814956207	172535216072	141843377039	1256441632	1221282779	97.2017	46.95	94.4
F59-RWGS-24-111-P	252051896948	231593010379	190136797967	1699176616	1647645336	96.9673	62.92	93.96
F59-RWGS-24-112-F	183842559070	169341033065	139580031439	1239082742	1198350156	96.7127	46.2	94.33
F59-RWGS-24-113-M	146079399063	134237615990	114811006288	983573152	956524679	97.25	38.01	93.74
F60-RWGS-24-114-P	240765610859	220224097667	177367211105	1623837802	1574615166	96.9687	58.7	93.99
F60-RWGS-24-115-M	160681565906	147080722779	120101397298	1083072368	1049544530	96.9044	39.75	93.75
F60-RWGS-24-116-F	151436104315	138495580972	113564667479	1020883720	986391133	96.6213	37.57	94.18
F61-RWGS-24-117-P	121438768943	110054469110	87712517402	818214550	790750363	96.6434	29.03	93.44
F61-RWGS-24-118-M	112118813614	101031342127	80313508030	755376872	729362039	96.556	26.59	93.37
F61-RWGS-24-119-F	124589609783	112505990155	92505604572	839148536	809678419	96.4881	30.63	93.87
F62-RWGS-24-120-P	195393422742	178725358841	147493178920	1316811232	1272270991	96.6176	48.82	94.37
F62-RWGS-24-121-M	182898594076	167157486388	136890157633	1233398838	1190086511	96.4884	45.31	94.34
F62-RWGS-24-122-F	202805225724	185545150115	151638177345	1367502274	1324551289	96.8592	50.17	93.81
F63-RWGS-24-123-P	154994563496	141503323789	114170677445	1042460158	1009769408	96.8641	37.83	94.25
F63-RWGS-24-124-F	170559182961	155592758157	125924172461	1147191196	1111773695	96.9127	41.7	94.31
F63-RWGS-24-125-M	128820782779	117436368539	94614533372	866056450	841655673	97.1825	31.31	93.48
F64-RWGS-24-127-M	130071066224	113434937874	86218320632	875201480	852243614	97.3768	28.55	93.45
F64-RWGS-24-128-F	106793720782	92530630169	75809848883	718591706	696966029	96.9905	25.12	93.17
F64-RWGS-24-126-P	129034071052	112604231867	91633727831	868456104	841648639	96.9132	30.34	93.83
F65-RWGS-24-129-P	165417536226	150074249726	123132959110	1110970692	1074252203	96.6949	40.75	94.26
F65-RWGS-24-130-M	209278263480	189816054667	155325989007	1407604364	1364194674	96.9161	51.4	93.88
F65-RWGS-24-131-F	174752088272	156219771503	127158886162	1174166624	1132892976	96.4849	42.11	94.33
F66-RWGS-24-132-P	193175287961	175984439494	143859115487	1301069012	1258952401	96.7629	47.6	93.82
F66-RWGS-24-133-M	182598252042	166937216454	134690175379	1229760160	1189826650	96.7527	44.56	93.74
F66-RWGS-24-134-F	190884453637	174792865408	139869314745	1286506420	1243382587	96.648	46.29	94.35
F67-RWGS-24-135-P	150639150482	137223022228	118426090581	1012831372	983059523	97.0605	39.2	94.23
F67-RWGS-24-136-M	189299315448	172062947559	150474879245	1274819304	1236582718	97.0006	49.79	93.85
F67-RWGS-24-137-F	216661415897	196678376209	169380180234	1459287044	1412232405	96.7755	56.06	94.49
F68-RWGS-24-138-P	173630365269	155746901680	133523392444	1168641640	1123670413	96.1518	44.22	94.4
F68-RWGS-24-139-M	189784467619	171141335446	145232213017	1278362820	1234727413	96.5866	48.1	93.93
F68-RWGS-24-140-F	210296551087	190890841822	162183460677	1415693562	1367445414	96.5919	53.65	94.41
F69-RWGS-24-141-P	201942531954	184053486054	149038901603	1362068624	1317620455	96.7367	49.36	94.45
F69-RWGS-24-142-M	194286642811	175098170399	145560973573	1308951388	1265931321	96.7134	48.17	93.85
F69-RWGS-24-143-F	158544472237	144338110582	115183076630	1069335520	1033343586	96.6342	38.15	94.19
F70-RWGS-24-144-P	229983618883	209766228707	167507460542	1547322090	1496899137	96.7413	55.44	94.51
F70-RWGS-24-145-M	145422231422	132506990264	110852400808	977793730	947026046	96.8534	36.72	93.73
F70-RWGS-24-146-F	188777165070	171850901956	142222077603	1270677576	1227099719	96.5705	47.08	94.39
F71-RWGS-24-147-P	216570256897	195580000181	163741527063	1457608334	1406151207	96.4698	54.18	94.44
F71-RWGS-24-148-M	178968203361	162449195655	135307844678	1205124640	1168053372	96.9239	44.81	93.86
F71-RWGS-24-149-F	172081042120	156229829323	128362578106	1158845742	1117823226	96.4601	42.46	94.23
F72-RWGS-24-150-P	231804430255	210571205369	168593643142	1557174812	1509556684	96.942	55.8	94.51
F72-RWGS-24-151-M	172168617269	155345406795	125713021240	1156054676	1117634253	96.6766	41.58	93.72
F72-RWGS-24-152-F	156163406132	140716400993	114602646917	1048469090	1013339736	96.6495	37.91	94.19
F73-RWGS-25-153-P	174887007075	158050676177	140149239962	1177694240	1140181292	96.8147	46.4	94.33
F73-RWGS-25-154-F	224676413422	204181254524	177912607692	1515117398	1467858722	96.8809	58.89	94.47
F73-RWGS-25-155-M	162082348305	147279393154	132322356318	1093762240	1064086819	97.2868	43.84	93.81
F74-RWGS-25-156-P	151739353721	135957069317	78065814178	1024691550	984063545	96.0351	25.86	93.23
F74-RWGS-25-157-M	93275966726	82500440695	46375877110	627938376	604315445	96.238	15.36	87.75
F74-RWGS-25-158-F	192423208903	170120885983	106843985438	1295681094	1240368892	95.731	35.37	94.14
F75-RWGS-25-159-P	232645196359	209849020833	180894391535	1567984566	1521715764	97.0492	59.92	94.26
F75-RWGS-25-160-M	199241206093	179434801350	154066269544	1343485970	1303042638	96.9897	51	93.82
F75-RWGS-25-161-F	155944059730	139904362115	120917605230	1050481400	1016044457	96.7218	40.05	94.02
F76-RWGS-25-162-P	202781906093	183564130572	146568184951	1365589094	1327590905	97.2175	48.5	93.78
F76-RWGS-25-163-M	181222131100	161517135913	131037125631	1220542430	1183477935	96.9633	43.37	93.75
F76-RWGS-25-164-F	155139208591	139436875657	113570978639	1045215664	1012060163	96.8279	37.63	94.26
F77-RWGS-25-165-P	194261324629	175454854601	152839644770	1308215148	1266819385	96.8357	50.59	93.84
F77-RWGS-25-166-M	202025778175	183719708010	159965222504	1361660060	1319309354	96.8898	52.92	93.79
F77-RWGS-25-167-F	172469401139	156857972161	132626754613	1161672512	1123575682	96.7205	43.94	94.39
F78-RWGS-25-168-P	217333798670	195242225125	176726629521	1464689298	1416636353	96.7192	58.49	94.49
F78-RWGS-25-169-M	184573228454	166602758995	150875170996	1244168190	1207890249	97.0842	49.93	93.84
F78-RWGS-25-170-F	139379185417	126229200529	113052602395	938809022	910755208	97.0118	37.44	94.19
F79-RWGS-25-171-P	239319118375	218097697761	178227250586	1609628264	1553127122	96.4898	58.97	94.48
F79-RWGS-25-172-M	209159248878	190821314695	160976284932	1407356666	1361291056	96.7268	53.27	93.94
F79-RWGS-25-173-F	117015225531	106738379850	87629084724	787297314	761148447	96.6787	28.99	93.58
F80-RWGS-25-174-P	156426436892	142825717403	116075460966	1056975876	1025187019	96.9925	38.42	94.1
F80-RWGS-25-175-M	199386602901	183067960053	147576322463	1350982586	1312486322	97.1505	48.83	93.73
F80-RWGS-25-176-F	210968678470	193851478692	151601242793	1430865156	1389048649	97.0775	50.17	94.34
F81-RWGS-25-177-P	216621848954	198381186564	160615126894	1457029822	1414574466	97.0862	53.16	93.89
F81-RWGS-25-178-M	179509797503	164308221425	137244844866	1207126112	1172749638	97.1522	45.43	93.8
F81-RWGS-25-179-F	185091322762	169323315631	140819508029	1245537370	1205620441	96.7952	46.6	94.4
F82-RWGS-25-180-P	177097105390	160753943804	136555041526	1191800060	1154791694	96.8948	45.21	94.31
F82-RWGS-25-181-M	158812367560	143405515745	123126358996	1068904702	1038360069	97.1424	40.77	93.74
F82-RWGS-25-182-F	202149598064	183742584631	155944088544	1362024542	1318038148	96.7705	51.63	94.43
F83-RWGS-25-183-P	212877134554	193135239391	156399460749	1431286310	1383967174	96.6939	51.75	94.4
F83-RWGS-25-184-M	187096588856	170250219896	134797098222	1257968740	1220799809	97.0453	44.67	93.93
F83-RWGS-25-185-F	175214473880	159381441672	129204623360	1178243510	1135228434	96.3492	42.77	94.27
F84-RWGS-25-186-P	236660104549	211945937793	184086140101	1594972504	1541536461	96.6497	60.96	93.97
F84-RWGS-25-187-M	174881649864	156176864922	131947571381	1178554556	1139591456	96.694	43.71	93.86
F84-RWGS-25-188-F	173602132797	156763420305	134345081253	1172646682	1134856957	96.7774	44.5	94.33
F85-RWGS-25-189-P	133397410339	122496176223	102583962553	899014836	870599085	96.8392	33.96	93.98
F85-RWGS-25-190-M	211430943486	194526599620	161962406465	1425673578	1383310419	97.0286	53.62	93.86
F85-RWGS-25-191-F	225505283646	206351028614	170881475873	1519167732	1467276652	96.5842	56.57	94.5
F86-RWGS-25-192-P	259458699084	237983645583	198326836452	1771556932	1721394647	97.1685	65.64	93.97
F86-RWGS-25-193-M	161980905675	146528833658	124781107834	1091350766	1061134947	97.2313	41.31	93.76
F86-RWGS-25-194-F	153780481521	138425391629	123427376033	1035580766	1000927187	96.6537	40.87	94.33
F87-RWGS-25-195-F	209009048802	192688154415	138885133177	1406530646	1364684650	97.0249	45.99	94.39
F87-RWGS-25-196-M	134180158627	123251140896	88984510685	903249060	874620942	96.8305	29.47	93.51
F87-RWGS-25-197-P	200852540763	184454991129	131934552368	1350930446	1308280613	96.8429	43.66	94.31
F88-RWGS-25-198-P	180505935929	164194871678	135094770057	1215175124	1175675003	96.7494	44.73	94.39
F88-RWGS-25-199-M	207122116590	187547269226	158333324972	1394052494	1351096261	96.9186	52.4	93.91
F88-RWGS-25-200-F	171683381998	156257612701	125505284526	1156362488	1119295517	96.7945	41.55	94.28
F89-RWGS-25-201-P	136520513872	123997969932	100867184829	919948522	889889973	96.7326	33.4	93.6
F89-RWGS-25-202-M	178022629648	161690491852	131372007666	1198621090	1160988934	96.8604	43.48	93.81
F89-RWGS-25-203-F	178919123353	162790544961	129796991404	1205794664	1164218600	96.552	42.97	94.34
F90-RWGS-25-204-P	179032191102	164403523102	135203161559	1205603258	1169467827	97.0027	44.79	94.29
F90-RWGS-25-205-M	180803358236	165393019854	138864145562	1217758810	1184697044	97.285	45.97	93.79
F90-RWGS-25-206-F	174590483281	158591347118	136099128331	1175368914	1139151727	96.9187	45.08	94.38
F91-RWGS-25-207-P	202505343312	183248826507	148241393702	1363090152	1323489741	97.0948	49.06	93.83
F91-RWGS-25-208-M	198517350468	180025614658	144002011146	1336360626	1300379015	97.3075	47.66	93.81
F91-RWGS-25-209-F	162775045904	145998972520	122136024426	1094291396	1058187556	96.7007	40.47	94.3
F92-RWGS-25-210-P	192256632761	173826595708	138373288695	1294202934	1252570351	96.7831	45.8	94.31
F92-RWGS-25-211-M	193865488263	174452148114	139887064302	1305601864	1266376901	96.9956	46.32	93.86
F92-RWGS-25-212-F	170595991356	154113516322	123536739325	1153745186	1117509812	96.8593	40.86	94.1
F93-RWGS-25-213-P	106647310466	96398389999	83344051762	721365236	695818586	96.4586	27.59	93.44
F93-RWGS-25-214-M	106682838366	97377142669	83908114792	721884046	698039415	96.6969	27.78	93.44
F93-RWGS-25-215-F	123722721617	112109944012	96184043389	836848724	803423419	96.0058	31.84	93.88
F94-RWGS-25-216-P	117695899662	107307089394	92080956449	795740976	766961754	96.3833	30.48	93.78
F95-RWGS-25-219-P	119260906378	108110149087	93137987153	806937996	779074308	96.547	30.84	93.85
F95-RWGS-25-220-M	135523022362	123397643237	106630845781	918047076	889367692	96.876	35.3	93.62
F95-RWGS-25-221-F	112571480783	102769513164	87714323649	761366792	737706921	96.8924	29.06	93.75
F96-RWGS-25-222-P	84414624878	74813475920	72853385602	568862932	550795090	96.8239	24.12	93.22
F96-RWGS-25-223-M	70903375534	63083336497	61485582936	477626840	462733075	96.8817	20.36	92.64
F97-RWGS-25-224-P	175547852160	154979435451	137563161995	1186853370	1148645534	96.7807	45.55	93.87
F97-RWGS-25-225-M	191381368018	169333480395	146167788127	1294239546	1251812880	96.7219	48.42	93.95
F97-RWGS-25-226-F	182903271013	161859043822	139481277699	1237408116	1193436618	96.4465	46.17	94.38
F98-RWGS-25-227-P	157638639091	140748799924	116692433176	1066585230	1028639101	96.4423	38.65	94.51
F98-RWGS-25-228-M	171857873049	152718088667	126930625465	1164553390	1123956620	96.514	42.01	94.01
F98-RWGS-25-229-F	206684068558	183304540183	152063745588	1398522490	1350212195	96.5456	50.32	94.66
RWGS-25-F99-230-P	149609277242	134978149847	123663000000	1012842446	980565625	96.8132	40.93	94.05
RWGS-25-F99-231-M	130051000000	117619964101	106839161717	878666418	851196137	96.8736	35.38	93.97
RWGS-25-F99-232-F	107816441648	97929514693	88292952274	728984752	706434226	96.9066	29.22	93.95
F100-RWGS-25-233-P	130417387670	118160245101	107211365549	883927678	856002871	96.8408	35.47	93.71
F100-RWGS-25-234-F	137178991583	124249896768	111032215610	930400538	898485792	96.5698	36.75	94.26
F100-RWGS-25-235-M	110862112655	100766149063	90216126355	750769482	727548297	96.907	29.84	93.57
F101-RWGS-25-236-P	121804981103	110555565723	99160205427	824398280	797077288	96.6859	32.82	93.71
F101-RWGS-25-237-M	108655105301	98371185529	88513076543	736511318	710719584	96.4981	29.29	93.58
F101-RWGS-25-238-F	96386816168	87651839789	78378739020	653354958	631188451	96.6073	25.93	93.29
F102-RWGS-25-239-P	123622488590	112264628834	102014927864	834668808	806587335	96.6356	33.75	94.11
F102-RWGS-25-240-M	121513728113	110392757896	101112107429	821074318	794604528	96.7762	33.45	93.65
F102-RWGS-25-241-F	124351855012	112770315397	102614641418	839273966	811657553	96.7095	33.95	94.14

## Sheet: S2-rWGS Cohort
SN	Case ID	Gender	Age at Presentation (days)	Nationality	Clinical Indications	Parental Relatedness Coefficient	Result	Further Details	Zygosity	Origin	Disease	Inheritance	ACMG Codes	AGMC Classification	Secondary/Incidental	Newborn Screening	Carrier Screening	Pharmacogenomic Screening	Sample Prep (hh:mm)	Sequencing & BioX (hh:mm)	Interpretation & Reporting (hh:mm)	Total (hh:mm)	Change in NICU/PICU Management (Y/N)	Medication/Diet	Diagnostics	Surgical/ Procedural	Subspeciality Consultation	Palliative Care / AND
1	F01-RWGS-23-01-P	M	4336	UNITED ARAB EMIRATES	Spastic tetraplegia, Failure to thrive, Cerebral palsy, Development delay, Dysmorphic features	0.178	Negative										NM_001039876.3(SYNE4):c.253_259dup; p.(Ala87Glyfs*9)	CYP2C9*3 (rs1057910)	9:02	46:19	0:07	55:28	No
2	F02-RWGS-23-04-P	M	0	PAKISTAN	Macrocephaly, Cleft lip and palate, Multiple congenital anomalies, Holoprosencephaly, Hydrocephalus	0	Negative											CYP2D6*41 (rs28371725)	27:54	43:27	4:33	75:54	No
3	F03-RWGS-23-07-P	F	3124	UNITED ARAB EMIRATES	Global developmental delay, Seizure, Dysmorphic features, Axial hypotonia, Microphthalmia, Microcornea, bilateral hypermetropia, Club foot bilateral, Refractory epilepsy	0.09	Positive	NM_001371986.1(UNC80):c.2248G>T; p.(Gly750*)	Homozygous	Father Mother	Hypotonia, infantile, with psychomotor retardation and characteristic facies	AR	PVS1,PM2	Likely pathogenic				CYP2C9*3 (rs1057910)	8:17	47:03	1:07	56:27	No
																		CYP2D6*4 (rs3892097)
4	F04-RWGS-23-10-P	F	3081	CANADA	Refractory status epilepticus, Seizure, Febrile seizure outside the age of 3 months to 6 years, autoimmune encephalitis	0	Negative										NM_001292063.2(OTOG):c.7418del; p.(Arg2473fs)		25:31	66:38	1:27	93:36	No
																	NM_000488.4(SERPINC1):c.218C>T; p.(Pro73Leu)
5	F05-RWGS-23-13-P	M	107	SYRIAN ARAB REPUBLIC	Leukocyte migration defect, Sepsis, Recurrent infections, Thrombocytopenia, Anemia, Leukocytosis, Respiratory failure, Hypocalcemia, Knee osteoarthritis, Septic shock, Leukocyte Adhesion Deficiency	0.125	Positive	NM_000211.5(ITGB2):c.817_819delinsTCT; p.(Gly273Ser)	Homozygous	Father Mother	Leukocyte adhesion deficiency	AR	PM5,PM2,PP4_M,PP3	Likely pathogenic				CYP2D6*41 (rs28371725)	25:05	51:37	1:02	77:44	Yes	Started prophylactic antibiotics, transfusions	Eliminated further investigations	Bone marrow transplant	Hematology/Oncology, ID
																		CYP2D6*17 (rs28371706)
																		CYP2C9*2 (rs1799853)
																		CYP2C9*3 (rs1057910)
6	F06-RWGS-23-16-P	M	0	UNITED ARAB EMIRATES	Skeletal dysplasia, Respiratory distress of newborn, Pierre-Robin sequence, Respiratory distress, Mesolimbic dysplasia, Respiratory insufficiency	0.038	Negative												27:08	60:06	13:56	101:10	No
7	F07-RWGS-23-19-P	F	0	UNITED ARAB EMIRATES	Esophageal atresia, Intrauterine growth retardation, Dextrocardia, Ventricular septal defect, Respiratory distress, Polyhydramnios, Abnormal heart morphology, Congenital heart disease	0.072	Negative										NM_000500.7(CYP21A2):c.955C>T; p.(Gln319*)		26:18	47:42	17:42	91:42	No
8	F08-RWGS-23-22-P	F	0	SRI LANKA	Ambiguous genitalia, Anal atresia, Vacterl association, Disorder of sexual differentiation	0	Negative												26:47	47:08	19:41	93:36	No
9	F09-RWGS-23-25-P	M	0	PAKISTAN	Respiratory distress, abnormality of the coagulation cascade, congenital hemolytic anemia, hypertrophic cardiomyopathy, neonatal hyperbilirubinemia	0.085	Positive	NM_001098668.4(SFTPA2):c.637C>T; p.(Arg213*)	Homozygous	Father Mother	Interstitial lung disease 2	AR	PM2,PP4_S	Likely pathogenic				CYP2C9*2 (rs1799853)	70:59	114:32	3:11	188:43	Yes		Eliminated further investigations
10	F10-RWGS-23-28-P	M	38	SYRIAN ARAB REPUBLIC	Abnormal findings on neonatal metabolic screening, High urine methylmalonic acid, Thrombocytopenia	0	Positive	NM_015506.3(MMACHC):c.271dup;p.(Arg91Lysfs*14)	Homozygous	Father Mother	Methylmalonic aciduria and homocystinuria, cblC type	AR	PVS1,PS3,PM3	Pathogenic				F5 (rs6025)	25:25	61:34	4:45	91:44	Yes	Started hydroxocobalamin (vitamin b12) betaine (AMBETAINE) leucovorin	Eliminated further investigations	Avoided bone marrow aspirate due to suspecision of HLH	Prombted
11	F11-RWGS-23-31-P	M	0	NEPAL	congenital heart disease , Penile hypospadias, Anal atresia, Neonatal respiratory distress, Preauricular skin tag, Congenital preauricular pit, Isolated dextrocardia, Neonatal hypoglycemia, Interrupted aortic arch	0	Positive	Duplication at 22q	Heterozygous	De novo	cat eye syndrome			Pathogenic			NM_001128227.3(GNE):c.2179G>A; p.(Val727Met)	UGT1A1*6 (rs4148323)	70:21	48:21	0:43	119:25	Yes	Diet modification	Prombted further testing	Decision of heart surgery plan	Prombted
																	NM_000463.3(UGT1A1):c.211G>A; p.(Gly71Arg)	CYP2C9*3 (rs1057910)
12	F12-RWGS-23-34-P	F	0	PAKISTAN	Ocular albinism, Hepatosplenomegaly, Hypokalemia, Neutropenia, Congenital pneumonia, respiratory distress syndrome in the newborn	0	Positive	NM_003664.5(AP3B1):c.205-1G>C;p.?	Homozygous	Father Mother	Hermansky-Pudlak syndrome 2	AR	PVS1,PM2	Likely pathogenic			NM_000518.5(HBB):c.92+5G>C; p.?	NUDT15*3 (rs116855232)	23:57	54:48	11:31	90:16	Yes	started prophylactic antibiotics, transfusions	Eliminated further investigation		Pulmonology, immunology, haematology, dermatology, and opthalmolgy
																	NM_001281723.3(BTD):c.1270G>C; p.(Asp424His)
13	F13-RWGS-23-37-P	M	76	PAKISTAN	Ketoacidosis, High urine methylmalonic acid suggestive of a disorder cobalamin or methylmalonic acidemia, Low vitamin B12 level, Femoral vein thrombosis left, Septic/ Hypovolemic shock, Status post orchiopexy, Hyperglycemia, Hypernatremia, Hypokalemia, Elevated transaminases, Metabolic Acidosis	0.113	Positive	NM_052845.4(MMAB):c.197-1G>T;p.?	Homozygous	Father Mother	Methylmalonic aciduria, vitamin B12-responsive, cblB type	AR	PVS1,PS3,PM3	Pathogenic				CYP2C9*3 (rs1057910)	6:25	51:21	23:09	80:55	Yes	Started Hydroxocobalamin acetate as a treatment for his condition	Monitoring labs	Required Porta-cath insertion for long IV access.	Dietitian, Genetic, Cardiology
																		CYP2D6*41 (rs28371725)
																		CYP2D6*4 (rs3892097)
14	F14-RWGS-23-40-P	M	43	NEPAL	Methemoglobinemia	Duo WGS	Negative										NM_001079866.2(BCS1L):c.399del; p.(Glu133fs)		53:11	22:03	13:15	88:29	Yes	Avoided long term medications	Eliminated further investigation
15	F15-RWGS-23-43-P	M	1	UNITED ARAB EMIRATES	hepatosplenomegaly, hyperbilirubinemia, elevated lactic acid, dysmorphic facial feautres, short neck and thrombocytopenia	0	Positive	NM_020458.4(TTC7A):c.109C>T;p.(Gln37*)	Compound heterozygous	Father	Gastrointestinal defects and immunodeficiency syndrome	AR	PVS1,PM2	Likely pathogenic	NM_007294.4(BRCA1): c.5096G>A; p.(Arg1699Gln)		NM_001171.6(ABCC6):c.3491G>A; p.(Arg1164Gln)	CYP2D6*4 (rs3892097)	53:14	21:54	14:24	89:32	No
								NM_020458.4(TTC7A):c.635A>C;p.(Gln212Pro)		Mother			PM3,PM2,PP4_M,P3	Likely pathogenic
16	F16-RWGS-23-46-P	F	0	SUDAN	Hydrocephalus , Macrocephaly, Respiratory distress, Premature birth	0	Negative										NM_000135.4(FANCA):c.2151+2T>C; p.?	CYP3A5*6 (rs10264272)	7:44	48:17	14:50	70:51	No
																		CYP2C9*2 (rs1799853)
17	F17-RWGS-23-49-P	F	37	INDIA	Premature birth, Respiratory distress, Conjugated hyperbilirubinemia, Pulmonary hypertension, Patent ductus arteriosus, Necrotising enterocolitis, Pneumonia, Hypokalemia, Hyponatremia, Hypomagnesemia, Cytomegalovirus, Anaemia, Thrombocytopenia, Metabolic bone disease , Feed intolerance, Leukopenia , Retinopathy of prematurity, Faciitis, Budd- chiari syndrome, Hypoalbuminemia, Ascites , Sepsis	0.011	Negative										NM_000709.4(BCKDHA):c.632C>T; p.(Thr211Met)	CYP2D6*4 (rs3892097)	9:01	51:20	13:27	73:48	No
																	NM_153700.2(STRC):c.4701+1G>A; p.?
18	F18-RWGS-23-52-P	M	9	UNITED ARAB EMIRATES	Neonatal seizures, Cerebral venous sinus thrombosis, Patent foramen ovale, Hypospadias	0	Inconclusive	NM_016148.5(SHANK1):c.3858A>C; p.(Lys1286Asn)	Heterozygous	De novo	Neurodevelopmental disorders	AD	PM2,BP4	Uncertain significance			NM_000518.5(HBB):c.92+5G>C; p.?		5:09	117:50	1:07	124:06	No
								NM_000726.5(CACNB4):c.1516C>T; p.(Arg506*)	Heterozygous	Mother	Epilepsy, Idiopathic Generalized, Susceptibility To, 9; Eig9	AD	PM2	Uncertain significance			NM_016148.5(SLC26A4):c.3858A>C; p.(Lys1286Asn)
19	F19-RWGS-23-55-P	F	0	INDIA	Rhabdomyoma, Neonatal respiratory distress	0.012	Positive	NM_000548.5(TSC2):c.4662+1G>A; p.?	Heterozygous	De novo	Tuberous sclerosis-2	AD	PVS1,PS4.PM2	Pathogenic					97:00	103:41	0:39	201:20	Yes		Further imaging and investigations required for TS		Prombted
20	F20-RWGS-23-58-P	F	0	UNITED ARAB EMIRATES	Abnormal facial shape, Partial agenesis of the corpus callosum, Abnormal heart morphology, Intrauterine growth retardation, Small for gestational age, Neonatal respiratory distress	0.007	Positive	Terminal duplication 4q32.1 – q35.2	Heterozygous	De novo	4q Duplication Syndrome			Pathogenic			NM_080916.3(DGUOK):c.130G>A; p.(Glu44Lys)	CYP2D6*17 (rs28371706)	6:10	44:42	2:00	52:52	Yes		Eliminated further testing	Avoided cardiac intervention in view of poor prognosis		Contributed
								Partial trisomy 13q11 – q12.3	Heterozygous	De novo	Patau’s Syndrome			Pathogenic
21	F21-RWGS-23-61-P	M	7	INDIA	Neonatal seizure, Neonatal sepsis, Cholestasis, Hepatic failure, Thrombocytopenia, Pancytopenia, Anemia, Acute kidney injury, Hypoglycemia, Dehydration, Hypotension, Respiratory failure, Conjugated hyperbilirubinemia, Hypoalbuminemia, Hypernatremia, Neonatal hyperbilirubinemia, Neonatal intestinal obstruction, Disseminated intravascular coagulation, Capillary leak, Aganglionic megacolon, Prolonge…	0	Negative										NM_ 000500.9(CYP21A2):c.293-13C>G; p.?		5:20	67:35	1:01	73:56	No
22	F22-RWGS-24-01-P	F	0	EGYPT	Tetralogy of Fallot with pulmonary atresia, Neonatal respiratory distress, Hypoglycemia	0	Positive	Deletion of the 22q11.2 proximal (A-D) region	Heterozygous	De novo	DiGeorge syndrome			Pathogenic			NM_001281723.3(BTD):c.1270G>C; p.(Asp424His)	CYP2D6*4 (rs3892097)	5:02	67:40	1:53	74:35	Yes		Prombted testing for the different systems that can be involoved. Ex. Immune status, barium swallow..	Performed cardiac surgery as part of the symptomatic treatment of her condition	Infectious, immunologist and pulmonologist. Following with cardiologist as well.
23	F23-RWGS-24-04-P	M	182	GERMANY	Coarctation of aorta, Ventricular septal defect, Cleft palate, Cleft lip, Respiratory distress, Prolonged neonatal jaundice	0	Negative										NM_000383.4(AIRE):c.652+1G>T;p.?		23:55	46:30	3:16	73:41	No
																	NM_000426.4(LAMA2):c.2049_2050del; p.(Arg683Serfs*21)
																	NM_000295.5(SERPINA1):c.863A>T; p.(Glu288Val)
24	F24-RWGS-24-07-P	M	0	INDIA	Multicystic kidney dysplasia, Neonatal respiratory distress, Retrognathia, Small for gestational age, Skeletal dysplasia	0	Negative										NM_000350.3(ABCA4):c.5882G>A; p.(Gly1961Glu)		4:08	47:29	1:17	52:54	No
25	F25-RWGS-24-10-P	F	98	UNITED ARAB EMIRATES	Jaundice, Conjugated hyperbilirubinemia, Giant cell hepatitis, Cerebrotendinous xanthomatosis	0.175	Positive	NM_006432.5(NPC2):c.289del; p.(Ile97Leufs*14)	Homozygous	Father Mother	Niemann-pick disease, type C2	AR	PVS1,PM3,PM2	Pathogenic				CYP2C9*2 (rs1799853)	25:09	45:04	0:44	70:57	Yes	Started experimental treatment given for her condition.			Metabolic team and Multiple subspeciality involvement due to her general condition	AND signed
																		CYP2D6*41 (rs28371725)
26	F26-RWGS-24-13-P	M	1	PAKISTAN	Respiratory failure, Patent ductus arteriosus, Dilated cardiomyopathy, Elevated circulating creatinine, concentration, Hypotension, Portal vein thrombosis, Elevated lactate:pyruvate ratio, Abnormal circulating amino acid, concentration, Retrognathia, Microretrognathia, Elevated N tyrosine and oxoglutarate, Depressed cardiac functions, Persistent pulmonary, hypertension of newborn, Abnormal facial…	0.097	Positive	NM_016035.5(COQ4):c.370G>A;p.(Gly124Ser)	Homozygous	Father Mother	Coenzyme Q10 deficiency, primary, 7	AR	PS3,PM3,PM5,PM2	Pathogenic			NM_001298.3(CNGA3):c.1279C>T; p.(Arg427Cys)	CYP2B6*5 (rs3211371)	6:03	48:47	0:48	55:38	Yes	Started on thiamine and co-enzyme Q-10 supplementation	Prompted further testing for systems involovement		Metabolic, Cardiology, Ophthalmology and Neurology
27	F27-RWGS-24-16-P	F	235	SRI LANKA	Anal atresia, Abnormal heart morphology, Neonatal respiratory distress, Premature birth, Coarctation of aorta, Rectovestibular fistula, Abnormal facial shape	0.082	Positive	NM_000237.3(LPL):c.808C>G; p.(Arg270Gly)	Homozygous	Father Mother	Lipoprotein lipase deficiency	AR	PS3,PM3,PM5,PM2	Likely pathogenic			NM_000155.2(GALT):c.-119_-116delGTCA; p.?		7:17	134:45	1:16	143:18	Yes	Started MCT and Monogen			Metabolic, Endocrine, Gastro and Ophthalmology
								NM_000350.3(ABCA4):c.5882G>A;p.Gly1961Glu	Homozygous	Father Mother	Macular degeneration, age-related, 2	AR	PS3,PM3_VS,PM5,PP1	Pathogenic					23:54	48:38	2:52	75:24
28	F29-RWGS-24-21-P	M	69	UNITED ARAB EMIRATES	Jaundice, Hyperbilirubinemia, Acute liver failure	0.135	Positive	NM_001183.6(ATP6AP1):c.443T>C;p.(Leu148Pro)	Hemizygous	Mother	Immunodeficiency	XLR	PM2, PP1, PP4_S, PP3	Likely pathogenic			NM_000243.3(MEFV):c.443T>C; p.(Leu148Pro)		23:54	48:38	2:52	75:24	Yes			Planned liver transplant	Yes
29	F30-RWGS-24-24-P	F	117	COMOROS	Respiratory distress, Lactic acidosis, Neonatal hyperbilirubinemia, Macrocephaly, Abnormal, shape, Short neck, Thrombocytopenia, Agenesis of corpus callosum	0.079	Negative											CYP2D6*41 (rs28371725)	50:20	46:34	1:46	98:40	No
30	F31-RWGS-24-29-P	F	2430	UNITED ARAB EMIRATES	Epileptic encephalopathy, infantile spasms, global developmental delay, generalized central hypotonia and refectory seizures.	0.084	Positive	NM_052867.4(NALCN) 10.7Kb deletion including exon 11	Homozygous	Father Mother	Hypotonia, infantile, with psychomotor retardation and characteristic facies	AR		Likely pathogenic				CYP2D6*41 (rs28371725)	26:30	46:47	1:54	75:11	No
31	F32-RWGS-24-30-P	F	107	INDIA	Neuroregression suspected neurometabolic disorder, Infantile spasms	0.126	Positive	NM_025243.4(SLC19A3):c.68G>T; p.(Gly23Val)	Homozygous	Father Mother	Thiamine metabolism dysfunction syndrome 2	AR	PM3_VS,PM5,PM2,PP1,PP3	Pathogenic				CYP2D6*41 (rs28371725)	9:47	72:13	1:08	83:08	Yes	Biotin and Thiamine started and doses optimized (established the need for life long treatment)	Eliminated further evaluation and testing		Metabolic and genetic, continued with neurology
								NM_001281723.3(BTD):c.545A>T; p.(Asn182Ile)	Compound heterozygous	Father	Biotinidase deficiency	AR	PM3,PM1,PM2,PP2	Likely pathogenic
								NM_001281723.3(BTD):c.908A>G; p.(His303Arg)		Mother			PM1,PP3,PM2,PP2	Likely pathogenic
32	F33-RWGS-24-33-P	F	0	PHILIPPINE	conjugated hyperbilirubinemia, Pulmonic stenosis	0	Negative												7:35	49:22	1:53	58:51	No
33	F34-RWGS-24-38-P	F	0	UNITED ARAB EMIRATES	Megacystis, microcolon, hypoperistalsis syndrome	0	Positive	NM_001615.4(ACTG2):c.118C>T; p.(Arg40Cys)	Heterozygous	De novo	Megacystis-microcolon-intestinal hypoperistalsis syndrome 5	AD	PS2,PM5,PM2	Likely pathogenic			NM_000350.3(ABCA4):c.514G>A; p.(Gly172Ser)	CYP2B6*18 (rs28399499)	24:31	65:44	5:18	95:33	Yes	Long term TPN		Avoided stoma closure
																	NM_000402.4(G6PD):c.1093G>A; p.(Ala365Thr)	CYP2D6*4 (rs3892097)
34	F35-RWGS-24-39-P	M	2900	INDIA	Encephalopathy, Bilateral sensorineural hearing impairment, Seizure, Neilsen Syndrome, Cardiac arrest	0.012	Positive	NM_000218.3(KCNQ1) 149 Kbp intragenic duplication spanning exons 2-11	Homozygous	Father Mother	Jervell and Lange-Nielsen syndrome	AR		Likely pathogenic					4:52	51:24	17:06	73:22	Yes	Confirmed continuation of ongoing medications	eliminated the need for further evaluation
35	F36-RWGS-24-44-P	F	0	YEMEN	Hypoglycemia, Respiratory distress, dysmorphism, Pyriform aperture stenosis, Solitary median maxillary central incisor, nasal stenosis, Choanal stenosis	0	Negative										NM_000402.4(G6PD):c.292G>A; p.(Val98Met)	CYP2D6*17 (rs28371706)	74:35	44:27	26:47	145:49	No
																		CYP2C9*2 (rs1799853)
36	F37-RGWS-24-45-P	F	3	YEMEN	Hypoplasia of lung, Potter's facies and Acute renal failure	0.096	Positive	NM_000789.4(ACE):c.982_984del; p.(Glu328del)	Homozygous	Father Mother	Renal tubular dysgenesis	AR	PM3,PM4,PM2,PP4_M	Likely pathogenic					2:01	50:02	1:15	53:18	Yes		Monitoring labs		Nephrology
37	F38-RGWS-24-48-P	M	0	JORDAN	cleft palate, severe retro-micrognathia, glossoptosis , Arthrogryposis, bowing of femur bones , Pierre Robin sequence	0	Positive	NM_000435.3(NOTCH3):c.2882A>G; p.(His961Arg)	Heterozygous	De novo	Lateral meningocele syndrome	AD	PS2,PM2,PP4_M,PP2	Likely pathogenic					4:59	50:23	2:44	58:06	Yes	Bisphosphonate avoided	Eliminated the need for further evaluation
38	F39-RWGS-24-53-P	M	167	BANGLADESH	Seizure, Microcephaly, Sensorineural hearing impairment, Optic atrophy, elevated copper, neuro metabolic disorder	0	Positive	NM_001286704.2(UFM1):c.170_171+1del; p.(Glu57del)(p.?)	Compound heterozygous	Mother	Leukodystrophy, hypomyelinating, 14	AR	PVS1,PM2	Likely pathogenic				NUDT15*3 (rs116855232)	7:01	96:09	3:05	106:16	Yes		Eliminated the need for further evaluation		Prombted	Prombted palliative care
								NM_001286704.2(UFM1):c.-273_-271del; p.?		Father			PS3,PM3,PM2	Likely pathogenic				CYP2B6*5 (rs3211371)
																		CYP2D6*4 (rs3892097)
39	F40-RWGS-24-54-P	M	4785	UNITED ARAB EMIRATES	Lymphadenitis, Lymphoproliferative disorder, Immunodeficiency, septic shock, Respiratory, distress, high lactate, Fever	0	Negative										NM_000587.4(C7):c.1135G>C; p.(Gly379Arg)	CYP2C9*2 (rs1799853)	7:05	95:23	0:47	103:16	No
40	F41-RWGS-24-57-P	F	0	PHILIPPINE	absent + fused ribs abnormal posterior fossa in the brain (small Blake 's pouch cyst with not causing pressure on the cerebellum) spine anomaly- closed neural tube defect lung CPAM High Arched palate	0.032	Inconclusive	NM_003470.3(USP7):c.739A>T; p.(Thr247Ser)	Heterozygous	De novo	Hao-Fountain syndrome	AD	PS2,PM2,BP4	Uncertain significance					19:38	50:24	1:22	71:25	No
41	F42-RWGS-24-60-P	F	9	JORDAN	Axial hypotonia, Apnea	0.008	Positive	NM_003924.4(PHOX2B):c.741_758dup; p.(Ala255_Ala260dup)	Heterozygous	De novo	Central hypoventilation syndrome, congenital, 1, with or without Hirschsprung disease	AD	PS2,PS1,PM2	Pathogenic			NM_000505.4(F12):c.971_1018+24del; p.?	CYP3A5*6 (rs10264272)	7:37	60:49	4:14	72:41	Yes	Caffeine stopped	Prombted renal US looking for suprarenal gland due to high risk of neuroblastoma	Performed tracheostomy	Referred to ENT and Pulmonology
																		CYP2D6*41 (rs28371725)
42	F43-RWGS-24-63-P	M	118	UNITED ARAB EMIRATES	Hyponatremia, Hypospadias, Omphalocele, Tetralogy of Fallot,Penile chordee, VACTERL association, congenital heart disease, Triangular face, hypertrophy of both ventricles, Cryptorchidism	0	Inconclusive	NM_000276.4(OCRL):c.2489G>A; p.(Arg830Lys)	Hemizygous	Mother	Lowe syndrome	XLR	PM2,BP4	Uncertain significance					24:25	53:48	15:05	93:19	No
43	F44-RWGS-24-66-P	M	148	SUDAN	Hyperinsulinemia, Hypoglycemia	0.125	Negative											CYP2C9*3 (rs1057910)	23:32	64:22	1:49	89:43	Yes	Avoided long term treatment with diazoxide	Eliminated the need for further evaluation
																		CYP2D6*17 (rs28371706)
44	F45-RWGS-24-69-P	F	0	UNITED ARAB EMIRATES	Cyanotic congenital heart disease, Subtle dysmorphic features, Heterotaxy, Asplenia, Hepatomegaly	0	Inconclusive	NM_198947.4(FAM111B):c.265T>C; p.(Ser89Pro)	Heterozygous	De novo	POIKILODERMA, HEREDITARY FIBROSING, WITH TENDON CONTRACTURES, MYOPATHY, AND PULMONARY FIBROSIS; POIKTMP	AD	PM2,BP4	Uncertain significance				CYP2B6*5 (rs3211371)	5:29	46:55	15:59	68:23	No
																		CYP2D6*4 (rs3892097)
45	F47-RWGS-24-75-P	M	0	OMAN	Cleft hard palate, Cleft lip, Nail dystrophy, Loss of eyelashes, Ectodermal dysplasia, Thrombocytosis, Patent foramen ovale	0	Inconclusive	NM_003722.5(TP63):c.1766T>A; p.(Ile589Asn)	Heterozygous	Father	Hay-Wells syndrome	AD	PM2,PP3	Uncertain significance				CYP2D6*41 (rs28371725)	4:58	62:14	8:52	76:04	No
																		CYP2D6*17 (rs28371706)
46	F48-RWGS-24-78-P	M	30	UNITED ARAB EMIRATES	Intraventricular hemorrhage, Polyhydramnios, Acute kidney injury, Hydrocephalus, Abnormal heart morphology, Bartter syndrome	0.148	Positive	NM_000220.6(KCNJ1):c.123G>C; p.(Arg41Ser)	Homozygous	Father Mother	Bartter syndrome, type 2	AR	PM2,PP3,PP2,PP4_M	Likely pathogenic			NM_000410.4(HFE):c.187C>G; p.(His63Asp)	CYP2D6*4 (rs3892097)	6:03	52:24	12:57	71:24	Yes		Monitoring labs		Nephrology
																	NM_000350.3(ABCA4):c.5113C>T; p.(Arg1705Trp)
47	F49-RWGS-24-81-P	M	60	JORDAN	Pulmonary hypoplasia, Esophageal atresia, Horseshoe kidney, Anorectal anomaly, Hypospadias ,Anuria	0	Negative												4:40	50:51	21:12	76:43	No
48	F50-RWGS-24-84-P	M	5840	UNITED ARAB EMIRATES	Autoimmune diseaes, acute kidney injury, Refractory status epilepticus	0	Negative										NM_000135.4(FANCA):c.416_417del; p.(Val139fs)		26:07	39:00	2:54	68:01	No
																	NM_004453.4(ETFDH):c.1367C>T; p.(Pro456Leu)
49	F51-RWGS-24-87-P	F	0	UNITED ARAB EMIRATES	Coarctation of aorta, Abnormal heart morphology, Premature birth	0	Positive	NM_015312.4(BLTP1):c.10619_10620del; p.(Ile3540Serfs*8)	Compound Heterozygous	Father	Alkuraya-Kucinskas syndrome	AR	PVS1,PM2,PP4_M	Likely pathogenic			NM_000517.6(HBA2):c.95+2_95+6del	CYP2C9*2 (rs1799853)	22:44	45:25	23:14	91:24	No
								NM_015312.4(BLTP1):c.7460C>T; p.(Thr2487Ile)		Mother			PM3,PM2,PP4_M	Likely pathogenic
50	F52-RWGS-24-90-P	F	0	YEMEN	Hypokalemia, Hyponatremia, Purulent eye discharge, Periventricular leukomalacia, Abnormal glucose-6-phosphate dehydrogenase level in blood, Neonatal hyperbilirubinemia, Thrombocytopenia, Leukopenia, Premature birth, Intrauterine growth retardation, Neonatal respiratory distress	0	Negative										NM_000410.4(HFE):c.187C>G;(p.(His63Asp)	DPYD (1236G>A/rs56038477)	69:23	46:21	3:04	118:49	No
																	NM_000402.4(G6PD):c.292G>A; p.(Val98Met)	CYP2D6*41 (rs28371725)
																	NM_000518.5(HBB):c.92+5G>C; p.?
51	F53-RWGS-24-93-P	F	20	PAKISTAN	Abnormal metabolism, Respiratory failure, Feeding difficulties	0.129	Positive	NM_000481.4(AMT):c.14dup; p.(Ser6Lysfs*22)	Homozygous	Father Mother	Glycine encephalopathy 2	AR	PVS1,PM3,PM2	Pathogenic				CYP2C9*3 (rs1057910)	21:11	44:45	1:55	67:51	Yes	Started sodium benzoate and dextromethorphan	Eliminated the need for further evaluation		Neurology, Ophthalmology and continued with metabolic
52	F54-RWGS-24-96-P	F	30	UNITED ARAB EMIRATES	Hypotension, Pulmonary hypertensive crisis, Congenital diaphragmatic hernia, Coarctation of aorta, Ventricular septal defect	0.015	Negative										NM_001142800.2(EYS):c.2137+1G>A; p.?		51:31	68:03	1:39	121:13	No
																	NM_000642.3(AGL):c.1078C>T; p.(His360Tyr)
																	NM_000104.4(CYP1B1):c.182G>A; (p.Gly61Glu)
53	F55-RWGS-24-99-P	F	89	PAKISTAN	Talipes equinovarus, Patent ductus arteriosus, Intraventricular hemorrhage, Neonatal respiratory distress, Intrauterine growth retardation	0	Negative										NM_000410.4(HFE):c.187C>G; p.(His63Asp)	NUDT15*3 (rs116855232)	5:08	57:02	6:10	68:20	No
																	NM_000538.4(RFXAP):c.302dup; p.(Gly102fs)
54	F56-RWGS-24-102-P	F	16	CAMEROUN (CAMEROON)	Pulmonary artery atresia, Ventricular septal defect, Patent ductus arteriosus, Fractured clavicle bone, Bilateral cleft palate, Scoliosis	0	Negative										NM_000441.2(SLC26A4):c.626G>T; p.(Gly209Val)	CYP3A5*7 (rs41303343)	4:54	46:44	1:03	52:41	No
																	NM_000350.3(ABCA4):c.6320G>A; p.(Arg2107His)
																	NM_000410.4(HFE):c.187C>G; p.(His63Asp)
55	F57-RWGS-24-105-P	F	114	COMOROS - Origin Arab	Hydrocephalus, Seizure, Dystonia, Pneumonia	0	Positive	NM_000404.4(GLB1):c.602G>A; p.(Arg201His)	Homozygous	Father Mother	GM1-gangliosidosis	AR	PS3,PM3,PM5,PP3	Pathogenic			NM_000199.5(SGSH):c.268G>A; p.(Gly90Arg)	CYP2D6*17 (rs28371706)	8:27	47:13	1:01	56:42	Yes		Prombted for Brain MRI		Metabolic, Audiology, Neurology	AND signed
								NM_016030.6(TRAPPC12):c.1603+5G>C;p.?	Homozygous	Father Mother	Encephalopathy, progressive, early-onset, with brain atrophy and spasticity	AR	PM3_S,PM2,PP4_M	Likely pathogenic			NM_000410.4(HFE):c.187C>G; p.(His63Asp)
56	F58-RWGS-24-108-P	F	0	UNITED ARAB EMIRATES	Skeletal dysplasia, Cleft palate, Micrognathia, Respiratory distress of newborn, Difficult airway for intubation, Respiratory distress, congenital anomalies	0	Inconclusive	NM_173660.5(DOK5):c.1313C>T; p.(Thr438Met)	Compound Heterozygous	Father	Fetal akinesia deformation sequence 1	AR	PM2,BP4	Uncertain significance			NM_000243.3(MEFV):c.2230G>T; p.(Ala744Ser)	CYP2D6*41 (rs28371725)	4:30	44:24	2:40	51:35	No
								NM_173660.5(DOK5):c.1354C>T; p.(Arg452Trp)		Mother			PM2,BP4	Uncertain significance			NM_000065.5(C6):c.1352dup; p.(Tyr451*)
																	NM_000282.4(PCCA):c.2040G>A; p.(Ala680=)
57	F59-RWGS-24-111-P	F	77	PAKISTAN	Pretibial blistering, Patent ductus arteriosus	0.131	Positive	NM_000494.4(COL17A1):c.3067C>T; p.(Gln1023*)	Homozygous	Father Mother	Epidermolysis bullosa, junctional 4, intermediate	AR	PVS1,PM2,PP4_M	Pathogenic				CYP2C9*3 (rs1057910)	5:22	57:23	7:10	69:55	Yes	porphylactic antibiotics , topical antibiotics and antiseptic measures in wound care			Dermatology, Plastic surgery and wound care team
58	F60-RWGS-24-114-P	F	0	JORDAN	Respiratory distress, Hypoglycemia, Rhabdomyoma, Rhabdomyoma of heart, Small for gestational age, Newborn affected by intrauterine growth restriction, 37 weeks gestation of pregnancy	0.029	Positive	NM_000069.3(CACNA1S):c.502C>T; p.(Arg168*)	Heterozygous	Mother	Thyrotoxic periodic paralysis, susceptibility to, 1	AD	PVS1,PM2	Likely pathogenic			NM_000110.4(DPYD):c.257C>T; p.(Pro86Leu)	F5 (rs6025)	29:31	61:02	5:40	96:14	No
																	NM_015404.4(WHRN):c.2332C>T; p.(Arg778*)
59	F61-RWGS-24-117-P	F	3	UNITED ARAB EMIRATES	Overlapping toe, Hyperkalemia, Premature birth	0.152	Positive	NM_002292.4(LAMB2):c.1405+1G>A;p.?	Homozygous	Father Mother	Pierson syndrome	AR	PVS1,PM2,PP4_M	Pathogenic			NM_000104.4(CYP1B1):c.182G>A; p.(Gly61Glu)	CYP2C9*2 (rs1799853)	6:32	51:51	8:42	67:05	Yes	Avoided all nephrotoxic drugs. Started albumin infusions and PD		Inserted central line	Ophthalmology. Continued with nephrology team care.
																	NM_000410.4(HFE):c.187C>G; p.(His63Asp)	CYP2D6*41 (rs28371725)
																		CYP2D6*4 (rs3892097)
60	F62-RWGS-24-120-P	M	30	SUDAN	Macrocephaly, Polydactyly, Syndactyly, Posterior fossa cyst, Congestive heart failure, Double outlet right ventricle, VSD shunting L to R, Right aortic arch, Left SVC to dilated CS, Global developmental delay, Hypotonia, Mildly obstructive cortriatriatum, Atrial septal defect, Transient focal atrial tachycardia	0.129	Positive	NM_023073.4(CPLANE1):c.140C>T; p.(Ser47Leu)	Homozygous	Father Mother	Orofaciodigital syndrome VI	AR	PP3,PM3,PP4_M,PM2	Likely pathogenic				CYP3A5*6 (rs10264272)	6:54	59:30	14:53	81:18	No
																		CYP2C9*3 (rs1057910)
61	F63-RWGS-24-123-P	M	121	PHILIPPINE	Subdural hemorrhage, Hemorrhage of the eye, Seizure	0.008	Negative										NM_203447.4(DOCK8):c.3234+2T>; p.?		5:39	108:55	7:59	122:33	No
62	F64-RWGS-24-126-P	M	17	UNITED ARAB EMIRATES	Premature birth, Hypoglycemia, Respiratory distress	0.115	Positive	NM_000352.6(ABCC8):c.563A>G; p.(Asn188Ser)	Heterozygous	Father	Hypoglycemia of infancy, leucine-sensitive	AD	PS3,PS4,PP3,PM2	Pathogenic			NM_000520.6(HEXA):c.2T>C; p.(Met1Thr)		4:59	48:19	1:44	55:03	Yes	Planned to stop diazoxide	PET scan was required	Performed more quickly, The genetic test confirmed the focal type of congenital hyperinsulinemia so the surgical treatment was the resction of the focal pancreatic lesion instead of near total pancreatectomy	Pediatric surgery
																	NM_000517.6(HBA2):c.95+2_95+6del; p.?
																	NM_000350.3(ABCA4):c.3639CCA[1]; p.(His1215del)
																	NM_000517.6(HBA2):c.95+2_95+6del; p.?
63	F65-RWGS-24-129-P	M	4	YEMEN	Metabolic acidosis, Premature birth	0.045	Positive	NM_000126.4(ETFA):c.830C>T; p.(Ala277Val)	Homozygous	Father Mother	Glutaric acidemia IIA	AR	PM3,PP3,PM2,PP4_M	Likely pathogenic	NM_000059.4(BRCA2):c.7480C>T; p.(Arg2494*)		NM_000070.3(CAPN3):c.1466G>A; p.(Arg489Gln)	CYP3A5*7 (rs41303343)	19:40	44:32	6:58	71:11	Yes		Prombted ECHO for cardiopathy monitoring		Pediatric cardiology and neurodevelopment
																		CYP2C9*2 (rs1799853)
																		CYP2D6*4 (rs3892097)
64	F66-RWGS-24-132-P	F	0	UNITED ARAB EMIRATES	Neonatal respiratory distress, Clubbing of toes	0	Negative										NM_001281723.3(BTD):c.1270G>C; p.(Asp424His)	NUDT15*3 (rs116855232)	4:22	43:10	1:37	49:09	No
																		CYP2B6*5 (rs3211371)
65	F67-RWGS-24-135-P	M	2	UNITED ARAB EMIRATES	Cerebral AV malformation, Premature infant of 36 weeks gestation, Respiratory distress of newborn, Hyponatremia of newborn, Convulsions in newborn, Hypotension, Congenital chylothorax	0	Positive	NM_002890.3(RASA1):c.2131C>T; p.(Arg711*)	Heterozygous	Father	Capillary malformation-arteriovenous malformation	AD	PVS1,PM2,PP1	Pathogenic		NM_000410.4(HFE):c.187C>G; p.(His63Asp) NM_000410.4(HFE):c.1006+1G>A;p.?			28:24	46:42	1:18	76:24	Yes		Prombted imaging to look for the AV sites		Interventional radiologist
																NM_000065.5(C6):c.1352dup; p.(Tyr451*) NM_000065.5(C6):c.821del; p.(Gln274Argfs*46)
66	F68-RWGS-24-138-P	M	328	SUDAN	Severe respiratory distress secondary to cardiogenic shock, Dilated cardiomyopathy, Subtle dysmorphism	0	Negative										NM_000055.4(BCHE):c.293A>G; p.(Asp98Gly)		32:29	51:11	7:45	91:25	Yes	De-escalated and stopped inotropes	Eliminated further testing			Allow natural death signed
																	NM_000518.5(HBB):c.20A>T; p.(Glu7Val)
67	F69-RWGS-24-141-P	M	160	USA - UNITED STATES OF AMERICA Origin - Lebanese	Seizure, Hypotonia, Lactic acidosis, Brain imaging abnormality, Global developmental delay, Exotropia, Neurodegeneration	0	Positive	NM_001171155.2(PET100):c.3G>C; p.(Met1?)	Homozygous	Father Mother	Mitochondrial complex IV deficiency, nuclear type 12	AR	PS1,PVS1,PM2	Pathogenic				F5 (rs6025)	4:12	45:13	0:31	49:56	Yes		Eliminated further testing or imaging		Clinical dietitian, genetic, neurodevelopment. Continued with metabolic and neurology.
																		TPMT*3C (rs1142345)
																		TPMT*3B (rs1800460)
																		CYP2C19*4A/B (rs28399504)
																		CYP2C9*2 (rs1799853)
																		CYP2D6*41 (rs28371725)
68	F70-RWGS-24-144-P	M	0	UNITED ARAB EMIRATES	Omphalocele, Rhabdomyoma of heart, Pericardial effusion	0	Negative										NM_000016.6(ACADM):c.928G>A; p.(Gly310Arg)	CYP2C9*2 (rs1799853)	6:05	157:48	5:24	169:18	No
																	NM_000441.2(SLC26A4):c.2174_2177dup; p.(Leu727Tyrfs*28)	CYP2D6*41 (rs28371725)
69	F71-RWGS-24-147-P	M	2295	PAKISTAN	Hypotonia, Cerebral palsy, Oculogyric crisis, Lower-limb joint contracture, Global developmental delay	0	Negative										NM_213607.3(CCDC103):c.461A>C; p.(His154Pro)	CYP2C9*3 (rs1057910)	5:43	61:38	50:13	117:34	No
70	F72-RWGS-24-150-P	M	0	PAKISTAN	Seizure, nonketotic hypoglycemia	0	Negative										NM_000507.4(FBP1):c.841G>A; p.(Glu281Lys)		5:41	60:54	17:16	83:51	Yes	stopped and avoided	Eliminated further genetic and metabolic testing
71	F73-RWGS-25-153-P	M	5802	PAKISTAN	Dystonia, Epilepsy, Global developmental delay, Choreoathetosis, Cerebral palsy	0.068	Positive	NM_016529.6(ATP8A2):c.1782+2T>C;p.?	Homozygous	Father Mother	Cerebellar ataxia, impaired intellectual development, and dysequilibrium syndrome 4	AR	PVS1,PM2	Likely pathogenic			NM_000341.4(SLC3A1):c.1400T>A; p.(Met467Lys)		5:32	47:24	1:47	54:44	Yes		Eliminated the need for further neuroimaging		Prombted
								NM_005334.3(HCFC1):c.5705G>A; p.(Ser1902Asn)	Hemizygous	Mother	Methylmalonic aciduria and homocysteinemia, cblX type	XLR	PM2,BP4	Uncertain significance			NM_000155.2(GALT):c.-119_-116delGTCA; p.?
																	NM_183235.3(RAB27A):c.240-2A>C; p.?
																	NM_006348.5(COG5):c.847C>T; p.(Arg283*)
72	F74-RWGS-25-156-P	M	0	UNITED ARAB EMIRATES	Premature birth, Acute kidney injury, Hepatomegaly, Subarachnoid hemorrhage, Hypokalemia, Hypocalcemia, Hematuria, Disseminated intravascular coagulation	0	Negative										NM_206933.4(USH2A):c.7595-2144A>G; p,?	CYP2C9*2 (rs1799853)	23:36	89:00	3:45	116:21	No
																	NM_173076.3(ABCA12):c.5848C>T; p.(Arg1950*)
73	F75-RWGS-25-159-P	M	0	UNITED ARAB EMIRATES	Abnormal facial shape, Enlarged cisterna magnam Intrauterine growth retardation, Renal aplasia, Abnormal heart morphology, Coarctation of aorta, Hypospadias, Neonatal respiratory distress, Dysplastic tricuspid valve	0	Positive	Trisomy 18		De novo				Pathogenic		NM_000402.4(G6PD):c.653C>T;p.(Ser218Phe)	NM_000518.5(HBB):c.20A>T; p.(Glu7Val)		29:18	85:26	0:46	115:30	Yes	Stopped prostin	eliminated further testing	avoided surgery		Comfort care and allow natural death
74	F76-RWGS-25-162-P	F	0	JORDAN	Skeletal dysplasia, Multiple fractures	0.13	Positive	NM_022356.4(P3H1):c.9dup; p.(Arg4Thrfs*33)	Homozygous	Father Mother	Osteogenesis imperfecta, type VIII	AR	PVS1,PM2	Likely pathogenic			NM_000372.5(TYR):c.1217C>T; p.(Pro406Leu)	CYP2D6*41 (rs28371725)	5:25	56:10	9:22	70:57	Yes	Started Bisphosphonate	eliminated further genetic testing. ECHO was added.		Ophthalmology, genetic, physiotherapy. Orthopedic and continued with Endocrine.
																	NM_000402.4(G6PD):c.466A>G; p.(Asn156Asp)
																	NM_000243.3(MEFV):c.2177T>C; p.(Val726Ala)
																	NM_000492.4(CFTR):c.1210-11T>G; p.?
																	NM_000506.5(F2):c.*97G>A; p.?
75	F77-RWGS-25-165-P	F	0	UNITED ARAB EMIRATES	Abnormal heart morphology, Pulmonary artery atresia, Ventricular septal defect, Hydranencephaly, Hydrocephalus	0.126	Positive	NM_016030.6(TRAPPC12):c.1603+5G>C;p.?	Homozygous	Father Mother	Encephalopathy, progressive, early-onset, with brain atrophy and spasticity	AR	PM3_S,PM2,PP4_M	Likely pathogenic			NM_000350.3(ABCA4):c.5882G>A; p.(Gly1961Glu)	CYP2C9*2 (rs1799853)	9:10	58:40	12:16	80:07	Yes	Stopped prostin	Eliminated the need for additional evaluation	avoided surgical intervention		Comfort care and allow natural death
																	NM_000518.4(HBB):c.364G>C; p.(Glu122Gln)
76	F78-RWGS-25-168-P	M	0	EGYPT	Rhabdomyoma	0.004	Negative										NM_000055.4(BCHE):c.435_436insG; p.(Phe146fs)	CYP2D6*4 (rs3892097)	8:30	74:42	14:24	97:37	Yes		Eliminated further testing for TS
77	F79-RWGS-25-171-P	M	259	SYRIAN ARAB REPUBLIC	Cholestasis, Lung hypoplasia, Bradycardia	0.131	Negative										NM_000243.3(MEFV):c.2177T>C; p.(Val726Ala)	CYP2D6*4 (rs3892097)	71:55	70:26	1:36	143:58	No
78	F80-RWGS-25-174-P	M	4124	SAUDI ARABIA	Cerebral edema, Cerebral hemorrhage, Intracranial hemorrhage, Atelectasis	0	Negative										NM_000055.2(BCHE):c.1253G>T; p.(Gly418Val)	CYP2B6*5 (rs3211371)	22:15	72:48	1:39	96:43	No
																	NM_000155.2(GALT):c.-119_-116delGTCA; p.?
																	NM_004482.4(GALNT3):c.1524+1G>A; p.?
79	F81-RWGS-25-177-P	F	178	UNITED ARAB EMIRATES	Adrenal calcification	0.005	Positive	NM_000235.4(LIPA) 18.6Kb deletion including exons 1-3	Homozygous	Father Mother	Wolman disease	AR		Pathogenic			NM_000414.4(HSD17B4):c.302+3_302+6del; p.?	CYP2B6*5 (rs3211371)	3:55	45:44	0:55	50:36	Yes	Started Enzyme replacement with SEBELIPASE ALFA (Kanuma)	Eliminated the need for additional evaluation		Prombted
								NM_001242896.3(DEPDC5):c.190A>T(p.Lys64*)	Heterozygous	Father	Familial focal epilepsy with variable foci 1	AD	PVS1,PM2	Likely pathogenic			NM_000243.3(MEFV):c.2230G>T; p.(Ala744Ser)	CYP2C9*2 (rs1799853)
																	NM_002693.3(POLG):c.926G>A; p.(Arg309His)
80	F82-RWGS-25-180-P	M	3	UNITED ARAB EMIRATES	Citrullinemia type I, Hyperammonemia, AKI (acute kidney injury)	0.177	Positive	NM_054012.4(ASS1):c.469C>T; p.(Arg157Cys)	Homozygous	Father Mother	Citrullinemia type I	AR	PS3,PM3,PM2,PM5	Pathogenic				CYP2D6*17 (rs28371706)	4:20	62:54	1:01	68:15	Yes	Confirmed continuation			Continued same
																		CYP2D6*41 (rs28371725)
																		CYP2C9*2 (rs1799853)
81	F83-RWGS-25-183-P	M	0	UNITED ARAB EMIRATES	Abnormal facial shape, Low-set ears, Shield chest, Microretrognathia, Cataract, Hypospadias, Hyponatremia	0	Positive	NM_014159.7(SETD2):c.5218C>T; p.(Arg1740Trp)	Heterozygous	De novo	Luscan-Lumish syndrome	AD	PS2,PM2,PP3,PM5	Pathogenic			NM_019616.4(F7):c.1025G>A; p.(Arg342Gln)	CYP2C9*2 (rs1799853)	17:51	49:36	1:44	69:12	Yes		Eliminated further testing		Genetics and neurodevelopment. Rest continued
																	NM_000155.2(GALT):c.-119_-116delGTCA; p.?
82	F84-RWGS-25-186-P	F	345	PAKISTAN	Failure to thrive, Global developmental delay, Cataract, Hepatomegaly, Calcinosis, Hypoglycemia, Lactic acidosis, Decreased liver function, Vascular calcification	0.245	Positive	NM_002437.5(MPV17):c.107A>C; p.(Gln36Pro)	Homozygous	Father Mother	Mitochondrial DNA depletion syndrome 6 (hepatocerebral type)	AR	PM3,PP3,PM2,PP4_M	Likely pathogenic			NM_002016.2(FLG):c.6109C>T; p.(Arg2037*)	NUDT15*3 (rs116855232)	4:11	42:06	1:22	47:39	Yes		Eliminated further testing			Allow natural death signed
																	NM_000506.5(F2):c.*97G>A; p.?	CYP2B6*5 (rs3211371)
																	NM_001609.4(ACADSB):c.443C>T; p.(Thr148Ile)
																	NM_001370658.1(BTD):c.1270G>C; p.(Asp424His)
																	NM_153766.3(KCNJ1):c.601C>T; p.(Leu201Phe)
83	F85-RWGS-25-189-P	M	625	OMAN	Pulmonary hypertensive crisis, Acidosis, Hyperglycemia, Abnormal facial shape, Macrocephaly, Low-set ears, Generalized hypotonia	0.085	Positive	NM_001749.4(CAPNS1):c.391+1G>A;p.?	Homozygous	Father Mother	Pulmonary hypertension, primary, 6	AR	PVS1,PM2	Likely pathogenic			NM_004646.4(NPHS1):c.3250dup; p.(Val1084fs*12)	CYP2C9*2 (rs1799853)	24:21	44:03	1:26	69:51	Yes	Yes			Yes
								NM_138694.4(PKHD1):c.4870C>T; p.(Arg1624Trp)	Compound heterozygous	Father	Polycystic kidney disease 4, with or without hepatic disease	AR	PS4,PM3_S,PM2,PP4	Pathogenic				CYP2C9*3 (rs1057910)
								NM_138694.4(PKHD1):c.6041A>G; p.(Tyr2014Cys)		Mother			PM3,PM2,PM1,PP4_M	Likely pathogenic
84	F86-RWGS-25-192-P	F	378	INDIA	Immunodeficiency, Thrombocytopenia, Pancytopenia	0	Inconclusive	NM_022168.4(IFIH1):c.554T>C; p.(Leu185Pro)	Heterozygous	Mother	Aicardi-Goutieres syndrome 7	AD	PM2,PP3	Uncertain significance			NM_213607.3(DNAAF19):c.461A>C; p.(His154Pro)	CYP2D6*41 (rs28371725)	48:04	39:25	4:30	91:59	No
																	NM_000352.6(ABCC8):c.4353G>A; p.(Trp1451*)
																	NM_000155.2(GALT):c.-119_-116delGTCA; p.?
85	F87-RWGS-25-197-P	M	237	UNITED ARAB EMIRATES	Abnormal heart morphology, Anemia, Transposition of the great arteries, Dextrotransposition of the great arteries, Abnormal facial shape, Abnormal vertebral morphology, Low-set ears, Scoliosis	0.015	Positive	NM_000053.4(ATP7B):c.2668G>A; p.(Val890Met)	Homozygous	Father Mother	Wilson Disease	AR	PM3,PP1,PP3,PM1,PM5	Pathogenic				CYP2B6*5 (rs3211371)	4:16	63:18	4:45	72:19	No
																		CYP2D6*4 (rs3892097)
86	F88-RWGS-25-198-P	F	0	PAKISTAN	Ambiguous genitalia, Lactic acidosis, Metabolic acidosis	0.136	Negative										NM_004004.6(GJB2):c.231G>A; p.(Trp77*)	CYP2D6*41 (rs28371725)	22:48	42:00	8:21	73:09	Yes	Thiamine was stopped	Yes
																	NM_000055.2(BCHE):c.293A>G; p.(Asp98Gly)
87	F89-RWGS-25-201-P	F	177	UNITED ARAB EMIRATES	Seizure, Hypoglycemia, Hyperammonemia, Abnormality of metabolism/homeostasis	0.145	Positive	NM_000016.6(ACADM):c.362C>T;p.(Thr121Ile)	Homozygous	Father Mother	Medium-chain acyl-coenzyme A dehydrogenase deficiency	AR	PS3, PM3_S, PM2,PP3	Pathogenic			NM_000402.4(G6PD):c.466A>G; (p.Asn156Asp)	CYP2D6*41 (rs28371725)	52:06	40:16	5:01	97:23	Yes	Started/Stopped? anticonvulsant medications			Clinical dietician
																		CYP2C9*2 (rs1799853)
88	F90-RWGS-25-204-P	M	69	PAKISTAN	Seizure, Hypernatremia, Anonychia, Absent toenail, Absent fingernail	0.193	Positive	NM_001199107.2(TBC1D24):c.358T>C; p.(Cys120Arg)	Homozygous	Father Mother	DOORS Syndrom	AR	PM3,PP3,PM2,PP4_M	Likely pathogenic			NM_003060.4(SLC22A5):c.641C>T; p.(Ala214Val)		25:51	39:54	5:15	71:01	Yes	Avoided antiviral therapy	Avoided LP looking HSV in CSF and blood		Audiology, orthopedics and neurodevelopment
89	F91-RWGS-25-207-P	F	22	INDIA	Tracheoesophageal fistula, Choanal atresia, absent left kidney	0	Positive	4.5 MB deletion in Chr1:818022-5385821	Heterozygous	De novo				Pathogenic			NM_000410.4(HFE):c.187C>G; p.(His63Asp)	NUDT15*3 (rs116855232)	45:01	160:40	6:33	212:14	No
								1.3 Mb deletion in chr22:16558361-17932494	Heterozygous	De novo				Pathogenic			NM_000155.2(GALT):c.-119_-116delGTCA; p.?
90	F92-RWGS-25-210-P	M	0	INDIA	Neonatal hyperbilirubinemia, Diarrhea, Metabolic acidosis	0.153	Positive	NM_001080467.3(MYO5B):c.1499T>C; p.(Ile500Thr)	Homozygous	Father Mother	Cholestasis, progressive familial intrahepatic, 10	AR	PM3,PP3,PM2,PP4_M	Likely pathogenic			NM_001256317.3(TMPRSS3):c.413C>A; p.(Ala138Glu)	CYP2B6*5 (rs3211371)	21:02	131:24	9:35	162:02	Yes	Yes	Yes		Gastroentroloy
91	F93-RWGS-25-213-P	M	30	UNITED ARAB EMIRATES	Hydrops fetalis, Hypocalcemia, Ascites, Tachycardia	0.03	Positive	NM_000434.4(NEU1):c.1186G>A; p.(Gly396Ser)	Homozygous	Father Mother	Sialidosis, type I	AR	PM3,PM2,PP3,PP4_M	Likely pathogenic		NM_000518.5(HBB):c.92+5G>C;p.?	NM_016038.4(SBDS):c.184A>T; (p.Lys62*)		26:19	134:34	14:17	175:10	Yes		Eliminated the need for additional evaluation		Metabolic	Palliative care. No specific therapeutic interventions available for this condition Only supportive care.
																	NM_016038.4(SBDS):c.258+2T>C; p.?
92	F94-RWGS-25-216-P	M	1511	PAKISTAN	Pancytopenia, Chronic kidney disease, Failure to thrive, Global developmental delay, Prune belly, Respiratory distress	0.093	Negative											CYP2B6*5 (rs3211371)	26:19	128:18	21:08	175:45	No
93	F95-RWGS-25-219-P	M	5	PHILIPPINE	Metabolic acidosis, Elevated circulating creatinine concentration, Hyponatremia, Hyperkalemia, Hypotension, Acute kidney injury	0.018	Negative											CYP2C19*3 (rs4986893)	26:19	129:12	20:00	175:31	No
94	F96-RWGS-25-222-P	F	0	INDIA	Craniosynostosis, Agenesis of corpus callosum, bilateral CTEV	Duo WGS	Negative										NM_000235.4(LIPA):c.894G>A; p.(Gln298=)	NUDT15*3 (rs116855232)	73:54	142:50	8:12	224:56	No
																	NM_000342.4(SLC4A1):c.1199_1225del; p.(Ala400_Ala408del)
95	F97-RWGS-25-224-P	F	112	UNITED ARAB EMIRATES	Hypoglycemia, Neonatal hyperbilirubinemia, Lactic acidosis, Metabolic acidosis, Acute kidney injury, Cholestatic liver disease	0	Negative										NM_004482.4(GALNT3):c.1244A>G; p.(His415Arg)	CYP2D6*41 (rs28371725)	24:53	58:13	12:55	96:01	Yes	Metablic management avoided	eliminated further genetic and metabolic screening
																	NM_000492.4(CFTR):c.358G>A; p.(Ala120Thr)
																	NM_001370658.1(BTD):c.908A>G; p.(His303Arg)
																	NM_000055.2(BCHE):c.1253G>T; p.(Gly418Val)
96	F98-RWGS-25-227-P	M	17	JORDAN	Atrial septal defect, Ventricular septal defect, Patent ductus arteriosus, Cardiomegaly, Low-set ears, Retrognathia, Abnormal renal pelvis morphology, Hydronephrosis, Increased circulating isovaleric acid concentration	0.102	Positive	NM_139078.3(MAPKAPK5):c.592C>T; p.(Gln198*)	Homozygous	Father Mother	Neurocardiofaciodigital syndrome	AR	PVS1,PM2,PP4	Pathoenic			NM_000500.9(CYP21A2):c.92C>T; p.(Pro31Leu)		52:56	126:15	13:19	192:30	Yes		eliminated further metabolic testing		Neurology and continued with the rest
97	F99-RWGS-25-230-P	F	0	UNITED ARAB EMIRATES	Neonatal respiratory distress	0.01	Positive	NM_021147.5(CCNO):c.259_268dup; p.(Val90Glyfs*49)	Homozygous	Father Mother	Primary ciliary dyskinesia 29+L191	AR	PVS1,PM2,PP4	Pathoenic			NM_033056.4(PCDH15):c.4604_4608dup; p.(Ser1537fs)	CYP2C9*2 (rs1799853)	24:42	187:12	2:26	214:20	Yes	Saline and suction			Pulmonology and ENT
																	SMN1 (NC_000005.10) 28 Kbp deletion
98	F100-RWGS-25-233-P	F	362	INDIA	cystic fibrosis, Ciliary dyskinesia, Bronchiolitis, Respiratory failure	0	Negative										NM_000492.4(CFTR):c.1210-11T>G; p.?		29:18	216:13	16:13	261:44	Yes		eliminated further testing, treated as a case of acute bronchiolitis, the severity of the case could be explained by history of prematurity
99	F101-RWGS-25-236-P	F	252	UNITED ARAB EMIRATES	Dystonia, Mild malformation of cortical development, Severe global developmental delay	0	Positive	NM_004992.4(MECP2):c.529A>C; p.(Lys177Gln)	Heterozygous	De novo	Rett syndrome	XLD	PS2,PP4_M,PP3,PM2	Likely pathogenic					7:24	231:41	7:34	246:39	Yes	Added medications for dystonia	Prombted further testing of Skewed X-inactivation testing (AR)		Pulmonology, sleep study, neurodevelopment, Rett clinic
100	F102-RWGS-25-239-P	M	0	INDIA	PDA, singly umbilical artery, metabolc asidosis, suspected coloboma, extreme prematurity of newborn, penoscrotal hypospadias	0	Negative												24:35	175:31	35:04	235:10	No

## Sheet: S3-Control Cohort
SN	Case ID	Gender	Age at Presentation (days)	Nationality	Clinical Indications	Genetic Testing	Test Result	TAT	Overall Result	Further Details	Change in NICU/PICU Management	Medication/Diet	Diagnostics	Surgical/ Procedural	Sub-speciality consultation	Palliative Care/ AND
1	C001	M	258	EMIRATI	Acute respiratory distress(R06.03)	Exome-Based Custom Panel	Positive	105	Positive	Heterozygous pathogenic variant (Asn159Ser) in IKZF1. April 12, 2023: testing parents (AGC-22-1761 and AGC-22-1762) showed that this variant is de novo.	No, results came after discharge
2	C002	M	30	PAKISTANI	High immunoreactive trypsinogen on newborn screening(R76.8), Tetralogy of Fallot(Q21.3),Pulmonary atresia(Q22.0)/ K/C of Tetrology of Fallot	Chromosome microarray analysis	Negative	36	Negative		No
						Single Gene Sequencing	Negative	66
3	C003	M	9	MAURITANIAN	Complete atrioventricular septal defect (CAVSD)(Q21.2),Bicuspid aortic valve(Q23.1),Severe aortic stenosis(I35.0)	Exome-Based Custom Panel	Negative	79	Negative		No
						Chromosome microarray analysis	Negative	36
4	C004	F	2	INDIAN	VSD (ventricular septal defect)(Q21.0),ASD secundum(Q21.1),Atresia of esophagus with esophageal fistula(Q39.1)	Chromosome microarray analysis	Negative	39.9662	Negative		No
5	C005	F	106	EMIRATI	Cardiomyopathy(I42.9)	Exome-Based Custom Panel	Positive	70	Positive	1 homozygous pathogenic variant (Tyr928Cys) in GAA (pompe disease) and two het VUSs in TTN and RYR2. May 4, 2023: Parental testing (AGC-23-563 and AGC-23-574) showed that both parents are heterozygous for the GAA variant, while TTN is inherited from mother suggesting that it is more likely benign.	Yes	Enzyme replacement therapy started			Yes
6	C006	F	5	YEMENI	Diaphragmatic hernia congenital(Q79.0),Pneumothorax on left(J93.9),Hypotension(I95.9),Mitral regurgitation(I34.0) // In view of diapharagmatic hernia with plamar felxion, left ventricular dysfucntion (heart)	Chromosome microarray analysis	Inconclusive	49	Inconclusive	1MB deletion - likely positive	No, results came after discharge
7	C007	M	4226	EMIRATI	Acute flaccid paralysis(G81.00)	Whole Exome Sequencing	Negative	31	Negative		No
8	C008	F	4033	EMIRATI	Abnormal movements(R25.9),Seizure(R56.9),Development delay(R62.50),Hypogammaglobulinemia(D80.1)	Whole Exome Sequencing	Negative	49	Negative		No
9	C009	F	2466	EMIRATI	Hepatic dysfunction(K76.9),Encephalopathy acute(G93.40), Acute liver failure with hepatic coma(K72.01),Hyperammonemia(E72.20)	Whole Exome Sequencing	Inconclusive	53.4251	Inconclusive	Heterozygous de novo variant (Arg147His) in NPRL3	No, results came after discharge
10	C010	F	0	EMIRATI	Persistent metabolic acidosis	Karyotype/FISH	Negative	8	Negative		No
11	C011	F	189	INDIAN	HLH	Exome-Based Custom Panel	Negative	49	Negative		No, results came after discharge
12	C012	F	215	YEMENI	Muscle hypotonia(M62.89), Cyanosis(R23.0),Abnormal movements(R25.9)	SMN1/SMN2 Copy Number Analysis	Negative	13	Negative		No
13	C013	F	91	UKRANIAN	VSD (ventricular septal defect)(Q21.0),PDA (patent ductus arteriosus)(Q25.0),CRP elevated(R79.82),Wheeze(R06.2),Congestive heart failure (CHF)(I50.9)	Whole Exome Sequencing	Negative	182	Negative		No
						Chromosome microarray analysis	Negative	32
14	C014	F	0	EMIRATI	bilateral cleft lip and palat and dextrocardia	Karyotype	Negative	14	Negative		No
15	C015	M	0	EMIRATI	Dysmorphic features with hepatomegaly with renal anomalies, and congenital heart disease	Chromosome microarray analysis	Negative	35	Negative		No
						Karyotype	Negative	12
16	C016	F	0	EMIRATI	Harlequin ichthyosis	Exome-Based Custom Panel	Inconclusive	109	Inconclusive	Het VUS in LOR gene	No, results came after discharge
17	C017	M	0	EMIRATI	Dysmorphism, neonatal seizure with bilateral periventricular leukomalacia, congenital hypothyroidism, bilateral microphakia, , aracnodactyly	Whole Exome Sequencing	Inconclusive	70	Inconclusive		No
						Chromosome microarray analysis	Negative	20
						Karyotype	Negative	8
18	C018	M	6	EMIRATI	TGA (transposition of great arteries)(Q20.3),Pulmonary atresia(Q22.0),Congenital heart defect(Q24.9)	Chromosome microarray analysis	Negative	41	Negative	9% LOH	No
19	C019	F	0	SUDANESE	Dysmorphism, seizure and dandy walker malformation	Karyotype	Negative	8	Negative		No
20	C020	F	22	EMIRATI	PDA (patent ductus arteriosus)(Q25.0)	Karyotype	Positive	8	Positive	Trisomy 13	Yes			Yes	Yes
						Chromosome microarray analysis	Positive	23		Trisomy 13
21	C021	F	156	EMIRATI	Dilated cardiomyopathy(I42.0)	Exome-Based Custom Panel	Inconclusive	51	Inconclusive	SCN5A,c.2497 G>A p.(G833R),Autosomal dominant Heterozygous VUS, TNNC1,c.433 G>A p.(D145N) Autosomal dominant Heterozygous VUS, TNNT2, c.94 G>C p.(D32H) Autosomal dominant Heterozygous VUS.	No
22	C022	M	10	EMIRATI	Hyperkalemia(E87.5)	Whole Exome Sequencing	Positive	72	Positive	SCNN1G,c.412 C>T p.(R138*) ,Autosomal Recessive,Homozygous Pathogenic Variant.	No, results came after discharge
23	C023	F	0	EMIRATI	Hyponatremia and hyperkalemia with family history of pseudohypoaldosteronism Type 1 (homozygous SCNN1A mutation)	Sanger Sequencing	Positive	21	Positive	Pathogenic homozygous variant, c.203_204delTC; (p.Ile68ThrfsTer76) in exon 2	No, results came after discharge
24	C024	F	1	EMIRATI	Acute intestinal obstruction(K56.609)	Exome-Based Custom Panel	Negative	86	Inconclusive		No
						Chromosome microarray analysis	Inconclusive	74		2 het VUS dups at 2q36 (145kb) and 6q13 (656kb) and 8% LoH
25	C025	F	2	PAKISTANI	PA-VSD (pulmonary atresia with ventricular septal defect)(Q21.0),Fallot tetralogy(Q21.3)	Chromosome microarray analysis	Inconclusive	72	Inconclusive	One het deletion (66Kb) VUS removing one exon in CTNNA3 (can be inframe).	No
26	C026	F	340	EMIRATI	Acute liver failure(K72.00)	Exome-Based Custom Panel	Negative	56	Negative	Previously reported COL1A1 pathogenic variant was identified but not reported as not part of this liver disease panel	No
27	C027	M	7	EMIRATI	TGA (transposition of great arteries)(Q20.3)	Chromosome microarray analysis	Inconclusive	38.038	Inconclusive	1 dup (636kb) VUS on the pseudoautosoaml region of XY	No
28	C028	M	4401	EMIRATI	Acute disseminated demyelination, unspecified(G36.9),H/O encephalitis(Z86.61)	Whole Exome Sequencing	Negative	85	Negative		No
29	C029	M	0	UNKNOWN	Meningomyelocele(Q05.9),PDA (patent ductus arteriosus)(Q25.0),Imperforate anus(Q42.3)	Chromosome microarray analysis	Inconclusive	37	Inconclusive	1 dup VUS (533kb) at 7p12.3	No, results came after discharge
30	C030	F	1	EMIRATI	VSD (ventricular septal defect)(Q21.0),ASD secundum(Q21.1),PDA (patent ductus arteriosus)(Q25.0),Anal atresia(Q42.3),Anorectal malformation(Q43.9)	Chromosome microarray analysis	Positive	41.0051	Positive	Trisomy 21	No, results came after discharge
31	C031	M	0	COMORAN	Dandy Walker malformation, Agenesis of corpus callosum, Colpocephaly, Cleft palate, Bilateral optic disc hypoplasia, Sacral scoliosis, Tethering of the spinal cord,, Musculoskeletal anomalies, Facial dysmorphism	Chromosome microarray analysis	Positive	14	Positive	20.24 Mb deletin in 6q25.1-q27	Yes		Yes		Yes
						Karyotype/FISH	Positive	12		46,XY,del(6)(?q25 )
32	C032	F	0	LEBANESE	VACTERL association(Q87.89),Family history of genetic disorder(Z84.89)	Exome-Based Custom Panel	Negative	50	Negative		No
33	C033	F	151	INDIAN	Status epilepticus(G40.901),Seizures(R56.9)	Exome-Based Custom Panel	Inconclusive	17	Inconclusive	1 het VUS in POLG	No, results came after discharge
34	C034	M	0	TUNISIAN	Dysmorphic features, ocular albinism, generalized hypotonia, dolichocephaly, clinodactyly	Chromosome microarray analysis	Positive	42	Positive	6.2Mb pathogenic deletion at 15q11.2q13.1 chromosomal region.	No, results came after discharge
						Karyotype	Positive	10		Chromosomal Microarray detected a 6.2Mb pathogenic deletion at 15q11.2q13.1 chromosomal region.
35	C035	F	0	YEMENI	generalized hypotonia, poor sucking and swallowing, subtle facial dysmorphic features, and bilateral talipes equinovarus with overlapping toe	Chromosome microarray analysis	Negative	34	Negative		No
36	C036	F	0	EMIRATI	Respiratory distress syndrome of newborn	Chromosome microarray analysis	Positive	47	Positive	14.5Mb deletion at 14q11.2q13.1	Yes		Yes
						Karyotype	Positive	23		Robertsonian translocation between chromosomes 14 and 22
37	C037	F	1	EMIRATI	Intestinal atresia(Q41.9),Volvulus(K56.2),Respiratory distress of newborn(P22.9), At risk for neonatal intestinal obstruction(Z91.89),Discharge from eye(H57.8)	Exome-Based Custom Panel	Negative	53	Positive	Patient has Turner 45X (AGC-22-426) which is why we saw a sex chrosomome discrepancy between AiLife and VarSeq	Yes		Yes		Yes
						Chromosome microarray analysis	Positive	36.0176		45X and two VUSs (1 triplication 150kb inclduing DOCK8 ay 9p24.3 and another het del 300kb at 9p24.1 - no genes). 3.3% LoH
38	C038	F	3	EGYPTIAN	Hyperammonemia(E72.20)	Whole Exome Sequencing	Inconclusive	83	Inconclusive	Likely positive homozygous VUS in CPS1 which is consistent with patient hyperammonia	No, results came after discharge
39	C039	M	0	EMIRATI	Microcephaly, IUGR, ASD, subtle dysmorphic features	Chromosome microarray analysis	Negative	39	Negative		No
						Karyotype	Negative	7
40	C040	F	147	PAKISTANI	Acute respiratory distress syndrome (ARDS)(J80),Hypokalemia(E87.6), Immunocompromised(D84.9)	Exome-Based Custom Panel	Positive	53	Positive	Homozygous pathogenic variant (p.Arg68*) in CD3D	Yes	Yes	Yes	Yes	Yes
41	C041	M	0	INDIAN	Hydronephrosis(N13.30),Posterior urethral valves (PUV)(Q64.2),Renal impairment(N28.9)	Single Gene Sequencing	Inconclusive	51	Inconclusive	1 het VUS (Leu214Val) in CFTR	No
42	C042	M	154	JORDANIAN	Hypoalbuminemia(E88.09),Fever(R50.9),Systemic inflammatory response syndrome(R65.10),Clinical sepsis(A41.9), HLH (hemophagocytic lymphohistiocytosis)(D76.1),Fungal infection(B49)	Exome-Based Custom Panel	Inconclusive	62.9676	Inconclusive	two VUSs in UNC13D (one very weak).	No, died before release of result
43	C043	F	0	EMIRATI	Congenital heart disease, cyanotic(Q24.9),Absent pulmonary valve(Q22.0)	Chromosome microarray analysis	Negative	32.0328	Negative		No
44	C044	M	1	EMIRATI	Diaphragmatic hernia congenital(Q79.0),PDA (patent ductus arteriosus)(Q25.0)	Chromosome microarray analysis	Inconclusive	35	Inconclusive	1.8Mb dup at 8q24 and two regions of LoH at 11p (not including the BWS area)	No
45	C045	F	4528	EMIRATI	ESRD on hemodialysis(N18.6),Atypical hemolytic uremic syndrome(D59.3)	Exome-Based Custom Panel	Inconclusive	56.9568	Inconclusive	1 het VUS in C3 which causes AR or AF aHUS.	No, died before release of result
46	C046	M	0	OMANI	Dysmorphic features, Schizencephaly, agenesis of corpus callosum, Bilateral frontoparietal polymicrogyria	Chromosome microarray analysis	Negative	57	Negative		No
47	C047	F	0	FILIPINO	Extensive Congenital Anomalies Dysmorphism, Microcephaly, Holoprosenceophaly and Dandy -Walker variant, convulsions	Karyotype/FISH	Negative	8	Negative		No
48	C048	M	202	CANADIAN	DCM (dilated cardiomyopathy)(I42.0)	SMN1/SMN2 Copy Number Analysis	Negative	5	Negative		No
						Exome-Based Custom Panel	Negative	56
49	C049	M	235	BRITISH	Thrombopenia(D69.6),Systemic inflammatory response syndrome(R65.10),Hepatosplenomegaly(R16.2),HLH (hemophagocytic lymphohistiocytosis)(D76.1)	Exome-Based Custom Panel	Positive	14	Positive	Two het one P and one LP in UNC13D. Parental testing was recommended to confirm phase. March 31, 2022:parental testing (AGC-22-345 and AGC-22-346) confirmed compund heterozygous state	Yes	Yes	Yes		Yes
50	C050	M	11	RUSSIAN	41 weeks gestation of pregnancy(Z3A.41),Severe aortic valve stenosis(I35.0),Congenital heart disorder(Q24.9),Large for gestational age newborn(P08.1)	Chromosome microarray analysis	Inconclusive	24	Inconclusive	2 het dups: 15q11.2 prader will region (231kb) and 6q14.3 (520kb). Recommended follow up testing (MS-MLPA) if the 15q11.2 is relevant. 31/10/2022" parental testing (AGC-22-1216 and AGC-22-1217) showed that both were inherited from father, and are therefore likley benign.	No, results came after discharge
51	C051	F	100	FILIPINO	`Thrombocytopenia(D69.6),Splenomegaly(R16.1),HLH (hemophagocytic lymphohistiocytosis)(D76.1),Hepatomegaly(R16.0), Systemic inflammatory response syndrome(R65.10)	Sanger Sequencing	Positive	63	Positive	This patient has two heterozygous variants (Arg65* and Ser174Phe) in LIPA identified by rWGS. Testing parents (AGC-22-192 and and AGC-22-193) confirmed in trans. Also enzymatic testing showed abnormal levels suggesting the Ser174Phe is also lik path	Yes	started on enzyme replacement	Yes		Yes
						Karyotype	Negative	10
52	C052	M	5	YEMENI	DORV, ToF type (double-outlet right ventricle, tetralogy of Fallot)(Q20.1),PA (pulmonary valve atresia)(Q22.0)	Chromosome microarray analysis	Negative	28	Negative		No
53	C053	F	10	INDIAN	Acute renal failure(N17.9),Acute respiratory failure(J96.00)	Exome-Based Custom Panel	Negative	39	Negative		No
						Chromosome microarray analysis	Negative	31			No
54	C054	M	49	EMIRATI	Pancytopenia(D61.818)	Whole Exome Sequencing	Negative	78	Negative		No
55	C055	M	7	SOMALI	Hypoplastic left heart(Q23.4)	Chromosome microarray analysis	Inconclusive	38	Inconclusive	1 het dup (465kb) VUS	No
56	C056	F	1	EMIRATI	38 weeks gestation of pregnancy(Z3A.38),Total anomalous pulmonary venous drainage(Q26.2),Transposition of great arteries(Q20.3),Pulmonary atresia(Q22.0),Atrioventricular septal defect (AVSD)(Q21.2) - Term baby. - Heterotaxy / right atrial isomerism. . - Complete AVSD / d-TGA / PA. DA dependant circulation supplying both PAs. Persistent LSVC to left sided atrium. Supracardiac TAPVD to vertical vei…	Chromosome microarray analysis	Negative	29.0485	Negative	14% LOH	No, died before release of result
57	C057	M	10	INDIAN	CHD (congenital heart disease)(Q24.9)	Chromosome microarray analysis	Inconclusive	34	Inconclusive	Carrier of a het deletion in HERC2 and OCA2 and 11% LOH	No
58	C058	F	2	SYRIAN	DORV, VSD (double-outlet right ventricle, ventricular septal defect)(Q20.1),Duodenal atresia(Q41.0) Duodenal atresia with annular pancreas . DORV. Large PM subaortic VSD.. Large fenestrated Sec ASD. Almond shaped eyes, tongue protrusion, overriding of sutures	Chromosome microarray analysis	Negative	31	Negative	1% LOH mostly 11MB on 7q.	No
59	C059	M	0	EMIRATI		Karyotype	Negative	7			No
						Chromosome microarray analysis	Negative	42			No
						Whole Exome Sequencing	Positive	31			No
60	C060	F	185	PAKISTANI	Immune deficiency disorder(D84.9),Reactive airway disease with wheezing with acute exacerbation(J45.901)	Whole Exome Sequencing	Negative	50.9722	Negative		No, results came after discharge
61	C061	M	3	YEMENI	Ambiguous genitalia(Q56.4),Dysmorphism(Q89.9),Retrognathia(M26.19),Respiratory distress of newborn(P22.9)	Chromosome microarray analysis	Positive	37	Positive	Two large duplications (18.2Mb at 11q23 and 3.4Mb at 22q11.1) that are most likely one even based on a previous literature report with similar sized duplications and breakpoints and similar phenotype.	No, results came after discharge
62	C062	M	0	EMIRATI	Taussig-Bing anomaly(Q20.1),D-TGA (dextro-transposition of great arteries)(Q20.3),IAA (interrupted aortic arch)(Q25.21)	Chromosome microarray analysis	Inconclusive	42	Inconclusive	1 duplication VUS (likely benign) 446Kb at 10p15.3	No, results came after discharge
63	C063	F	33	EGYPTIAN	31 weeks gestation of pregnancy(Z3A.31),Dysmorphic features(Q89.7),Heart failure(I50.9),Hypotonia(R29.898),PDA (patent ductus arteriosus)(Q25.0)	Chromosome microarray analysis	Positive	34	Positive	12p trisomy and two VUSs (one 15q11 dup and another deletion on Xq)	Yes		Yes		Yes
64	C064	F	6	JORDANIAN	Cardiogenic shock(R57.0),Decreased cardiac function(R09.89),Shock(R57.9)	Chromosome microarray analysis	Negative	29	Negative		No
65	C065	F	11	EMIRATI	Acquired thrombocytopenia(D69.6),Atresia of small intestine(Q41.9),Chronic lung disease(J98.4) Ileal atresia, Operated, Fragile bones: Femur fracture treated, humerus and leg frature as well , Osteopenia of prematurity, Chronic lung disease , Preterm 26+3 weeks now corrected gestation 41+2 weeks, Femur fracture(S72.90XA),ELBW (extremely low birth weight) infant(P07.00),Chronic lung disease(J98.4)…	Exome-Based Custom Panel	Inconclusive	42	Inconclusive	1 het VUS in COL1A2 (Asn299Thr).	Yes	Yes			Yes
						Chromosome microarray analysis	Negative	40
66	C066	M	0	EMIRATI	DORV with subpulmonary VSD(Q20.1),Coarctation of aorta(Q25.1),S/P PA (pulmonary artery) banding(Z98.890),Aortic valve atresia(Q23.0),Acute respiratory failure(J96.00) DORV. Malposed great arteries. Hypoplastic ascending aorta and hypoplastic aortic arch. Coarctation of the aorta. Atretic aorta. Large inlet VSD, small apical VSD. Large PDA (well opened) . Respiratory distress with respiratory fail…	Chromosome microarray analysis	Inconclusive	39.0456	Inconclusive	1 heterozygous deletion (207kb) reporetd as VUS - affects noncoding region of DLGAP1 which is not strongly linked to disease	No
67	C067	F	15	PAKISTANI	Dysmorphic features(Q89.7),Hypoplastic right heart(Q22.6),History of imperforate anus(Z87.738),Acute respiratory failure(J96.00)	Chromosome microarray analysis	Positive	17	Positive	Mosaic 12p tetrasomy consistent with Pallister-Killian Syndrome	Yes			No cardiac intervention offered		Yes
						Karyotype	Negative	16
68	C068	M	109	EMIRATI	Dysmorphism(Q89.9),Seizures(R56.9). Sultan is an ex-preterm 32 weeks +6 days , corrected age 2 months. He is born to non -consanguineous parents. He has dysmorphic craniofacial features, bilateral hydroureteronephrosis and grade IV bilateral VUR ( on prophylaxis), Seizures ( controlled on Keppra), right hydrocele. He has peripheral hypertonia, with exaggerated DTRs, head lag. He had right inguina…	Chromosome microarray analysis	Negative	28.9687	Negative		No
69	C069	M	14	EMIRATI	hypotonia, undescended testes and subtle dysmorphism	Whole ExomeSequencing	Positive	112	Positive	maternal UPD15	Yes		Yes		Yes
						MS-MLPA	Positive	154		Hypermethylation of the SNPRN locus consistant with Prader willi syndrome
						MLPA	Negative	27
						Karyotype/FISH	Negative	11
70	C070	M	8	EMIRATI	TOF (tetralogy of Fallot)(Q21.3) 1. Preterm 34 weeks, 1.880 kg, AGA. 2. Respiratory distress syndrome of newborn. 3. Tetralogy of Fallot. 4. Neonatal Jaundice. 5. Subtle dysmorphism	Chromosome microarray analysis	Positive	42.0446	Positive	A deletion on chr 4 (7.7Mb) and a duplication on chr 18 (25Mb) suggestive of an unbalaced translocation	No
71	C071	F	49	IRISH	Acute renal failure(N17.9),Anemia(D64.9),Diaper rash(L22),Hypertension(I10),Myelodysplastic disease(C94.6)	Exome-Based Custom Panel	Positive	41	Positive	Homozygous frameshift pathogenic variant in MMACHC (methylmalonic aciduria & homocystinuria cblC type) and heterozygous pathogenic variant in G6PD (Ser188Phe)	No
72	C072	F	3	EMIRATI	Respiratory failure(J96.90),PDA (patent ductus arteriosus)(Q25.0),Neonatal necrotizing enterocolitis(P77.9),Hypoplastic aortic arch(Q25.42),DORV with subpulmonary VSD(Q20.1)	Chromosome microarray analysis	Negative	39.9902	Negative		No
73	C073	F	942	SYRIAN	Hypotonia(R29.898),Failure to thrive-child(R62.51),Cerebral palsy(G80.9),Acute respiratory distress(R06.03)	Exome-Based Custom Panel	Positive	11	Positive	Two homozygous frameshift pathogenic variants in IGHMBP2 (SMA with respiratory distress) and ANO5 (Limb girdle muscle dystrophy)	Yes	Gene therapy offered, but cannot be afforded by family	Yes	Yes	Yes
						SMN1/SMN2 Copy Number Analysis	Negative	2
74	C074	M	8	AFGHAN	CTEV (congenital talipes equinovarus)(Q66.0),Multiple congenital anomalies(Q89.7),Hypotonia(R29.898),Retrognathia(M26.19	Chromosome microarray analysis	Negative	41	Negative	17% LoH	No
75	C075	M	322	KENYAN	Metabolic acidosis(E87.2),Cholangitis(K83.0),Anomaly, spine(Q76.49),Dilated intrahepatic bile duct(K83.8)	Whole Exome Sequencing	Negative	36	Negative		No
						Chromosome microarray analysis	Inconclusive	40	Inconclusive	Carrier of a heterozygous pathogenic deletion in NPHP1
76	C076	F	2	INDIAN	Long QT interval(R94.31),Bradycardia on ECG(R00.1)	Exome-Based Custom Panel	Negative	49	Negative		No, results came after discharge
77	C077	M	2	CANADIAN/ARAB	Pulmonary valve atresia(Q22.0),Ventricular septal defect (VSD)(Q21.0),MAPCA (major aortopulmonary collaterals) without PA-VSD(Q25.49)	Chromosome microarray analysis	Negative	21	Negative		No
78	C078	F	4473	EMIRATI	Acute leukemia(C95.00),Abdominal pain(R10.9),GI bleed(K92.2),Gastrointestinal hemorrhage with hematemesis(K92.0),Encephalopathy(G93.40)	Exome-Based Custom Panel	Inconclusive	73.5963	Inconclusive	2 heterozygous VUSs in PIK3CD (1339+4G>A and 1955+5C>T)	No
79	C079	F	0	INDIAN	Ambiguous genitalia(Q56.4),Respiratory distress of newborn(P22.9),Preterm infant, 1,500-1,749 grams(P07.16),Imperforate anus(Q42.3)	Chromosome microarray analysis	Inconclusive	34	Inconclusive	1 VUS deletion and 1 LP deletion in a recessive gene (carrier status).	No
80	C080	M	3	EMIRATI	Aortopulmonary window(Q21.4)	Chromosome microarray analysis	Positive	36	Positive	4q terminal deletion (16Mb).	No, results came after discharge
81	C081	M	0	LEBANESE	Term birth of infant(Z37.0),TGA (transposition of great arteries)(Q20.3),Increased ammonia level(R79.89),Neonatal sepsis(P36.9),Supraventricular tachycardia(I47.1)	Chromosome microarray analysis	Negative	47	Negative		No
82	C082	M	5	EMIRATI	Acidosis, metabolic, late neonatal(P74.0),Elevated serum creatinine(R79.89),Neonatal respiratory distress syndrome(P22.0),Preterm infant, 1,250-1,499 grams(P07.15)	Chromosome microarray analysis	Inconclusive	41.9711	Inconclusive	1 VUS duplication (266kb) at 3q26.32	No, results came after discharge
83	C083	F	13	FILIPINO	PDA (patent ductus arteriosus)(Q25.0),Anemia(D64.9),Bilateral dry eyes(H04.123),Discharge from eye(H57.8),Dysmorphism(Q89.9)	Chromosome microarray analysis	Positive	16	Positive	Trisomy 18 (Edwards Syndrome) and 2 other VUSs.	Yes		avoided further investigations	Avoided surgery	Yes	AND signed
84	C084	F	1	JORDANIAN	Single ventricle with unbalanced atrioventricular canal(Q20.4),TGA (transposition of great arteries)(Q20.3),Single ventricle with unbalanced atrioventricular canal(Q20.4),Acute respiratory distress(R06.03)	Exome-Based Custom Panel	Negative	51	Negative		No, results came after discharge
85	C085	F	15	EMIRATI	Small for gestational age, respioratory distress, CHD, large VSD pulmonary hypertension, high creatinine, abnormal swallowing, neonatal sepsis	Chromosome microarray analysis	Positive	33	Positive	16q11.2q12.2 microdeletion (8.3Mb) including the SALL1 gene asscoaited with Townes-Brocks syndrome. There are 3 other Duplication VUSs (~270-370kb on 1q24, 16p12 and Xp22). Also patient has 10% LoH.	Yes		Yes		Yes
86	C086	M	27	NIGERIAN	Hyponatremia(E87.1),Hypotonia(R29.898),Respiratory distress of newborn(P22.9)	SMN1/SMN2 Copy Number Analysis	Negative	2	Negative		No
87	C087	M	3876	EMIRATI	Systemic inflammatory response syndrome(R65.10)	Whole Exome Sequencing	Positive	66	Positive	Called Likely Positive with a heterozygous LoF in IFIH1 (Asp673fs) and a likely pathogenic variant (2148+1G>A) in MYBPC3 as a secondary finding	No, results came after discharge
88	C088	M	5055	PAKISTANI	AKI (acute kidney injury)(N17.9),Dyspnea(R06.00),H/O Kawasaki's disease(Z86.79),Hypocalcemia(E83.51),Systemic inflam response synd not due to infection w organ dysfunction(R65.11)	Whole Exome Sequencing	Negative	73.0669	Negative		No
89	C089	F	4716	EMIRATI	Chronic ITP (idiopathic thrombocytopenia)(D69.3),Active bleeding(Z78.9),Chronic ITP (idiopathic thrombocytopenia)(D69.3),Refractory	Whole Exome Sequencing	Positive	6	Positive	Positive for Fawaghi AGC-20-490with homozygous deletion for exons 2 and 3 in CD36 confirmed by PCR. Heterozygous deletion only caught in mother by CNV analysis but was not confirmed (requires ddPCR). Most likely dad is also heterozygous for the deletion who also has a frameshift in this gene which his other daughter (al Yazyah AGC-20-483) inherited. Another VUS in IKBKE was found in ALYazyah (AGC…	No
90	C090	F	0	EMIRATI	Congenital heart disease , Microcephaly, Small for gestational age	Chromosome microarray analysis	Negative	21	Negative		No
						Karyotype	Negative	10
91	C091	F	311	INDIAN	TTP (thrombotic thrombopenic purpura)	Chromosome microarray analysis	Negative	38	Inconclusive		No
						Whole Exome Sequecning	Inconclusive	50		1 path and 1 VUS (cmpd het in SLC12A3) and two VUSs in C3 and MYH9 AND ONE DE NOVO VUS IN EP300. Verbal results to Martin Bitzan on April 28, 2020. Written Report on May 5, 2020. Addendum (based on discussions with clinical team re EP300) on June 10, 2020
92	C092	M	6	EMIRATI	Dysmorphism, complex congenital heart disease, abnormal ribs	Chromosome microarray analysis	Negative	60	Negative		No
93	C093	M	0	EMIRATI	Asplenia (congenital) (Q89.01), Dysmorphism (Q89.9), Hypoplastic right ventricle (Q24.8), Hypoplastic RV (right ventricle) (Q24.8)	Whole Exome Sequecning	Negative	78	Negative		No
94	C094	F	13	EGYPTIAN	Ovotesticular disorder of sexual development (Q56.0), Renal calcinosis (E83.59), Renal calyceal dilation determined by ultrasound (N28.89), Small kidney, unilateral (N27.0)	Exome-Based Custom Panel	Positive	23	Positive	SAMD9 p.Arg1293Trp pathogenic, MIRAGE Syndrome (AD)	No
95	C095	F	918	EMIRATI	Development delay (R62.50)	Whole Exome Sequencing	Positive	57	Positive	Homozygous pathogenic EXOSC9 variant plus homozygous LoF in AGBL2 (new gene with overlapping phenotype), and carrier of other P/LP variants for recessive genes (and CFTR VUS).	No, results came after discharge
96	C096	M	77	PAKISTANI	FTT (failure to thrive) in infant (R62.51), Hirsutism (L68.0), Respiratory failure (J96.90), Tibial fracture (S82.209A)	Whole Exome Sequecning	Inconclusive	71	Inconclusive		No, results came after discharge
97	C097	M	2	COMORAN	CHD 7 gene mutation analysis for CHARGE SYNDROME (ATYPICAL) as advised by Genetic Encounter for hearing evaluation	Exome-Based Custom Panel	Positive	36	Positive	CHARGE (NM_017780.3): c.5677G>T (p.Glu1893Ter)	No, results came after discharge
98	C098	M	18	PAKISTANI	Diarrhea (R19.7), CRP elevated (R79.82), Thrombocytopenia, acquired (D69.59), Cholestasis (K83.1)	Whole Exome Sequecning	Positive	83	Positive	Homozygous nonsense variant in MYO5B	Yes	Yes
99	C099	M	3	EMIRATI	DORV with subaortic VSD (Q20.1), Cephalohematoma of newborn (P12.0), Coarctation of aorta (Q25.1), PDA (patent ductus arteriosus) (Q25.0), Term birth of infant (Z37.0)	Chromosome microarray analysis	Inconclusive	29	Inconclusive	3 VUSs	Yes				Yes
100	C100	F	0	PAKISTANI	Dysmorphic features, Micrognathia, Retrognathia, Glossoptosis, cleft palate, Hyportolerism, helix crease birth marks, low set ears	Karyotype/FISH	Positive	16	Positive	Partial deletion 9p Syndrome or Alfi’s Syndrome	Yes		Yes		Yes

## Sheet: S4-NBS Gene List
Aproved_Gene_Name	MIM_Number	Location	Disease	Inheritance
UBE3A	601623	15q11.2	Angelman syndrome, 105830 (3), Autosomal dominant	AD
MECP2	300005	Xq28	Rett syndrome, atypical, 312750 (3), X-linked dominant; Encephalopathy, neonatal severe, 300673 (3), X-linked recessive; Intellectual developmental disorder, X-linked syndromic, Lubs type, 300260 (3), X-linked recessive; {Autism susceptibility, X-linked 3}, 300496 (3), X-linked; Intellectual developmental disorder, X-linked syndromic 13, 300055 (3), X-linked recessive; Rett syndrome, 312750 (3), …	XLD_XLR_XL
GJB6	604418	13q12.11	Ectodermal dysplasia 2, Clouston type, 129500 (3), Autosomal dominant; Deafness, autosomal dominant 3B, 612643 (3), Autosomal dominant; Deafness, autosomal recessive 1B, 612645 (3), Autosomal recessive; Deafness, digenic GJB2/GJB6, 220290 (3), Autosomal recessive, Digenic dominant	AR_AD
MTTP	157147	mitochondria	Abetalipoproteinemia, 200100 (3), Autosomal recessive	AR
AAAS	605378	12q13.13	Achalasia-addisonianism-alacrimia syndrome, 231550 (3), Autosomal recessive	AR
CNGA3	600053	2q11.2	Achromatopsia 2, 216900 (3), Autosomal recessive	AR
CNGB3	605080	8q21.3	Achromatopsia 3, 262300 (3), Autosomal recessive	AR
SLC39A4	607059	8q24.3	Acrodermatitis enteropathica, 201100 (3), Autosomal recessive	AR
TRMU	610230	22q13.31	{Deafness, mitochondrial, modifier of}, 580000 (3), Mitochondrial; Liver failure, transient infantile, 613070 (3), Autosomal recessive	AR
ACOX1	609751	17q25.1	Mitchell syndrome, 618960 (3), Autosomal dominant; Peroxisomal acyl-CoA oxidase deficiency, 264470 (3), Autosomal recessive	AR_AD
EOGT	614789	3p14.1	Adams-Oliver syndrome 4, 615297 (3), Autosomal recessive	AR
ADA	608958	20q13.12	Adenosine deaminase deficiency, partial, 102700 (3), Somatic mosaicism, Autosomal recessive; Severe combined immunodeficiency due to ADA deficiency, 102700 (3), Somatic mosaicism, Autosomal recessive	AR
TBX19	604614	1q24.2	Adrenocorticotropic hormone deficiency, 201400 (3), Autosomal recessive	AR
ABCD1	300371	Xq28	Adrenoleukodystrophy, 300100 (3), X-linked recessive; Adrenomyeloneuropathy, adult, 300100 (3), X-linked recessive	XLR
BTK	300300	Xq22.1	Agammaglobulinemia, X-linked 1, 300755 (3), X-linked recessive; Isolated growth hormone deficiency, type III, with agammaglobulinemia, 307200 (3), X-linked recessive	XLR
FRMD4A	616305	10p13	?Corpus callosum, agenesis of, with facial anomalies and cerebellar ataxia, 616819 (3), Autosomal recessive	AR
RNASEH2C	610330	11q13.1	Aicardi-Goutieres syndrome 3, 610329 (3), Autosomal recessive	AR
SAMHD1	606754	20q11.23	?Chilblain lupus 2, 614415 (3), Autosomal dominant; Aicardi-Goutieres syndrome 5, 612952 (3), Autosomal recessive	AR_AD
TREX1	606609	3p21.31	Vasculopathy, retinal, with cerebral leukoencephalopathy and systemic manifestations, 192315 (3), Autosomal dominant; Aicardi-Goutieres syndrome 1, dominant and recessive, 225750 (3), Autosomal recessive, Autosomal dominant; {Systemic lupus erythematosus, susceptibility to}, 152700 (3), Autosomal dominant; Chilblain lupus, 610448 (3), Autosomal dominant	AR_AD
HGD	607474	3q13.33	Alkaptonuria, 203500 (3), Autosomal recessive	AR
SERPINA1	107400	14q32.13	Hemorrhagic diathesis due to antithrombin Pittsburgh, 613490 (3), Autosomal recessive; Emphysema due to AAT deficiency, 613490 (3), Autosomal recessive; Emphysema-cirrhosis, due to AAT deficiency, 613490 (3), Autosomal recessive	AR
MAN2B1	609458	19p13.13	Mannosidosis, alpha-, types I and II, 248500 (3), Autosomal recessive	AR
HBA1	141800	16p13.3	Hemoglobin H disease, nondeletional, 613978 (3); Thalassemias, alpha-, 604131 (3); Heinz body anemias, alpha-, 140700 (3), Autosomal dominant; Methemoglobinemia, alpha type, 617973 (3), Autosomal dominant; Erythrocytosis, familial, 7, 617981 (3), Autosomal dominant	AD
HBA2	141850	16p13.3	Heinz body anemia, 140700 (3), Autosomal dominant; Thalassemia, alpha-, 604131 (3); Erythrocytosis, familial, 7, 617981 (3), Autosomal dominant; Hemoglobin H disease, deletional and nondeletional, 613978 (3)	AD
ATRX	300032	Xq21.1	Alpha-thalassemia myelodysplasia syndrome, somatic, 300448 (3); Intellectual disability-hypotonic facies syndrome, X-linked, 309580 (3), X-linked recessive; Alpha-thalassemia/impaired intellectual development syndrome, 301040 (3), X-linked dominant	XLD_XLR
COL4A3	120070	2q36.3	Alport syndrome 3A, autosomal dominant, 104200 (3), Autosomal dominant; Hematuria, benign familial, 2, 620320 (3), Autosomal dominant; Alport syndrome 3B, autosomal recessive, 620536 (3), Autosomal recessive	AR_AD
COL4A4	120131	2q36.3	Hematuria, familial benign, 1, 141200 (3), Autosomal dominant; Alport syndrome 2, autosomal recessive, 203780 (3), Autosomal recessive	AR_AD
COL4A5	303630	Xq22.3	Alport syndrome 1, X-linked, 301050 (3), X-linked dominant	XLD
ALMS1	606844	2p13.1	Alstrom syndrome, 203800 (3), Autosomal recessive	AR
SLC12A6	604878	15q14	Agenesis of the corpus callosum with peripheral neuropathy, 218000 (3), Autosomal recessive; Charcot-Marie-Tooth disease, axonal, type 2II, 620068 (3), Autosomal dominant	AR_AD
POR	124015	7q11.23	Antley-Bixler syndrome with genital anomalies and disordered steroidogenesis, 201750 (3), Autosomal recessive; Disordered steroidogenesis due to cytochrome P450 oxidoreductase, 613571 (3)	AR
ARG1	608313	6q23.2	Argininemia, 207800 (3), Autosomal recessive	AR
ASL	608310	7q11.21	Argininosuccinic aciduria, 207900 (3), Autosomal recessive	AR
CYP19A1	107910	15q21.2	Aromatase deficiency, 613546 (3)
SLC35A3	605632	1p21.2	Arthrogryposis, impaired intellectual development, and seizures, 615553 (3), Autosomal recessive	AR
ASNS	108370	7q21.3	Asparagine synthetase deficiency, 615574 (3), Autosomal recessive	AR
AGA	613228	4q34.3	Aspartylglucosaminuria, 208400 (3), Autosomal recessive	AR
TTPA	600415	8q12.3	Ataxia with isolated vitamin E deficiency, 277460 (3), Autosomal recessive	AR
ATM	607585	11q22.3	Lymphoma, B-cell non-Hodgkin, somatic (3); Ataxia-telangiectasia, 208900 (3), Autosomal recessive; {Breast cancer, susceptibility to}, 114480 (3), Somatic mutation, Autosomal dominant; T-cell prolymphocytic leukemia, somatic (3); Lymphoma, mantle cell, somatic (3)	AR_AD
MRE11	600814	11q21	Ataxia-telangiectasia-like disorder 1, 604391 (3), Autosomal recessive	AR
SACS	604490	13q12.12	Spastic ataxia, Charlevoix-Saguenay type, 270550 (3), Autosomal recessive	AR
ARL6	608845	3q11.2	Retinitis pigmentosa 55, 613575 (3), Autosomal recessive; {Bardet-Biedl syndrome 1, modifier of}, 209900 (3), Autosomal recessive, Digenic recessive; Bardet-Biedl syndrome 3, 600151 (3), Autosomal recessive	AR
BBS1	209901	11q13.2	Bardet-Biedl syndrome 1, 209900 (3), Autosomal recessive, Digenic recessive	AR
BBS2	606151	16q13	Retinitis pigmentosa 74, 616562 (3), Autosomal recessive; Bardet-Biedl syndrome 2, 615981 (3), Autosomal recessive	AR
BBS10	610148	12q21.2	Bardet-Biedl syndrome 10, 615987 (3), Autosomal recessive	AR
BBS12	610683	4q27	Bardet-Biedl syndrome 12, 615989 (3), Autosomal recessive	AR
BBS4	600374	15q24.1	Bardet-Biedl syndrome 4, 615982 (3), Autosomal recessive	AR
CIITA	600005	16p13.13	{Rheumatoid arthritis, susceptibility to}, 180300 (3); MHC class II deficiency 1, 209920 (3), Autosomal recessive	AR
TAFAZZIN	300394	Xq28	Barth syndrome, 302060 (3), X-linked recessive
CLCNKB	602023	1p36.13	Bartter syndrome, type 3, 607364 (3), Autosomal recessive; Bartter syndrome, type 4b, digenic, 613090 (3), Digenic recessive	AR
BSND	606412	1p32.3	Sensorineural deafness with mild renal dysfunction, 602522 (3), Autosomal recessive; Bartter syndrome, type 4a, 602522 (3), Autosomal recessive	AR
GP1BA	606672	17p13.2	Bernard-Soulier syndrome, type A1 (recessive), 231200 (3), Autosomal recessive; Bernard-Soulier syndrome, type A2 (dominant), 153670 (3), Autosomal dominant; von Willebrand disease, platelet-type, 177820 (3), Autosomal dominant; {Nonarteritic anterior ischemic optic neuropathy, susceptibility to}, 258660 (3), Autosomal recessive	AR_AD
GP9	173515	3q21.3	Bernard-Soulier syndrome, type C, 231200 (3), Autosomal recessive	AR
HSD3B2	613890	1p12	Adrenal hyperplasia, congenital, due to 3-beta-hydroxysteroid dehydrogenase 2 deficiency, 201810 (3), Autosomal recessive	AR
HBB	141900	11p15.4	Methemoglobinemia, beta type, 617971 (3), Autosomal dominant; Thalassemia-beta, dominant inclusion-body, 603902 (3), Autosomal dominant; Sickle cell disease, 603903 (3), Autosomal recessive; Thalassemia, beta, 613985 (3); Delta-beta thalassemia, 141749 (3), Autosomal dominant; {Malaria, resistance to}, 611162 (3); Hereditary persistence of fetal hemoglobin, 141749 (3), Autosomal dominant; Erythro…	AR_AD
ACAT1	607809	11q22.3	Alpha-methylacetoacetic aciduria, 203750 (3), Autosomal recessive	AR
MANBA	609489	4q24	Mannosidosis, beta, 248510 (3), Autosomal recessive	AR
QDPR	612676	4p15.32	Hyperphenylalaninemia, BH4-deficient, C, 261630 (3), Autosomal recessive	AR
PCBD1	126090	10q22.1	Hyperphenylalaninemia, BH4-deficient, D, 264070 (3), Autosomal recessive	AR
ADGRG1	604110	16q21	Cortical dysplasia, complex, with other brain malformations 14B, (bilateral perisylvian), 615752 (3); Cortical dysplasia, complex, with other brain malformations 14A, (bilateral frontoparietal), 606854 (3), Autosomal recessive	AR
BTD	609019	3p25.1	Biotinidase deficiency, 253260 (3), Autosomal recessive	AR
BLM	604610	15q26.1	Bloom syndrome, 210900 (3), Autosomal recessive	AR
GDF5	601146	20q11.22	Acromesomelic dysplasia 2A, 200700 (3), Autosomal recessive; Acromesomelic dysplasia 2B, 228900 (3), Autosomal recessive; Multiple synostoses syndrome 2, 610017 (3), Autosomal dominant; Symphalangism, proximal, 1B, 615298 (3), Autosomal dominant; Brachydactyly, type A2, 112600 (3), Autosomal dominant; ?Acromesomelic dysplasia 2C, Hunter-Thompson type, 201250 (3), Autosomal recessive; Brachydactyl…	AR_AD
BCHE	177400	3q26.1	Butyrylcholinesterase deficiency, 617936 (3), Autosomal recessive; {Apnea, postanesthetic, susceptibility to, due to BCHE deficiency}, 617936 (3), Autosomal recessive	AR
ASPA	608034	17p13.2	Canavan disease, 271900 (3), Autosomal recessive	AR
CPS1	608307	2q34	Carbamoylphosphate synthetase I deficiency, 237300 (3), Autosomal recessive; {Pulmonary hypertension, neonatal, susceptibility to}, 615371 (3)	AR
SLC25A20	613698	3p21.31	Carnitine-acylcarnitine translocase deficiency, 212138 (3), Autosomal recessive	AR
CPT1A	600528	11q13.3	CPT deficiency, hepatic, type IA, 255120 (3), Autosomal recessive	AR
CPT2	600650	1p32.3	{Encephalopathy, acute, infection-induced, 4, susceptibility to}, 614212 (3), Autosomal recessive, Autosomal dominant; CPT II deficiency, infantile, 600649 (3), Autosomal recessive; CPT II deficiency, lethal neonatal, 608836 (3), Autosomal recessive; CPT II deficiency, myopathic, stress-induced, 255110 (3), Autosomal recessive, Autosomal dominant	AR_AD
RAB23	606144	6p12.1-p11.2	Carpenter syndrome, 201000 (3), Autosomal recessive	AR
RMRP	157660	9p13.3	Anauxetic dysplasia 1, 607095 (3), Autosomal recessive; Metaphyseal dysplasia without hypotrichosis, 250460 (3), Autosomal recessive; Cartilage-hair hypoplasia, 250250 (3), Autosomal recessive	AR
CASQ2	114251	1p13.1	Ventricular tachycardia, catecholaminergic polymorphic, 2, 611938 (3), Autosomal recessive	AR
CD59	107271	11p13	Hemolytic anemia, CD59-mediated, with or without immune-mediated polyneuropathy, 612300 (3), Autosomal recessive	AR
IGSF1	300137	Xq25	Hypothyroidism, central, and testicular enlargement, 300888 (3), X-linked recessive	XLR
GATM	602360	15q21.1	Cerebral creatine deficiency syndrome 3, 612718 (3), Autosomal recessive; Fanconi renotubular syndrome 1, 134600 (3), Autosomal dominant	AR_AD
SLC6A8	300036	Xq28	Cerebral creatine deficiency syndrome 1, 300352 (3), X-linked recessive	XLR
GAMT	601240	19p13.3	Cerebral creatine deficiency syndrome 2, 612736 (3), Autosomal recessive	AR
SNAP29	604202	22q11.21	Cerebral dysgenesis, neuropathy, ichthyosis, and palmoplantar keratoderma syndrome, 609528 (3), Autosomal recessive	AR
CYP27A1	606530	2q35	Cerebrotendinous xanthomatosis, 213700 (3), Autosomal recessive	AR
NDRG1	605262	8q24.22	Charcot-Marie-Tooth disease, type 4D, 601455 (3), Autosomal recessive	AR
PRPS1	311850	Xq22.3	Arts syndrome, 301835 (3), X-linked recessive; Phosphoribosylpyrophosphate synthetase superactivity, 300661 (3), X-linked recessive; Charcot-Marie-Tooth disease, X-linked recessive, 5, 311070 (3), X-linked recessive; Deafness, X-linked 1, 304500 (3), X-linked; Gout, PRPS-related, 300661 (3), X-linked recessive	XLD_XLR_XL
GJB1	304040	Xq13.1	Charcot-Marie-Tooth neuropathy, X-linked dominant, 1, 302800 (3), X-linked dominant	XLD
LYST	606897	1q42.3	Chediak-Higashi syndrome, 214500 (3), Autosomal recessive	AR
ARSL	300180	Xp22.33	Chondrodysplasia punctata, X-linked recessive, 302950 (3), X-linked recessive	XLR
VPS13A	605978	9q21.2	Choreoacanthocytosis, 200150 (3), Autosomal recessive	AR
CHM	300390	Xq21.2	Choroideremia, 303100 (3), X-linked	XL
CYBA	608508	16q24.2	Chronic granulomatous disease 4, autosomal recessive, 233690 (3), Autosomal recessive	AR
CYBB	300481	Xp21.1-p11.4	Immunodeficiency 34, mycobacteriosis, X-linked, 300645 (3), X-linked recessive; Chronic granulomatous disease, X-linked, 306400 (3), X-linked recessive	XLR
SLC25A13	603859	7q21.3	Citrullinemia, type II, neonatal-onset, 605814 (3), Autosomal recessive; Citrullinemia, adult-onset type II, 603471 (3), Autosomal recessive	AR
ASS1	603470	9q34.11	Citrullinemia, 215700 (3), Autosomal recessive	AR
ERCC8	609412	5q12.1	UV-sensitive syndrome 2, 614621 (3), Autosomal recessive; Cockayne syndrome, type A, 216400 (3), Autosomal recessive	AR
ERCC6	609413	10q11.23	UV-sensitive syndrome 1, 600630 (3), Autosomal recessive; Cerebrooculofacioskeletal syndrome 1, 214150 (3), Autosomal recessive; ?De Sanctis-Cacchione syndrome, 278800 (3), Autosomal recessive; Cockayne syndrome, type B, 133540 (3), Autosomal recessive; {Macular degeneration, age-related, susceptibility to, 5}, 613761 (3); Premature ovarian failure 11, 616946 (3), Autosomal dominant; {Lung cancer…	AR_AD
VPS13B	607817	8q22.2	Cohen syndrome, 216550 (3), Autosomal recessive	AR
LMAN1	601567	18q21.32	Combined factor V and VIII deficiency, 227300 (3), Autosomal recessive	AR
ACSF3	614245	16q24.3	Combined malonic and methylmalonic aciduria, 614265 (3), Autosomal recessive	AR
GFM1	606639	3q25.32	Combined oxidative phosphorylation deficiency 1, 609060 (3), Autosomal recessive	AR
TSFM	604723	12q14.1	Combined oxidative phosphorylation deficiency 3, 610505 (3), Autosomal recessive	AR
POU1F1	173110	3p11.2	Pituitary hormone deficiency, combined or isolated, 1, 613038 (3), Autosomal recessive, Autosomal dominant	AR_AD
PROP1	601538	5q35.3	Pituitary hormone deficiency, combined, 2, 262600 (3), Autosomal recessive	AR
LHX3	600577	9q34.3	Pituitary hormone deficiency, combined, 3, 221750 (3), Autosomal recessive	AR
PSAP	176801	10q22.1	Combined SAP deficiency, 611721 (3), Autosomal recessive; Krabbe disease, atypical, 611722 (3), Autosomal recessive; Metachromatic leukodystrophy due to SAP-b deficiency, 249900 (3), Autosomal recessive; Gaucher disease, atypical, 610539 (3); {Parkinson disease 24, autosomal dominant, susceptibility to}, 619491 (3), Autosomal dominant	AR_AD
GUCY2D	600179	17p13.1	Cone-rod dystrophy 6, 601777 (3), Autosomal recessive, Autosomal dominant; ?Choroidal dystrophy, central areolar 1, 215500 (3), Autosomal dominant; Leber congenital amaurosis 1, 204000 (3), Autosomal recessive; Night blindness, congenital stationary, type 1I, 618555 (3), Autosomal recessive	AR_AD
CYP11B1	610613	8q24.3	Aldosteronism, glucocorticoid-remediable, 103900 (3), Autosomal dominant; Adrenal hyperplasia, congenital, due to 11-beta-hydroxylase deficiency, 202010 (3), Autosomal recessive	AR_AD
CYP17A1	609300	10q24.32	17,20-lyase deficiency, isolated, 202110 (3), Autosomal recessive; 17-alpha-hydroxylase/17,20-lyase deficiency, 202110 (3), Autosomal recessive	AR
CYP21A2	613815	6p21.33	Hyperandrogenism, nonclassic type, due to 21-hydroxylase deficiency, 201910 (3), Autosomal recessive; Adrenal hyperplasia, congenital, due to 21-hydroxylase deficiency, 201910 (3), Autosomal recessive	AR
NR0B1	300473	Xp21.2	Adrenal hypoplasia, congenital, 300200 (3), X-linked recessive; 46XY sex reversal 2, dosage-sensitive, 300018 (3), X-linked	XL_XLR
CYP11A1	118485	15q24.1	Adrenal insufficiency, congenital, with 46XY sex reversal, partial or complete, 613743 (3)
MPL	159530	1p34.2	Myelofibrosis with myeloid metaplasia, somatic, 254450 (3); Amegakaryocytic thrombocytopenia, congenital, 1, 604498 (3), Autosomal recessive; Thrombocythemia 2, 601977 (3), Somatic mutation, Autosomal dominant	AR_AD
AKR1D1	604741	7q33	Bile acid synthesis defect, congenital, 2, 235555 (3), Autosomal recessive	AR
HSD3B7	607764	16p11.2	Bile acid synthesis defect, congenital, 1, 607765 (3), Autosomal recessive	AR
NGLY1	610661	3p24.2	Congenital disorder of deglycosylation 1, 615273 (3), Autosomal recessive	AR
PMM2	601785	16p13.2	Congenital disorder of glycosylation, type Ia, 212065 (3), Autosomal recessive	AR
MPI	154550	15q24.1	Congenital disorder of glycosylation, type Ib, 602579 (3), Autosomal recessive	AR
ALG6	604566	1p31.3	Congenital disorder of glycosylation, type Ic, 603147 (3), Autosomal recessive	AR
DOLK	610746	9q34.11	Congenital disorder of glycosylation, type Im, 610768 (3), Autosomal recessive	AR
SEC23B	610512	20p11.23	?Cowden syndrome 7, 616858 (3), Autosomal dominant; Dyserythropoietic anemia, congenital, type II, 224100 (3), Autosomal recessive	AR_AD
CDAN1	607465	15q15.2	Dyserythropoietic anemia, congenital, type Ia, 224120 (3), Autosomal recessive	AR
ABCA12	607800	2q35	Ichthyosis, congenital, autosomal recessive 4B (harlequin), 242500 (3), Autosomal recessive; Ichthyosis, congenital, autosomal recessive 4A, 601277 (3), Autosomal recessive	AR
NTRK1	191315	1q23.1	Insensitivity to pain, congenital, with anhidrosis, 256800 (3), Autosomal recessive	AR
LAMA2	156225	6q22.33	Muscular dystrophy, limb-girdle, autosomal recessive 23, 618138 (3), Autosomal recessive; Muscular dystrophy, congenital, merosin deficient or partially deficient, 607855 (3), Autosomal recessive	AR
CHAT	118490	10q11.23	Myasthenic syndrome, congenital, 6, presynaptic, 254210 (3), Autosomal recessive	AR
CHRNE	100725	17p13.2	Myasthenic syndrome, congenital, 4A, slow-channel, 605809 (3), Autosomal recessive, Autosomal dominant; Myasthenic syndrome, congenital, 4C, associated with acetylcholine receptor deficiency, 608931 (3), Autosomal recessive; Myasthenic syndrome, congenital, 4B, fast-channel, 616324 (3), Autosomal recessive	AR_AD
DOK7	610285	4p16.3	Fetal akinesia deformation sequence 3, 618389 (3), Autosomal recessive; Myasthenic syndrome, congenital, 10, 254300 (3), Autosomal recessive	AR
RAPSN	601592	11p11.2	Fetal akinesia deformation sequence 2, 618388 (3), Autosomal recessive; Myasthenic syndrome, congenital, 11, associated with acetylcholine receptor deficiency, 616326 (3), Autosomal recessive	AR
HAX1	605998	1q21.3	Neutropenia, severe congenital 3, autosomal recessive, 610738 (3), Autosomal recessive	AR
VPS45	610035	1q21.2	Neutropenia, severe congenital, 5, autosomal recessive, 615285 (3), Autosomal recessive	AR
TSHR	603372	14q24-q31	Hyperthyroidism, familial gestational, 603373 (3), Autosomal dominant; Hyperthyroidism, nonautoimmune, 609152 (3), Autosomal dominant; Thyroid adenoma, hyperfunctioning, somatic, 609152 (3); Hypothyroidism, congenital, nongoitrous, 1, 275200 (3), Autosomal recessive; Thyroid carcinoma with thyrotoxicosis, somatic, 609152 (3)	AR_AD
TSHB	188540	1p13.2	Hypothyroidism, congenital, nongoitrous 4, 275100 (3), Autosomal recessive	AR
SLC26A3	126650	7q22.3-q31.1	Diarrhea 1, secretory chloride, congenital, 214700 (3), Autosomal recessive	AR
SLC4A11	610206	20p13	Corneal endothelial dystrophy, autosomal recessive, 217700 (3), Autosomal recessive; Corneal dystrophy, Fuchs endothelial, 4, 613268 (3); Corneal endothelial dystrophy and perceptive deafness, 217400 (3), Autosomal recessive	AR
CYP11B2	124080	8q24.3	Hypoaldosteronism, congenital, due to CMO I deficiency, 203400 (3), Autosomal recessive; Aldosterone to renin ratio raised (3); {Low renin hypertension, susceptibility to} (3); Hypoaldosteronism, congenital, due to CMO II deficiency, 610600 (3), Autosomal recessive	AR
UGT1A1	191740	2q37.1	Crigler-Najjar syndrome, type I, 218800 (3), Autosomal recessive; [Bilirubin, serum level of, QTL1], 601816 (3); Hyperbilirubinemia, familial transient neonatal, 237900 (3), Autosomal recessive, Autosomal dominant; Crigler-Najjar syndrome, type II, 606785 (3), Autosomal recessive; [Gilbert syndrome], 143500 (3), Autosomal recessive	AR_AD
CFTR	602421	7q31.2	Cystic fibrosis, 219700 (3), Autosomal recessive; Sweat chloride elevation without CF (3); Congenital bilateral absence of vas deferens, 277180 (3), Autosomal recessive; {Pancreatitis, hereditary}, 167800 (3), Autosomal dominant; {Bronchiectasis with or without elevated sweat chloride 1, modifier of}, 211400 (3), Autosomal dominant; {Hypertrypsinemia, neonatal} (3)	AR_AD
CTNS	606272	17p13.2	Cystinosis, nephropathic, 219800 (3), Autosomal recessive; Cystinosis, ocular nonnephropathic, 219750 (3), Autosomal recessive; Cystinosis, late-onset juvenile or adolescent nephropathic, 219900 (3), Autosomal recessive; Cystinosis, atypical nephropathic, 219800 (3), Autosomal recessive	AR
SLC3A1	104614	2p21	Cystinuria, 220100 (3), Autosomal recessive, Autosomal dominant	AR_AD
COX15	603646	10q24.2	Mitochondrial complex IV deficiency, nuclear type 6, 615119 (3), Autosomal recessive	AR
HSD17B4	601860	5q23.1	D-bifunctional protein deficiency, 261515 (3), Autosomal recessive; Perrault syndrome 1, 233400 (3), Autosomal recessive	AR
MYO15A	602666	17p11.2	Deafness, autosomal recessive 3, 600316 (3), Autosomal recessive	AR
PJVK	610219	2q31.2	Deafness, autosomal recessive 59, 610220 (3), Autosomal recessive	AR
TMC1	606706	9q21.13	Deafness, autosomal dominant 36, 606705 (3), Autosomal dominant; Deafness, autosomal recessive 7, 600974 (3), Autosomal recessive	AR_AD
SYNE4	615535	19q13.12	Deafness, autosomal recessive 76, 615540 (3), Autosomal recessive	AR
LOXHD1	613072	18q21.1	Deafness, autosomal recessive 77, 613079 (3), Autosomal recessive	AR
TMPRSS3	605511	21q22.3	Deafness, autosomal recessive 8/10, 601072 (3), Autosomal recessive	AR
OTOF	603681	2p23.3	Auditory neuropathy, autosomal recessive, 1, 601071 (3), Autosomal recessive; Deafness, autosomal recessive 9, 601071 (3), Autosomal recessive	AR
CANT1	613165	17q25.3	Desbuquois dysplasia 1, 251450 (3), Autosomal recessive; Epiphyseal dysplasia, multiple, 7, 617719 (3), Autosomal recessive	AR
DHCR24	606418	1p32.3	Desmosterolosis, 602398 (3), Autosomal recessive	AR
BMPER	608699	7p14.3	Diaphanospondylodysostosis, 608022 (3), Autosomal recessive	AR
DPYD	612779	1p21.3	Dihydropyrimidine dehydrogenase deficiency, 274270 (3), Autosomal recessive; 5-fluorouracil toxicity, 274270 (3), Autosomal recessive	AR
SLC4A1	109270	17q21.31	[Blood group, Swann], 601550 (3); [Blood group, Wright], 112050 (3); Distal renal tubular acidosis 1, 179800 (3), Autosomal dominant; [Blood group, Waldner], 112010 (3); Spherocytosis, type 4, 612653 (3), Autosomal dominant; [Blood group, Froese], 601551 (3); Distal renal tubular acidosis 4 with hemolytic anemia, 611590 (3), Autosomal recessive; {Malaria, resistance to}, 611162 (3); Cryohydrocyto…	AR_AD
DMD	300377	Xp21.2-p21.1	Becker muscular dystrophy, 300376 (3), X-linked recessive; Cardiomyopathy, dilated, 3B, 302045 (3), X-linked; Duchenne muscular dystrophy, 310200 (3), X-linked recessive	XLD_XLD_XL
RTEL1	608833	20q13.33	Dyskeratosis congenita, autosomal dominant 4, 615190 (3), Autosomal recessive, Autosomal dominant; Dyskeratosis congenita, autosomal recessive 5, 615190 (3), Autosomal recessive, Autosomal dominant; Pulmonary fibrosis and/or bone marrow failure syndrome, telomere-related, 3, 616373 (3), Autosomal dominant	AR_AD
DKC1	300126	Xq28	?Cataracts, hearing impairment, nephrotic syndrome, and enterocolitis 1, 301108 (3), X-linked dominant; Dyskeratosis congenita, X-linked, 305000 (3), X-linked recessive	XLD_XLR
COL7A1	120120	3p21.31	Nail disorder, nonsyndromic congenital, 8, 607523 (3), Autosomal dominant; Epidermolysis bullosa dystrophica, Bart type, 132000 (3), Autosomal dominant; Epidermolysis bullosa dystrophica inversa, 226600 (3), Autosomal recessive; Epidermolysis bullosa dystrophica, autosomal recessive, 226600 (3), Autosomal recessive; Epidermolysis bullosa, pretibial, 131850 (3), Autosomal recessive, Autosomal domi…	AR_AD
PLOD1	153454	1p36.22	Ehlers-Danlos syndrome, kyphoscoliotic type, 1, 225400 (3), Autosomal recessive	AR
ADAMTS2	604539	5q35.3	Ehlers-Danlos syndrome, dermatosparaxis type, 225410 (3), Autosomal recessive	AR
EVC2	607261	4p16.2	Ellis-van Creveld syndrome, 225500 (3), Autosomal recessive; Weyers acrofacial dysostosis, 193530 (3), Autosomal dominant	AR_AD
EVC	604831	4p16.2	Ellis-van Creveld syndrome, 225500 (3), Autosomal recessive; ?Weyers acrofacial dysostosis, 193530 (3), Autosomal dominant	AR_AD
EMD	300384	Xq28	Emery-Dreifuss muscular dystrophy 1, X-linked, 310300 (3), X-linked recessive	XLR
NR2E3	604485	15q23	Retinitis pigmentosa 37, 611131 (3), Autosomal recessive, Autosomal dominant; Enhanced S-cone syndrome, 268100 (3), Autosomal recessive	AR_AD
ETHE1	608451	19q13.31	Ethylmalonic encephalopathy, 602473 (3), Autosomal recessive	AR
GLA	300644	Xq22.1	Fabry disease, cardiac variant, 301500 (3), X-linked; Fabry disease, 301500 (3), X-linked	XL
F9	300746	Xq27.1	{Deep venous thrombosis, protection against}, 300807 (3), X-linked recessive; Hemophilia B, 306900 (3), X-linked recessive; Thrombophilia 8, X-linked, due to factor IX defect, 300807 (3), X-linked recessive; {Warfarin sensitivity}, 301052 (3), X-linked	XLR_XL
F5	612309	1q24.2	Thrombophilia 2 due to activated protein C resistance, 188055 (3), Autosomal dominant; {Pregnancy loss, recurrent, susceptibility to, 1}, 614389 (3), Autosomal dominant; {Thrombophilia, susceptibility to, due to factor V Leiden}, 188055 (3), Autosomal dominant; {Budd-Chiari syndrome}, 600880 (3), Autosomal recessive; {Stroke, ischemic, susceptibility to}, 601367 (3), Multifactorial; Factor V defi…	AR_AD
F7	613878	13q34	{Myocardial infarction, decreased susceptibility to}, 608446 (3); Factor VII deficiency, 227500 (3), Autosomal recessive	AR
F11	264900	4q35.2	Factor XI deficiency, autosomal dominant, 612416 (3); Factor XI deficiency, autosomal recessive, 612416 (3)	AR_AD
LDLRAP1	605747	1p36.11	Hypercholesterolemia, familial, 4, 603813 (3), Autosomal recessive	AR
ELP1	603722	9q31.3	{Medulloblastoma}, 155255 (3), Autosomal recessive, Somatic mutation, Autosomal dominant; Dysautonomia, familial, 223900 (3), Autosomal recessive	AR_AD
LDLR	606945	19p13.2	LDL cholesterol level QTL2, 143890 (3), Autosomal recessive, Autosomal dominant; Hypercholesterolemia, familial, 1, 143890 (3), Autosomal recessive, Autosomal dominant	AR_AD
HADH	601609	4q25	Hyperinsulinemic hypoglycemia, familial, 4, 609975 (3), Autosomal recessive; 3-hydroxyacyl-CoA dehydrogenase deficiency, 231530 (3), Autosomal recessive	AR
ABCC8	600509	11p15.1	Diabetes mellitus, permanent neonatal 3, 618857 (3), Autosomal recessive, Autosomal dominant; Maturity-onset diabetes of the young, type 12, 621196 (3), Autosomal dominant; Diabetes mellitus, transient neonatal 2, 610374 (3), Autosomal dominant; Diabetes mellitus, noninsulin-dependent, 125853 (3), Autosomal dominant; Hypoglycemia of infancy, leucine-sensitive, 240800 (3), Autosomal dominant; Hype…	AR_AD
KCNJ11	600937	11p15.1	Diabetes, permanent neonatal 2, with or without neurologic features, 618856 (3), Autosomal dominant; Maturity-onset diabetes of the young, type 13, 616329 (3), Autosomal dominant; Diabetes mellitus, transient neonatal 3, 610582 (3), Autosomal dominant; Hyperinsulinemic hypoglycemia, familial, 2, 601820 (3), Autosomal recessive, Autosomal dominant	AR_AD
GALNT3	601756	2q24.3	Tumoral calcinosis, hyperphosphatemic, familial, 1, 211900 (3), Autosomal recessive	AR
MEFV	608107	16p13.3	Neutrophilic dermatosis, acute febrile, 608068 (3), Autosomal dominant; Familial Mediterranean fever, AR, 249100 (3), Autosomal recessive; Familial Mediterranean fever, AD, 134610 (3), Autosomal dominant	AR_AD
FANCA	607139	16q24.3	Fanconi anemia, complementation group A, 227650 (3), Autosomal recessive	AR
FANCC	613899	9q22.32	Fanconi anemia, complementation group C, 227645 (3), Autosomal recessive	AR
FANCG	602956	9p13.3	Fanconi anemia, complementation group G, 614082 (3), Autosomal recessive	AR
SLC2A2	138160	3q26.2	Fanconi-Bickel syndrome, 227810 (3), Autosomal recessive; {Diabetes mellitus, noninsulin-dependent}, 125853 (3), Autosomal dominant	AR_AD
FMR1	309550	Xq27.3	Fragile X tremor/ataxia syndrome, 300623 (3), X-linked dominant; Fragile X syndrome, 300624 (3), X-linked dominant; Premature ovarian failure 1, 311360 (3), X-linked	XLD_XL
FBP1	611570	9q22.32	Fructose-1,6-bisphosphatase deficiency, 229700 (3), Autosomal recessive	AR
FUCA1	612280	1p36.11	Fucosidosis, 230000 (3), Autosomal recessive	AR
FH	136850	1q43	Leiomyomatosis and renal cell cancer, 150800 (3), Autosomal dominant; Fumarase deficiency, 606812 (3), Autosomal recessive	AR_AD
RDH5	601617	12q13.2	Fundus albipunctatus, 136880 (3), Autosomal recessive, Autosomal dominant	AR_AD
GALK1	604313	17q25.1	Galactokinase deficiency with cataracts, 230200 (3), Autosomal recessive	AR
GALE	606953	1p36.11	Thrombocytopenia 13, syndromic, 620776 (3), Autosomal recessive; Galactose epimerase deficiency, 230350 (3), Autosomal recessive	AR
GALT	606999	9p13.3	Galactosemia, 230400 (3), Autosomal recessive	AR
CTSA	613111	20q13.12	Galactosialidosis, 256540 (3), Autosomal recessive	AR
GBA1	606463	1q22	{Lewy body dementia, susceptibility to}, 127750 (3), Autosomal dominant; Gaucher disease, type II, 230900 (3), Autosomal recessive; Gaucher disease, type IIIC, 231005 (3), Autosomal recessive; Gaucher disease, type III, 231000 (3), Autosomal recessive; Gaucher disease, type I, 230800 (3), Autosomal recessive; Gaucher disease, perinatal lethal, 608013 (3), Autosomal recessive; {Parkinson disease, …	AR_AD
TRHR	188545	8q23.1	Hypothyroidism, congenital, nongoitrous, 7, 618573 (3), Autosomal recessive	AR
GORAB	607983	1q24.2	Geroderma osteodysplasticum, 231070 (3), Autosomal recessive	AR
SLC12A3	600968	16q13	Gitelman syndrome, 263800 (3), Autosomal recessive	AR
ITGA2B	607759	17q21.31	Fetomaternal alloimmune thrombocytopenia 2, 621266 (3), Autosomal dominant; Glanzmann thrombasthenia 1, 273800 (3), Autosomal recessive; Bleeding disorder, platelet-type, 16, autosomal dominant, 187800 (3), Autosomal dominant	AR_AD
ITGB3	173470	17q21.32	Bleeding disorder, platelet-type, 24, autosomal dominant, 619271 (3), Autosomal dominant; Glanzmann thrombasthenia 2, 619267 (3), Autosomal recessive; Fetomaternal alloimmune thrombocytopenia 1, 621264 (3), Autosomal dominant	AR_AD
GCDH	608801	19p13.13	Glutaricaciduria, type I, 231670 (3), Autosomal recessive	AR
ETFA	608053	15q24.2-q24.3	Glutaric acidemia IIA, 231680 (3), Autosomal recessive	AR
ETFB	130410	19q13.41	Glutaric acidemia IIB, 231680 (3), Autosomal recessive	AR
ETFDH	231675	4q32.1	Glutaric acidemia IIC, 231680 (3), Autosomal recessive	AR
GSS	601002	20q11.22	Anemia, congenital, nonspherocytic hemolytic, 6, glutatione synthetase deficient, 231900 (3), Autosomal recessive; Glutathione synthetase deficiency, 266130 (3), Autosomal recessive	AR
PRNP	176640	20p13	Spongiform encephalopathy with neuropsychiatric features, 606688 (3), Autosomal dominant; Gerstmann-Straussler disease, 137440 (3), Autosomal dominant; Huntington disease-like 1, 603218 (3), Autosomal dominant; Insomnia, fatal familial, 600072 (3), Autosomal dominant; {Kuru, susceptibility to}, 245300 (3); Cerebral amyloid angiopathy, PRNP-related, 137440 (3), Autosomal dominant; Creutzfeldt-Jako…	AD
AMT	238310	3p21.31	Glycine encephalopathy 2, 620398 (3), Autosomal recessive	AR
GLDC	238300	9p24.1	Glycine encephalopathy1, 605899 (3), Autosomal recessive	AR
GYS2	138571	12p12.1	Glycogen storage disease 0, liver, 240600 (3), Autosomal recessive	AR
G6PC1	613742	17q21.31	Glycogen storage disease Ia, 232200 (3), Autosomal recessive	AR
SLC37A4	602671	11q23.3	Glycogen storage disease Ib, 232220 (3), Autosomal recessive; Congenital disorder of glycosylation, type IIw, 619525 (3), Autosomal dominant; Glycogen storage disease Ic, 232240 (3), Autosomal recessive	AR_AD
GAA	606800	17q25.3	Glycogen storage disease II, 232300 (3), Autosomal recessive	AR
AGL	610860	1p21.2	Glycogen storage disease IIIa, 232400 (3), Autosomal recessive; Glycogen storage disease IIIb, 232400 (3), Autosomal recessive	AR
GBE1	607839	3p12.2	Glycogen storage disease IV, 232500 (3), Autosomal recessive; Polyglucosan body disease, adult form, 263570 (3), Autosomal recessive	AR
PHKB	172490	16q12.1	Phosphorylase kinase deficiency of liver and muscle, autosomal recessive, 261750 (3), Autosomal recessive	AR
PYGM	608455	11q13.1	McArdle disease, 232600 (3), Autosomal recessive	AR
PYGL	613741	14q22.1	Glycogen storage disease VI, 232700 (3), Autosomal recessive	AR
PFKM	610681	12q13.11	Glycogen storage disease VII, 232800 (3), Autosomal recessive	AR
BCS1L	603647	2q35	GRACILE syndrome, 603358 (3), Autosomal recessive; Mitochondrial complex III deficiency, nuclear type 1, 124000 (3), Autosomal recessive; Bjornstad syndrome, 262000 (3), Autosomal recessive	AR
NBEAL2	614169	3p21.31	Gray platelet syndrome, 139090 (3), Autosomal recessive	AR
GHRHR	139191	7p14.3	Growth hormone deficiency, isolated, type IV, 618157 (3), Autosomal recessive	AR
HFE	613609	6p22.2	Hemochromatosis, type 1, 235200 (3), Autosomal recessive	AR
HJV	608374	1q21.1	Hemochromatosis, type 2A, 602390 (3), Autosomal recessive	AR
TFR2	604720	7q22.1	Hemochromatosis, type 3, 604250 (3), Autosomal recessive	AR
G6PD	305900	Xq28	Anemia, congenital, nonspherocytic hemolytic, 1, G6PD deficient, 300908 (3), X-linked; {Resistance to malaria due to G6PD deficiency}, 611162 (3)	XL
ALDOB	612724	9q31.1	Fructose intolerance, hereditary, 229600 (3), Autosomal recessive	AR
TECPR2	615000	14q32.33	Neuropathy, hereditary sensory and autonomic, type IX, with developmental delay, 615031 (3), Autosomal recessive	AR
HPS1	604982	10q24.2	Hermansky-Pudlak syndrome 1, 203300 (3), Autosomal recessive	AR
HPS3	606118	3q24	Hermansky-Pudlak syndrome 3, 614072 (3), Autosomal recessive	AR
HPS4	606682	22q12.1	Hermansky-Pudlak syndrome 4, 614073 (3), Autosomal recessive	AR
HPS6	607522	10q24.32	Hermansky-Pudlak syndrome 6, 614075 (3), Autosomal recessive	AR
HMGCL	613898	1p36.11	HMG-CoA lyase deficiency, 246450 (3), Autosomal recessive	AR
HMGCS2	600234	1p12	HMG-CoA synthase-2 deficiency, 605911 (3), Autosomal recessive	AR
HLCS	609018	21q22.13	Holocarboxylase synthetase deficiency, 253270 (3), Autosomal recessive	AR
CBS	613381	21q22.3	Thrombosis, hyperhomocysteinemic, 236200 (3), Autosomal recessive; Homocystinuria, B6-responsive and nonresponsive types, 236200 (3), Autosomal recessive	AR
MTHFR	607093	1p36.22	{Vascular disease, susceptibility to} (3); Homocystinuria due to MTHFR deficiency, 236250 (3), Autosomal recessive; {Thromboembolism, susceptibility to}, 188050 (3), Autosomal dominant; {Schizophrenia, susceptibility to}, 181500 (3), Autosomal dominant; {Neural tube defects, susceptibility to}, 601634 (3), Autosomal recessive	AR_AD
MTRR	602568	5p15.31	Homocystinuria-megaloblastic anemia, cbl E type, 236270 (3), Autosomal recessive; {Neural tube defects, folate-sensitive, susceptibility to}, 601634 (3), Autosomal recessive	AR
MTR	156570	1q43	{Neural tube defects, folate-sensitive, susceptibility to}, 601634 (3), Autosomal recessive; Homocystinuria-megaloblastic anemia, cblG complementation type, 250940 (3), Autosomal recessive	AR
L1CAM	308840	Xq28	MASA syndrome, 303350 (3), X-linked recessive; Hydrocephalus, congenital, X-linked, 307000 (3), X-linked recessive; ?Corpus callosum, partial agenesis of, 304100 (3), X-linked recessive	XLR
HYLS1	610693	11q24.2	Hydrolethalus syndrome, 236680 (3), Autosomal recessive	AR
CD40LG	300386	Xq26.3	Immunodeficiency, X-linked, with hyper-IgM, 308230 (3), X-linked recessive	XLR
SLC25A15	603861	13q14.11	Hyperornithinemia-hyperammonemia-homocitrullinemia syndrome, 238970 (3), Autosomal recessive	AR
SARS2	612804	19q13.2	Hyperuricemia, pulmonary hypertension, renal failure, and alkalosis, 613845 (3), Autosomal recessive	AR
EDA	300451	Xq13.1	Tooth agenesis, selective, X-linked 1, 313500 (3), X-linked dominant; Ectodermal dysplasia 1, hypohidrotic, X-linked, 305100 (3), X-linked recessive	XLD_XLR
TRPM6	607009	9q21.13	Hypomagnesemia 1, intestinal, 602014 (3), Autosomal recessive	AR
AIMP1	603605	4q24	Leukodystrophy, hypomyelinating, 3, 260600 (3), Autosomal recessive	AR
VPS11	608549	11q23.3	?Dystonia 32, 619637 (3), Autosomal recessive; Leukodystrophy, hypomyelinating, 12, 616683 (3), Autosomal recessive	AR
TBCE	604934	1q42.3	Kenny-Caffey syndrome, type 1, 244460 (3), Autosomal recessive; Hypoparathyroidism-retardation-dysmorphism syndrome, 241410 (3), Autosomal recessive; Encephalopathy, progressive, with amyotrophy and optic atrophy, 617207 (3), Autosomal recessive	AR
ALPL	171760	1p36.12	Odontohypophosphatasia, 146300 (3), Autosomal recessive, Autosomal dominant; Hypophosphatasia, infantile, 241500 (3), Autosomal recessive; Hypophosphatasia, childhood, 241510 (3), Autosomal recessive; Hypophosphatasia, adult, 146300 (3), Autosomal recessive, Autosomal dominant	AR_AD
SLC34A3	609826	9q34.3	Hypophosphatemic rickets with hypercalciuria, 241530 (3), Autosomal recessive	AR
LPAR6	609239	13q14.2	Hypotrichosis 8, 278150 (3), Autosomal recessive; Woolly hair, autosomal recessive 1, with or without hypotrichosis, 278150 (3), Autosomal recessive	AR
CD3E	186830	11q23.3	Immunodeficiency 18, 615615 (3), Autosomal recessive; Immunodeficiency 18, SCID variant, 615615 (3), Autosomal recessive	AR
CD3D	186790	11q23.3	Immunodeficiency 19, severe combined, 615617 (3), Autosomal recessive	AR
GNE	603824	9p13.3	Sialuria, 269921 (3), Autosomal dominant; Thrombocytopenia 12 with or without myopathy, 620757 (3), Autosomal recessive; Nonaka myopathy, 605820 (3), Autosomal recessive	AR_AD
MED17	603810	11q21	Microcephaly, postnatal progressive, with seizures and brain atrophy, 613668 (3), Autosomal recessive	AR
PLA2G6	603604	22q13.1	Parkinson disease 14, autosomal recessive, 612953 (3), Autosomal recessive; Neurodegeneration with brain iron accumulation 2B, 610217 (3), Autosomal recessive; Infantile neuroaxonal dystrophy 1, 256600 (3), Autosomal recessive	AR
ATP8B1	602397	18q21.31	Cholestasis, progressive familial intrahepatic 1, 211600 (3), Autosomal recessive; Cholestasis, intrahepatic, of pregnancy, 1, 147480 (3), Autosomal dominant; Cholestasis, benign recurrent intrahepatic, 243300 (3), Autosomal recessive	AR_AD
IVD	607036	15q15.1	Isovaleric acidemia, 243500 (3), Autosomal recessive	AR
TMEM216	613277	11q13.1	Joubert syndrome 2, 608091 (3), Autosomal recessive; Retinitis pigmentosa 98, 620996 (3), Autosomal recessive; Meckel syndrome 2, 603194 (3), Autosomal recessive	AR
NPHP1	607100	2q13	Joubert syndrome 4, 609583 (3), Autosomal recessive; Nephronophthisis 1, juvenile, 256100 (3), Autosomal recessive; Senior-Loken syndrome-1, 266900 (3), Autosomal recessive	AR
RPGRIP1L	610937	16q12.2	Joubert syndrome 7, 611560 (3), Autosomal recessive; Meckel syndrome 5, 611561 (3), Autosomal recessive; ?COACH syndrome 3, 619113 (3), Autosomal recessive	AR
COL17A1	113811	10q25.1	Epithelial recurrent erosion dystrophy, 122400 (3), Autosomal dominant; Epidermolysis bullosa, junctional 4, intermediate, 619787 (3), Autosomal recessive	AR_AD
ITGA6	147556	2q31.1	Epidermolysis bullosa, junctional 6, with pyloric atresia, 619817 (3), Autosomal recessive	AR
ITGB4	147557	17q25.1	Epidermolysis bullosa, junctional 5B, with pyloric atresia, 226730 (3), Autosomal recessive; Epidermolysis bullosa, junctional 5A, intermediate, 619816 (3), Autosomal recessive	AR
LAMA3	600805	18q11.2	Epidermolysis bullosa, junctional 2A, intermediate, 619783 (3), Autosomal recessive; Epidermolysis bullosa, junctional 2C, laryngoonychocutaneous, 245660 (3), Autosomal recessive; Epidermolysis bullosa, junctional 2B, severe, 619784 (3), Autosomal recessive	AR
LAMB3	150310	1q32.2	Epidermolysis bullosa, junctional 1B, severe, 226700 (3), Autosomal recessive; Epidermolysis bullosa, junctional 1A, intermediate, 226650 (3), Autosomal recessive; Amelogenesis imperfecta, type IA, 104530 (3), Autosomal dominant	AR_AD
LAMC2	150292	1q25.3	Epidermolysis bullosa, junctional 3B, severe, 619786 (3), Autosomal recessive; Epidermolysis bullosa, junctional 3A, intermediate, 619785 (3), Autosomal recessive	AR
ROGDI	614574	16p13.3	Kohlschutter-Tonz syndrome, 226750 (3), Autosomal recessive	AR
GALC	606890	14q31.3	Krabbe disease, 245200 (3), Autosomal recessive	AR
TGM1	190195	14q12	Ichthyosis, congenital, autosomal recessive 1, 242300 (3), Autosomal recessive	AR
GHR	600946	5p13.1-p12	Laron dwarfism, 262500 (3), Autosomal recessive; Increased responsiveness to growth hormone, 604271 (3), Autosomal dominant; Growth hormone insensitivity, partial, 604271 (3), Autosomal dominant; {Hypercholesterolemia, familial, modifier of}, 143890 (3), Autosomal recessive, Autosomal dominant	AR_AD
CEP290	610142	12q21.32	Leber congenital amaurosis 10, 611755 (3); Joubert syndrome 5, 610188 (3), Autosomal recessive; Senior-Loken syndrome 6, 610189 (3), Autosomal recessive; ?Bardet-Biedl syndrome 14, 615991 (3), Autosomal recessive; Meckel syndrome 4, 611134 (3), Autosomal recessive	AR
RDH12	608830	14q24.1	Leber congenital amaurosis 13, 612712 (3), Autosomal recessive, Autosomal dominant	AR_AD
TULP1	602280	6p21.31	Leber congenital amaurosis 15, 613843 (3), Autosomal recessive; Retinitis pigmentosa 14, 600132 (3), Autosomal recessive	AR
RPE65	180069	1p31.3	Retinitis pigmentosa 20, 613794 (3), Autosomal recessive; Retinitis pigmentosa 87 with choroidal involvement, 618697 (3), Autosomal dominant; Leber congenital amaurosis 2, 204100 (3), Autosomal recessive	AR_AD
AIPL1	604392	17p13.2	Leber congenital amaurosis 4, 604393 (3), Autosomal recessive, Autosomal dominant; Retinitis pigmentosa, juvenile, 604393 (3), Autosomal recessive, Autosomal dominant; Cone-rod dystrophy, 604393 (3), Autosomal recessive, Autosomal dominant	AR_AD
LCA5	611408	6q14.1	Leber congenital amaurosis 5, 604537 (3), Autosomal recessive	AR
CRB1	604210	1q31.3	Leber congenital amaurosis 8, 613835 (3), Autosomal recessive; Retinitis pigmentosa-12, 600105 (3), Autosomal recessive; Pigmented paravenous chorioretinal atrophy, 172870 (3), Autosomal dominant	AR_AD
NDUFS7	601825	19p13.3	Mitochondrial complex I deficiency, nuclear type 3, 618224 (3), Autosomal recessive	AR
SURF1	185620	9q34.2	Charcot-Marie-Tooth disease, type 4K, 616684 (3), Autosomal recessive; Mitochondrial complex IV deficiency, nuclear type 1, 220110 (3), Autosomal recessive	AR
LRPPRC	607544	2p21	Mitochondrial complex IV deficiency, nuclear type 5, (French-Canadian), 220111 (3), Autosomal recessive	AR
GLE1	603371	9q34.11	Lethal congenital contracture syndrome 1, 253310 (3), Autosomal recessive; Congenital arthrogryposis with anterior horn cell disease, 611890 (3), Autosomal recessive	AR
ERBB3	190151	12q13.2	?Lethal congenital contractural syndrome 2, 607598 (3), Autosomal recessive; {?Erythroleukemia, familial, susceptibility to}, 133180 (3), Autosomal dominant; Visceral neuropathy, familial, 1, autosomal recessive, 243180 (3), Autosomal recessive	AR_AD
PIP5K1C	606102	19p13.3	Lethal congenital contractural syndrome 3, 611369 (3), Autosomal recessive	AR
EIF2B5	603945	3q27.1	Leukoencephalopathy with vanishing white matter 5, with or without ovarian failure, 620315 (3), Autosomal recessive	AR
CAPN3	114240	15q15.1	Muscular dystrophy, limb-girdle, autosomal recessive 1, 253600 (3), Autosomal recessive; Muscular dystrophy, limb-girdle, autosomal dominant 4, 618129 (3), Autosomal dominant	AR_AD
DYSF	603009	2p13.2	Muscular dystrophy, limb-girdle, autosomal recessive 2, 253601 (3), Autosomal recessive; Miyoshi muscular dystrophy 1, 254130 (3), Autosomal recessive; Myopathy, distal, with anterior tibial onset, 606768 (3), Autosomal recessive	AR
SGCG	608896	13q12.12	Muscular dystrophy, limb-girdle, autosomal recessive 5, 253700 (3), Autosomal recessive	AR
SGCA	600119	17q21.33	Muscular dystrophy, limb-girdle, autosomal recessive 3, 608099 (3), Autosomal recessive	AR
SGCB	600900	4q12	Muscular dystrophy, limb-girdle, autosomal recessive 4, 604286 (3), Autosomal recessive	AR
SGCD	601411	5q33.2-q33.3	Cardiomyopathy, dilated, 1L, 606685 (3); Muscular dystrophy, limb-girdle, autosomal recessive 6, 601287 (3), Autosomal recessive	AR
TRIM32	602290	9q33.1	?Bardet-Biedl syndrome 11, 615988 (3), Autosomal recessive; Muscular dystrophy, limb-girdle, autosomal recessive 8, 254110 (3), Autosomal recessive	AR
FKRP	606596	19q13.32	Muscular dystrophy-dystroglycanopathy (congenital with or without impaired intellectual development), type B, 5, 606612 (3), Autosomal recessive; Muscular dystrophy-dystroglycanopathy (limb-girdle), type C, 5, 607155 (3), Autosomal recessive; Muscular dystrophy-dystroglycanopathy (congenital with brain and eye anomalies), type A, 5, 613153 (3), Autosomal recessive	AR
ANO5	608662	11p14.3	Muscular dystrophy, limb-girdle, autosomal recessive 12, 611307 (3), Autosomal recessive; Miyoshi muscular dystrophy 3, 613319 (3), Autosomal recessive; Gnathodiaphyseal dysplasia, 166260 (3), Autosomal dominant	AR_AD
DLD	238331	7q31.1	Dihydrolipoamide dehydrogenase deficiency, 246900 (3), Autosomal recessive	AR
STAR	600617	8p11.23	Lipoid adrenal hyperplasia, 201710 (3), Autosomal recessive	AR
LPL	609708	8p21.3	Lipoprotein lipase deficiency, 238600 (3), Autosomal recessive; [High density lipoprotein cholesterol level QTL 11], 238600 (3), Autosomal recessive; Combined hyperlipidemia, familial, 144250 (3), Autosomal dominant	AR_AD
HADHA	600890	2p23.3	HELLP syndrome, maternal, of pregnancy, 609016 (3), Autosomal recessive; LCHAD deficiency, 609016 (3), Autosomal recessive; Mitochondrial trifunctional protein deficiency 1, 609015 (3), Autosomal recessive; Fatty liver, acute, of pregnancy, 609016 (3), Autosomal recessive	AR
OCRL	300535	Xq26.1	Dent disease 2, 300555 (3), X-linked recessive; Lowe syndrome, 309000 (3), X-linked recessive	XLR
SLC7A7	603593	14q11.2	Lysinuric protein intolerance, 222700 (3), Autosomal recessive	AR
LHCGR	152790	2p16.3	Leydig cell adenoma, somatic, with precocious puberty, 176410 (3); Leydig cell hypoplasia with pseudohermaphroditism, 238320 (3), Autosomal recessive; Leydig cell hypoplasia with hypergonadotropic hypogonadism, 238320 (3), Autosomal recessive; Luteinizing hormone resistance, female, 238320 (3), Autosomal recessive; Precocious puberty, male, 176410 (3), Autosomal dominant	AR_AD
HSD17B3	605573	9q22.32	Pseudohermaphroditism, male, with gynecomastia, 264300 (3), Autosomal recessive	AR
RYR1	180901	19q13.2	Congenital myopathy 1B, autosomal recessive, 255320 (3), Autosomal recessive; Congenital myopathy 1A, autosomal dominant, with susceptibility to malignant hyperthermia, 117000 (3), Autosomal dominant; King-Denborough syndrome, 619542 (3), Autosomal dominant; {Malignant hyperthermia susceptibility 1}, 145600 (3), Autosomal dominant	AR_AD
MLYCD	606761	16q23.3	Malonyl-CoA decarboxylase deficiency, 248360 (3), Autosomal recessive	AR
BCKDHA	608348	19q13.2	Maple syrup urine disease, type Ia, 248600 (3), Autosomal recessive	AR
BCKDHB	248611	6q14.1	Maple syrup urine disease, type Ib, 620698 (3), Autosomal recessive	AR
DBT	248610	1p21.2	Maple syrup urine disease, type II, 620699 (3), Autosomal recessive	AR
MKS1	609883	17q22	Bardet-Biedl syndrome 13, 615990 (3), Autosomal recessive; Meckel syndrome 1, 249000 (3), Autosomal recessive; Joubert syndrome 28, 617121 (3), Autosomal recessive	AR
ACADM	607008	1p31.1	Acyl-CoA dehydrogenase, medium chain, deficiency of, 201450 (3), Autosomal recessive	AR
AP1S1	603531	7q22.1	MEDNIK syndrome, 609313 (3), Autosomal recessive	AR
MLC1	605908	22q13.33	Megalencephalic leukoencephalopathy with subcortical cysts 1, 604004 (3), Autosomal recessive	AR
AMN	605799	14q32.32	Imerslund-Grasbeck syndrome 2, 618882 (3), Autosomal recessive	AR
ATP7A	300011	Xq21.1	Occipital horn syndrome, 304150 (3), X-linked recessive; Neuronopathy, distal hereditary motor, X-linked, 300489 (3), X-linked recessive; Menkes disease, 309400 (3), X-linked recessive	XLR
CC2D1A	610055	19p13.12	Intellectual developmental disorder, autosomal recessive 3, 608443 (3), Autosomal recessive	AR
ARSA	607574	22q13.33	Metachromatic leukodystrophy, 250100 (3), Autosomal recessive	AR
MAT1A	610550	10q22.3	Hypermethioninemia, persistent, autosomal dominant, due to methionine adenosyltransferase I/III deficiency, 250850 (3), Autosomal recessive, Autosomal dominant; Methionine adenosyltransferase deficiency, autosomal recessive, 250850 (3), Autosomal recessive, Autosomal dominant	AR_AD
ACADSB	600301	10q26.13	2-methylbutyrylglycinuria, 610006 (3), Autosomal recessive	AR
MCCC1	609010	3q27.1	3-Methylcrotonyl-CoA carboxylase 1 deficiency, 210200 (3), Autosomal recessive	AR
MCCC2	609014	5q13.2	3-Methylcrotonyl-CoA carboxylase 2 deficiency, 210210 (3), Autosomal recessive	AR
OPA3	606580	19q13.32	3-methylglutaconic aciduria, type III, 258501 (3), Autosomal recessive; Optic atrophy 3 with cataract, 165300 (3), Autosomal dominant	AR_AD
MMAA	607481	4q31.21	Methylmalonic aciduria, vitamin B12-responsive, cblA type, 251100 (3), Autosomal recessive	AR
MMAB	607568	12q24.11	Methylmalonic aciduria, vitamin B12-responsive, cblB type, 251110 (3), Autosomal recessive	AR
MMUT	609058	6p12.3	Methylmalonic aciduria, mut(0) type, 251000 (3), Autosomal recessive	AR
MMACHC	609831	1p34.1	Methylmalonic aciduria and homocystinuria, cblC type, 277400 (3), Autosomal recessive	AR
MMADHC	611935	2q23.2	Methylmalonic aciduria and homocystinuria, cblD type, 277410 (3), Autosomal recessive; Methylmalonic aciduria, cblD type, 620953 (3), Autosomal recessive; Homocystinuria-megaloblastic anemia, cblD type, 620952 (3), Autosomal recessive	AR
LMBRD1	612625	6q13	Methylmalonic aciduria and homocystinuria, cblF type, 277380 (3), Autosomal recessive	AR
MCEE	608419	2p13.3	Methylmalonyl-CoA epimerase deficiency, 251120 (3), Autosomal recessive	AR
VSX2	142993	14q24.3	Microphthalmia, isolated 2, 610093 (3), Autosomal recessive; Microphthalmia/coloboma 3, 610092 (3), Autosomal recessive	AR
ACAD9	611103	3q21.3	Mitochondrial complex I deficiency, nuclear type 20, 611126 (3), Autosomal recessive	AR
NDUFA11	612638	19p13.3	Mitochondrial complex I deficiency, nuclear type 14, 618236 (3), Autosomal recessive	AR
NDUFAF5	612360	20p12.1	Mitochondrial complex I deficiency, nuclear type 16, 618238 (3), Autosomal recessive	AR
NDUFS6	603848	5p15.33	Mitochondrial complex I deficiency, nuclear type 9, 618232 (3), Autosomal recessive	AR
NDUFV1	161015	11q13.2	Mitochondrial complex I deficiency, nuclear type 4, 618225 (3), Autosomal recessive	AR
FOXRED1	613622	11q24.2	Mitochondrial complex I deficiency, nuclear type 19, 618241 (3), Autosomal recessive	AR
NDUFAF2	609653	5q12.1	Mitochondrial complex I deficiency, nuclear type 10, 618233 (3), Autosomal recessive	AR
NDUFS4	602694	5q11.2	Mitochondrial complex I deficiency, nuclear type 1, 252010 (3), Autosomal recessive	AR
COX20	614698	1q44	Mitochondrial complex IV deficiency, nuclear type 11, 619054 (3), Autosomal recessive	AR
COX6B1	124089	19q13.12	Mitochondrial complex IV deficiency, nuclear type 7, 619051 (3), Autosomal recessive	AR
COA8	616003	14q32.33	Mitochondrial complex IV deficiency, nuclear type 17, 619061 (3), Autosomal recessive	AR
PET100	614770	19p13.2	Mitochondrial complex IV deficiency, nuclear type 12, 619055 (3), Autosomal recessive	AR
SCO1	603644	17p13.1	Mitochondrial complex IV deficiency, nuclear type 4, 619048 (3), Autosomal recessive	AR
COX10	602125	17p12	Mitochondrial complex IV deficiency, nuclear type 3, 619046 (3), Autosomal recessive	AR
TK2	188250	16q21	Mitochondrial DNA depletion syndrome 2 (myopathic type), 609560 (3), Autosomal recessive; ?Progressive external ophthalmoplegia with mitochondrial DNA deletions, autosomal recessive 3, 617069 (3), Autosomal recessive	AR
DGUOK	601465	2p13.1	Portal hypertension, noncirrhotic, 1, 617068 (3), Autosomal recessive; Progressive external ophthalmoplegia with mitochondrial DNA deletions, autosomal recessive 4, 617070 (3), Autosomal recessive; Mitochondrial DNA depletion syndrome 3 (hepatocerebral type), 251880 (3), Autosomal recessive	AR
POLG	174763	15q26.1	Mitochondrial recessive ataxia syndrome (includes SANDO and SCAE), 607459 (3), Autosomal recessive; Mitochondrial DNA depletion syndrome 4B (MNGIE type), 613662 (3), Autosomal recessive; Mitochondrial DNA depletion syndrome 4A (Alpers type), 203700 (3), Autosomal recessive; Progressive external ophthalmoplegia, autosomal dominant 1, 157640 (3), Autosomal dominant; Progressive external ophthalmopl…	AR_AD
SUCLA2	603921	13q14.2	Mitochondrial DNA depletion syndrome 5 (encephalomyopathic with or without methylmalonic aciduria), 612073 (3), Autosomal recessive	AR
MPV17	137960	2p23.3	Charcot-Marie-Tooth disease, axonal, type 2EE, 618400 (3), Autosomal recessive; Mitochondrial DNA depletion syndrome 6 (hepatocerebral type), 256810 (3), Autosomal recessive	AR
PUS1	608109	12q24.33	Myopathy, lactic acidosis, and sideroblastic anemia 1, 600462 (3), Autosomal recessive	AR
HADHB	143450	2p23.3	Mitochondrial trifunctional protein deficiency 2, 620300 (3), Autosomal recessive	AR
MOCS1	603707	6p21.2	Molybdenum cofactor deficiency A, 252150 (3), Autosomal recessive	AR
GNPTAB	607840	12q23.2	Mucolipidosis III alpha/beta, 252600 (3), Autosomal recessive; Mucolipidosis II alpha/beta, 252500 (3), Autosomal recessive	AR
GNPTG	607838	16p13.3	Mucolipidosis III gamma, 252605 (3), Autosomal recessive	AR
MCOLN1	605248	19p13.2	Lisch epithelial corneal dystrophy, 620763 (3), Autosomal dominant; Mucolipidosis IV, 252650 (3), Autosomal recessive	AR_AD
IDUA	252800	4p16.3	Mucopolysaccharidosis Is, 607016 (3), Autosomal recessive; Mucopolysaccharidosis Ih/s, 607015 (3), Autosomal recessive; Mucopolysaccharidosis Ih, 607014 (3), Autosomal recessive	AR
IDS	300823	Xq28	Mucopolysaccharidosis II, 309900 (3), X-linked recessive	XLR
SGSH	605270	17q25.3	Mucopolysaccharidosis type IIIA (Sanfilippo A), 252900 (3), Autosomal recessive	AR
NAGLU	609701	17q21.2	?Charcot-Marie-Tooth disease, axonal, type 2V, 616491 (3), Autosomal dominant; Mucopolysaccharidosis type IIIB (Sanfilippo B), 252920 (3), Autosomal recessive	AR_AD
HGSNAT	610453	8p11.21-p11.1	Mucopolysaccharidosis type IIIC (Sanfilippo C), 252930 (3), Autosomal recessive; Retinitis pigmentosa 73, 616544 (3), Autosomal recessive	AR
GNS	607664	12q14.3	Mucopolysaccharidosis type IIID, 252940 (3), Autosomal recessive	AR
GALNS	612222	16q24.3	Mucopolysaccharidosis IVA, 253000 (3), Autosomal recessive	AR
GLB1	611458	3p22.3	GM1-gangliosidosis, type I, 230500 (3), Autosomal recessive; GM1-gangliosidosis, type III, 230650 (3), Autosomal recessive; Mucopolysaccharidosis type IVB (Morquio), 253010 (3), Autosomal recessive; GM1-gangliosidosis, type II, 230600 (3), Autosomal recessive	AR
ARSB	611542	5q14.1	Mucopolysaccharidosis type VI (Maroteaux-Lamy), 253200 (3), Autosomal recessive	AR
GUSB	611499	7q11.21	Mucopolysaccharidosis VII, 253220 (3), Autosomal recessive	AR
HYAL1	607071	3p21.31	Mucopolysaccharidosis type IX, 601492 (3), Autosomal recessive	AR
TRIM37	605073	17q22	Mulibrey nanism, 253250 (3), Autosomal recessive	AR
PIGN	606097	18q21.33	Multiple congenital anomalies-hypotonia-seizures syndrome 1, 614080 (3), Autosomal recessive	AR
CHRNG	100730	2q37.1	Multiple pterygium syndrome, lethal type, 253290 (3), Autosomal recessive; Escobar syndrome, 265000 (3), Autosomal recessive	AR
SUMF1	607939	3p26.1	Multiple sulfatase deficiency, 272200 (3), Autosomal recessive	AR
POMGNT1	606822	1p34.1	Muscular dystrophy-dystroglycanopathy (limb-girdle), type C, 3, 613157 (3), Autosomal recessive; Muscular dystrophy-dystroglycanopathy (congenital with impaired intellectual development), type B, 3, 613151 (3), Autosomal recessive; Retinitis pigmentosa 76, 617123 (3), Autosomal recessive; Muscular dystrophy-dystroglycanopathy (congenital with brain and eye anomalies), type A, 3, 253280 (3), Autos…	AR
TYMP	131222	22q13.33	Mitochondrial DNA depletion syndrome 1 (MNGIE type), 603041 (3), Autosomal recessive	AR
MTM1	300415	Xq28	Myopathy, centronuclear, X-linked, 310400 (3), X-linked recessive	XLR
NAGS	608300	17q21.31	N-acetylglutamate synthase deficiency, 237310 (3), Autosomal recessive	AR
NEB	161650	2q23.3	Nemaline myopathy 2, autosomal recessive, 256030 (3), Autosomal recessive; Arthrogryposis multiplex congenita 6, 619334 (3), Autosomal recessive	AR
AVPR2	300538	Xq28	Diabetes insipidus, nephrogenic, 1, 304800 (3), X-linked recessive; Nephrogenic syndrome of inappropriate antidiuresis, 300539 (3), X-linked recessive	XLR
AQP2	107777	12q13.12	Diabetes insipidus, nephrogenic, 2, 125800 (3), Autosomal recessive, Autosomal dominant	AR_AD
INVS	243305	9q31.1	Nephronophthisis 2, infantile, 602088 (3), Autosomal recessive	AR
NPHS1	602716	19q13.12	Nephrotic syndrome, type 1, 256300 (3), Autosomal recessive	AR
NPHS2	604766	1q25.2	Nephrotic syndrome, type 2, 600995 (3), Autosomal recessive	AR
FOLR1	136430	11q13.4	Neurodegeneration due to cerebral folate transport deficiency, 613068 (3), Autosomal recessive	AR
PLAA	603873	9p21.2	Neurodevelopmental disorder with progressive microcephaly, spasticity, and brain anomalies, 617527 (3), Autosomal recessive	AR
CLN3	607042	16p12.1	Ceroid lipofuscinosis, neuronal, 3, 204200 (3), Autosomal recessive	AR
CLN5	608102	13q22.3	Ceroid lipofuscinosis, neuronal, 5, 256731 (3), Autosomal recessive	AR
CLN6	606725	15q23	Ceroid lipofuscinosis, neuronal, 6B (Kufs type), 204300 (3), Autosomal recessive; Ceroid lipofuscinosis, neuronal, 6A, 601780 (3), Autosomal recessive	AR
CLN8	607837	8p23.3	Ceroid lipofuscinosis, neuronal, 8, Northern epilepsy variant, 610003 (3), Autosomal recessive; Ceroid lipofuscinosis, neuronal, 8, 600143 (3), Autosomal recessive	AR
MFSD8	611124	4q28.2	Macular dystrophy with central cone involvement, 616170 (3), Autosomal recessive; Ceroid lipofuscinosis, neuronal, 7, 610951 (3), Autosomal recessive	AR
PPT1	600722	1p34.2	Ceroid lipofuscinosis, neuronal, 1, 256730 (3), Autosomal recessive	AR
TPP1	607998	11p15.4	Ceroid lipofuscinosis, neuronal, 2, 204500 (3), Autosomal recessive; Spinocerebellar ataxia, autosomal recessive 7, 609270 (3), Autosomal recessive	AR
SMPD1	607608	11p15.4	Niemann-Pick disease, type B, 607616 (3), Autosomal recessive; Niemann-Pick disease, type A, 257200 (3), Autosomal recessive	AR
NPC1	607623	18q11.2	Niemann-Pick disease, type C1, 257220 (3), Autosomal recessive; Niemann-Pick disease, type D, 257220 (3), Autosomal recessive	AR
NPC2	601015	14q24.3	Niemann-pick disease, type C2, 607625 (3), Autosomal recessive	AR
NBN	602667	8q21.3	Leukemia, acute lymphoblastic, 613065 (3); Aplastic anemia, 609135 (3); Nijmegen breakage syndrome, 251260 (3), Autosomal recessive	AR
GJB2	121011	13q12.11	Keratoderma, palmoplantar, with deafness, 148350 (3), Autosomal dominant; Deafness, autosomal recessive 1A, 220290 (3), Autosomal recessive, Digenic dominant; Deafness, autosomal dominant 3A, 601544 (3), Autosomal dominant; Hystrix-like ichthyosis with deafness, 602540 (3), Autosomal dominant; Bart-Pumphrey syndrome, 149200 (3), Autosomal dominant; Keratitis-ichthyosis-deafness syndrome, 148210 (…	AR_AD
TYRP1	115501	9p23	[Skin/hair/eye pigmentation, variation in, 11 (Melanesian blond hair)], 612271 (3); Albinism, oculocutaneous, type III, 203290 (3), Autosomal recessive	AR
TYR	606933	11q14.3	[Skin/hair/eye pigmentation 3, light/dark/freckling skin], 601800 (3), Autosomal dominant; [Skin/hair/eye pigmentation 3, blue/green eyes], 601800 (3), Autosomal dominant; {Melanoma, cutaneous malignant, susceptibility to, 8}, 601800 (3), Autosomal dominant; Albinism, oculocutaneous, type IB, 606952 (3), Autosomal recessive; Albinism, oculocutaneous, type IA, 203100 (3), Autosomal recessive	AR_AD
SLC45A2	606202	5p13.2	[Skin/hair/eye pigmentation 5, dark/light eyes], 227240 (3), Autosomal recessive; [Skin/hair/eye pigmentation 5, black/nonblack hair], 227240 (3), Autosomal recessive; Albinism, oculocutaneous, type IV, 606574 (3), Autosomal recessive; [Skin/hair/eye pigmentation 5, dark/fair skin], 227240 (3), Autosomal recessive	AR
WNT10A	606268	2q35	Schopf-Schulz-Passarge syndrome, 224750 (3), Autosomal recessive; Tooth agenesis, selective, 4, 150400 (3), Autosomal recessive, Autosomal dominant; Ectodermal dysplasia 16 (odontoonychodermal dysplasia), 257980 (3), Autosomal recessive	AR_AD
RAG2	179616	11p12	Severe combined immunodeficiency, B cell-negative, 601457 (3), Autosomal recessive; Combined cellular and humoral immune defects with granulomas, 233650 (3), Autosomal recessive; Omenn syndrome, 603554 (3), Autosomal recessive	AR
DCLRE1C	605988	10p13	Severe combined immunodeficiency, Athabascan type, 602450 (3), Autosomal recessive; Omenn syndrome, 603554 (3), Autosomal recessive	AR
RAG1	179615	11p12	Omenn syndrome, 603554 (3), Autosomal recessive; Severe combined immunodeficiency, B cell-negative, 601457 (3), Autosomal recessive; Combined cellular and humoral immune defects with granulomas, 233650 (3), Autosomal recessive; Alpha/beta T-cell lymphopenia with gamma/delta T-cell expansion, severe cytomegalovirus infection, and autoimmunity, 609889 (3)	AR
OAT	613349	10q26.13	Gyrate atrophy of choroid and retina with or without ornithinemia, 258870 (3), Autosomal recessive	AR
OTC	300461	Xp11.4	Ornithine transcarbamylase deficiency, 311250 (3), X-linked	XL
FKBP10	607063	17q21.2	Osteogenesis imperfecta, type XI, 610968 (3), Autosomal recessive; Bruck syndrome 1, 259450 (3), Autosomal recessive	AR
TCIRG1	604592	11q13.2	Osteopetrosis, autosomal recessive 1, 259700 (3), Autosomal recessive	AR
SNX10	614780	7p15.2	Osteopetrosis, autosomal recessive 8, 615085 (3), Autosomal recessive	AR
COL11A2	120290	6p21.32	Deafness, autosomal dominant 13, 601868 (3), Autosomal dominant; Otospondylomegaepiphyseal dysplasia, autosomal recessive, 215150 (3), Autosomal recessive; Fibrochondrogenesis 2, 614524 (3), Autosomal recessive, Autosomal dominant; Deafness, autosomal recessive 53, 609706 (3), Autosomal recessive; Otospondylomegaepiphyseal dysplasia, autosomal dominant, 184840 (3), Autosomal dominant	AR_AD
CTSC	602365	11q14.2	Periodontitis 1, juvenile, 170650 (3), Autosomal recessive; Haim-Munk syndrome, 245010 (3), Autosomal recessive; Papillon-Lefevre syndrome, 245000 (3), Autosomal recessive	AR
SLC26A4	605646	7q22.3	Deafness, autosomal recessive 4, with enlarged vestibular aqueduct, 600791 (3), Autosomal recessive; Pendred syndrome, 274600 (3), Autosomal recessive	AR
PEX12	601758	17q12	Peroxisome biogenesis disorder 3B, 266510 (3), Autosomal recessive; Peroxisome biogenesis disorder 3A (Zellweger), 614859 (3), Autosomal recessive	AR
PEX26	608666	22q11.21	Peroxisome biogenesis disorder 7B, 614873 (3), Autosomal recessive; Peroxisome biogenesis disorder 7A (Zellweger), 614872 (3), Autosomal recessive	AR
AMH	600957	19p13.3	Persistent Mullerian duct syndrome, type I, 261550 (3), Autosomal recessive	AR
AMHR2	600956	12q13.13	Persistent Mullerian duct syndrome, type II, 261550 (3), Autosomal recessive	AR
PAH	612349	12q23.2	[Hyperphenylalaninemia, non-PKU mild], 261600 (3), Autosomal recessive; Phenylketonuria, 261600 (3), Autosomal recessive	AR
PHGDH	606879	1p12	Neu-Laxova syndrome 1, 256520 (3), Autosomal recessive; Phosphoglycerate dehydrogenase deficiency, 601815 (3), Autosomal recessive	AR
PKHD1	606702	6p12.3-p12.2	Polycystic kidney disease 4, with or without hepatic disease, 263200 (3), Autosomal recessive	AR
AIRE	607358	21q22.3	Autoimmune polyendocrinopathy syndrome , type I, with or without reversible metaphyseal dysplasia, 240300 (3), Autosomal recessive, Autosomal dominant	AR_AD
VRK1	602168	14q32.2	Pontocerebellar hypoplasia type 1A, 607596 (3), Autosomal recessive; Neuronopathy, distal hereditary motor, autosomal recessive 10, 620542 (3), Autosomal recessive	AR
EXOSC3	606489	9p13.2	Pontocerebellar hypoplasia, type 1B, 614678 (3), Autosomal recessive	AR
TSEN54	608755	17q25.1	Pontocerebellar hypoplasia type 2A, 277470 (3), Autosomal recessive; Pontocerebellar hypoplasia type 4, 225753 (3), Autosomal recessive; ?Pontocerebellar hypoplasia type 5, 610204 (3), Autosomal recessive	AR
VPS53	615850	17p13.3	Pontocerebellar hypoplasia, type 2E, 615851 (3), Autosomal recessive	AR
RARS2	611524	6q15	Pontocerebellar hypoplasia, type 6, 611523 (3), Autosomal recessive	AR
SLC22A5	603377	5q31.1	Carnitine deficiency, systemic primary, 212140 (3), Autosomal recessive	AR
DNAAF19	614677	17q21.31	Ciliary dyskinesia, primary, 17, 614679 (3), Autosomal recessive	AR
ODAD3	615956	19p13.2	Ciliary dyskinesia, primary, 30, 616037 (3), Autosomal recessive	AR
CCDC39	613798	3q26.33	Ciliary dyskinesia, primary, 14, 613807 (3), Autosomal recessive	AR
DNAH5	603335	5p15.2	Ciliary dyskinesia, primary, 3, with or without situs inversus, 608644 (3), Autosomal recessive	AR
DNAI1	604366	9p13.3	Ciliary dyskinesia, primary, 1, with or without situs inversus, 244400 (3), Autosomal recessive	AR
DNAI2	605483	17q25.1	Ciliary dyskinesia, primary, 9, with or without situs inversus, 612444 (3), Autosomal recessive	AR
RSPH9	612648	6p21.1	Ciliary dyskinesia, primary, 12, 612650 (3), Autosomal recessive	AR
COQ4	612898	9q34.11	Coenzyme Q10 deficiency, primary, 7, 616276 (3), Autosomal recessive; Spastic ataxia 10, autosomal recessive, 620666 (3), Autosomal recessive	AR
CYP1B1	601771	2p22.2	Glaucoma 3A, primary open angle, congenital, juvenile, or adult onset, 231300 (3), Autosomal recessive; Anterior segment dysgenesis 6, multiple subtypes, 617315 (3), Autosomal recessive	AR
AGXT	604285	2q37.3	Hyperoxaluria, primary, type 1, 259900 (3), Autosomal recessive	AR
GRHPR	604296	9p13.2	Hyperoxaluria, primary, type II, 260000 (3), Autosomal recessive	AR
HOGA1	613597	10q24.2	Hyperoxaluria, primary, type III, 613616 (3), Autosomal recessive	AR
SEPSECS	613009	4p15.2	Pontocerebellar hypoplasia type 2D, 613811 (3), Autosomal recessive	AR
ABCB11	603201	2q31.1	Cholestasis, benign recurrent intrahepatic, 2, 605479 (3), Autosomal recessive; Cholestasis, progressive familial intrahepatic 2, 601847 (3), Autosomal recessive	AR
PRICKLE1	608500	12q12	Epilepsy, progressive myoclonic 1B, 612437 (3), Autosomal recessive	AR
CCN6	603400	6q21	Progressive pseudorheumatoid dysplasia, 208230 (3), Autosomal recessive	AR
PEPD	613230	19q13.11	Prolidase deficiency, 170100 (3), Autosomal recessive	AR
PCCA	232000	13q32.3	Propionicacidemia, 606054 (3), Autosomal recessive	AR
PCCB	232050	3q22.3	Propionicacidemia, 606054 (3), Autosomal recessive	AR
SRD5A2	607306	2p23.1	Pseudovaginal perineoscrotal hypospadias, 264600 (3), Autosomal recessive	AR
ABCA3	601615	16p13.3	Surfactant metabolism dysfunction, pulmonary, 3, 610921 (3), Autosomal recessive	AR
CTSK	601105	1q21.3	Pycnodysostosis, 265800 (3), Autosomal recessive	AR
PNPO	603287	17q21.32	Pyridoxamine 5'-phosphate oxidase deficiency, 610090 (3), Autosomal recessive	AR
ALDH7A1	107323	5q23.2	Epilepsy, early-onset, 4, vitamin B6-dependent, 266100 (3), Autosomal recessive	AR
PC	608786	11q13.2	Pyruvate carboxylase deficiency, 266150 (3), Autosomal recessive	AR
PDHA1	300502	Xp22.12	Pyruvate dehydrogenase E1-alpha deficiency, 312170 (3), X-linked dominant	XLD
PDHB	179060	3p14.3	Pyruvate dehydrogenase E1-beta deficiency, 614111 (3), Autosomal recessive	AR
PTS	612719	11q23.1	Hyperphenylalaninemia, BH4-deficient, A, 261640 (3), Autosomal recessive	AR
ATP6V1B1	192132	2p13.3	Distal renal tubular acidosis 2 with progressive sensorineural hearing loss, 267300 (3), Autosomal recessive	AR
EYS	612424	6q12	Retinitis pigmentosa 25, 602772 (3), Autosomal recessive	AR
CERKL	608381	2q31.3	Retinitis pigmentosa 26, 608380 (3), Autosomal recessive	AR
FAM161A	613596	2p15	Retinitis pigmentosa 28, 606068 (3), Autosomal recessive	AR
PRCD	610598	17q25.1	Retinitis pigmentosa 36, 610599 (3), Autosomal recessive	AR
DHDDS	608172	1p36.11	Developmental delay and seizures with or without movement abnormalities, 617836 (3), Autosomal dominant; ?Congenital disorder of glycosylation, type 1bb, 613861 (3), Autosomal recessive; Retinitis pigmentosa 59, 613861 (3), Autosomal recessive	AR_AD
CFAP418	614477	8q22.1	Retinitis pigmentosa 64, 614500 (3), Autosomal recessive; Cone-rod dystrophy 16, 614500 (3), Autosomal recessive; Bardet-Biedl syndrome 21, 617406 (3), Autosomal recessive	AR
RLBP1	180090	15q26.1	Bothnia retinal dystrophy, 607475 (3), Autosomal recessive; Newfoundland rod-cone dystrophy, 607476 (3); Retinitis punctata albescens, 136880 (3), Autosomal recessive, Autosomal dominant; Fundus albipunctatus, 136880 (3), Autosomal recessive, Autosomal dominant	AR_AD
RHAG	180297	6p12.3	Overhydrated hereditary stomatocytosis, 185000 (3), Autosomal dominant; Anemia, hemolytic, Rh-null, regulator type, 268150 (3), Autosomal recessive	AR_AD
PEX7	601757	6q23.3	Rhizomelic chondrodysplasia punctata, type 1, 215100 (3), Autosomal recessive; Peroxisome biogenesis disorder 9B, 614879 (3), Autosomal recessive	AR
AGPS	603051	2q31.2	Rhizomelic chondrodysplasia punctata, type 3, 600121 (3), Autosomal recessive	AR
ESCO2	609353	8p21.1	Juberg-Hayward syndrome, 216100 (3), Autosomal recessive; Roberts-SC phocomelia syndrome, 268300 (3), Autosomal recessive	AR
SLC17A5	604322	6q13	Salla disease, 604369 (3), Autosomal recessive; Sialic acid storage disorder, infantile, 269920 (3), Autosomal recessive	AR
ST3GAL5	604402	2p11.2	Salt and pepper developmental regression syndrome, 609056 (3), Autosomal recessive	AR
HEXB	606873	5q13.3	Sandhoff disease, infantile, juvenile, and adult forms, 268800 (3), Autosomal recessive	AR
SMARCAL1	606622	2q35	Schimke immunoosseous dysplasia, 242900 (3), Autosomal recessive	AR
CEP152	613529	15q21.1	Microcephaly 9, primary, autosomal recessive, 614852 (3), Autosomal recessive; Seckel syndrome 5, 613823 (3), Autosomal recessive	AR
TH	191290	11p15.5	Segawa syndrome, recessive, 605407 (3), Autosomal recessive	AR
SPR	182125	2p13.2	Dystonia, dopa-responsive, due to sepiapterin reductase deficiency, 612716 (3), Autosomal recessive, ?Autosomal dominant	AR_AD
IL7R	146661	5p13.2	Immunodeficiency 104, severe combined, 608971 (3), Autosomal recessive	AR
JAK3	600173	19p13.11	Severe combined immunodeficiency, autosomal recessive, T-negative/B-positive type, 600802 (3), Autosomal recessive	AR
PTPRC	151460	1q31.3-q32.1	Immunodeficiency 105, severe combined, 619924 (3), Autosomal recessive	AR
G6PC3	611045	17q21.31	Dursun syndrome, 612541 (3), Autosomal recessive; Neutropenia, severe congenital 4, autosomal recessive, 612541 (3), Autosomal recessive	AR
CASR	601199	3q13.33-q21.1	Hypocalcemia, autosomal dominant, with Bartter syndrome, 601198 (3), Autosomal dominant; Hyperparathyroidism, neonatal, 239200 (3), Autosomal recessive, Autosomal dominant; Hypocalcemia, autosomal dominant, 601198 (3), Autosomal dominant; Hypocalciuric hypercalcemia, type I, 145980 (3), Autosomal dominant; {?Epilepsy idiopathic generalized, susceptibility to, 8}, 612899 (3), Autosomal dominant	AR_AD
POC1A	614783	3p21.2	Short stature, onychodysplasia, facial dysmorphism, and hypotrichosis, 614813 (3), Autosomal recessive	AR
ACADS	606885	12q24.31	Acyl-CoA dehydrogenase, short-chain, deficiency of, 201470 (3), Autosomal recessive	AR
SBDS	607444	7q11.21	{Aplastic anemia, susceptibility to}, 609135 (3); Shwachman-Diamond syndrome 1, 260400 (3), Autosomal recessive	AR
NEU1	608272	6p21.33	Sialidosis, type II, 256550 (3), Autosomal recessive; Sialidosis, type I, 256550 (3), Autosomal recessive	AR
ALDH3A2	609523	17p11.2	Sjogren-Larsson syndrome, 270200 (3), Autosomal recessive	AR
DHCR7	602858	11q13.4	Smith-Lemli-Opitz syndrome, 270400 (3), Autosomal recessive	AR
ZFYVE26	612012	14q24.1	Spastic paraplegia 15, autosomal recessive, 270700 (3), Autosomal recessive	AR
SLC1A4	600229	2p14	Spastic tetraplegia, thin corpus callosum, and progressive microcephaly, 616657 (3), Autosomal recessive	AR
EPB42	177070	15q15.2	Spherocytosis, type 5, 612690 (3)
SMN1	600354	5q13.2	Spinal muscular atrophy-2, 253550 (3), Autosomal recessive; Spinal muscular atrophy-4, 271150 (3), Autosomal recessive; Spinal muscular atrophy-3, 253400 (3), Autosomal recessive; Spinal muscular atrophy-1, 253300 (3), Autosomal recessive	AR
IGHMBP2	600502	11q13.3	Charcot-Marie-Tooth disease, axonal, type 2S, 616155 (3), Autosomal recessive; Neuronopathy, distal hereditary motor, autosomal recessive 1, 604320 (3), Autosomal recessive	AR
COA7	615623	1p32.3	Spinocerebellar ataxia, autosomal recessive, with axonal neuropathy 3, 618387 (3), Autosomal recessive	AR
DLL3	602768	19q13.2	Spondylocostal dysostosis 1, autosomal recessive, 277300 (3), Autosomal recessive	AR
DDR2	191311	1q23.3	Warburg-Cinotti syndrome, 618175 (3), Autosomal dominant; Spondylometaepiphyseal dysplasia, short limb-hand type, 271665 (3), Autosomal recessive	AR_AD
MESP2	605195	15q26.1	Spondylocostal dysostosis 2, autosomal recessive, 608681 (3), Autosomal recessive	AR
ABCA4	601691	1p22.1	Retinal dystrophy, early-onset severe, 248200 (3), Autosomal recessive; Retinitis pigmentosa 19, 601718 (3), Autosomal recessive; {Macular degeneration, age-related, 2}, 153800 (3), Autosomal dominant; Cone-rod dystrophy 3, 604116 (3), Autosomal recessive; Fundus flavimaculatus, 248200 (3), Autosomal recessive; Stargardt disease 1, 248200 (3), Autosomal recessive	AR_AD
COL27A1	608461	9q32	Steel syndrome, 615155 (3), Autosomal recessive	AR
LIFR	151443	5p13.1	Stuve-Wiedemann syndrome/Schwartz-Jampel type 2 syndrome, 601559 (3), Autosomal recessive	AR
SLC26A2	606718	5q32	Epiphyseal dysplasia, multiple, 4, 226900 (3), Autosomal recessive; De la Chapelle dysplasia, 256050 (3), Autosomal recessive; Diastrophic dysplasia, 222600 (3), Autosomal recessive; Diastrophic dysplasia, broad bone-platyspondylic variant, 222600 (3), Autosomal recessive; Achondrogenesis Ib, 600972 (3), Autosomal recessive; Atelosteogenesis, type II, 256050 (3), Autosomal recessive	AR
HEXA	606869	15q23	[Hex A pseudodeficiency], 272800 (3), Autosomal recessive; GM2-gangliosidosis, several forms, 272800 (3), Autosomal recessive; Tay-Sachs disease, 272800 (3), Autosomal recessive	AR
SLC19A2	603941	1q24.2	Thiamine-responsive megaloblastic anemia syndrome, 249270 (3), Autosomal recessive	AR
F2	176930	11p11.2	Hypoprothrombinemia, 613679 (3), Autosomal recessive; {Pregnancy loss, recurrent, susceptibility to, 2}, 614390 (3), Autosomal dominant; Dysprothrombinemia, 613679 (3), Autosomal recessive; Thrombophilia 1 due to thrombin defect, 188050 (3), Autosomal dominant; {Stroke, ischemic, susceptibility to}, 601367 (3), Multifactorial	AR_AD
SLC5A5	601843	19p13.11	Thyroid dyshormonogenesis 1, 274400 (3), Autosomal recessive	AR
TPO	606765	2p25.3	Thyroid dyshormonogenesis 2A, 274500 (3), Autosomal recessive	AR
TG	188450	8q24.22	{Autoimmune thyroid disease, susceptibility to, 3}, 608175 (3); Thyroid dyshormonogenesis 3, 274700 (3), Autosomal recessive	AR
IYD	612025	6q25.1	Thyroid dyshormonogenesis 4, 274800 (3), Autosomal recessive	AR
DUOXA2	612772	15q21.1	Thyroid dyshormonogenesis 5, 274900 (3), Autosomal recessive	AR
DUOX2	606759	15q21.1	Thyroid dyshormonogenesis 6, 607200 (3), Autosomal recessive	AR
SKIC3	614589	5q15	Trichohepatoenteric syndrome 1, 222470 (3), Autosomal recessive	AR
FAH	613871	15q25.1	Tyrosinemia, type I, 276700 (3), Autosomal recessive	AR
TAT	613018	16q22.2	Tyrosinemia, type II, 276600 (3), Autosomal recessive	AR
HPD	609695	12q24.31	Hawkinsinuria, 140350 (3), Autosomal dominant; Tyrosinemia, type III, 276710 (3), Autosomal recessive	AR_AD
MYO7A	276903	11q13.5	Deafness, autosomal recessive 2, 600060 (3), Autosomal recessive; Usher syndrome, type 1B, 276900 (3), Autosomal recessive; Deafness, autosomal dominant 11, 601317 (3), Autosomal dominant	AR_AD
USH1C	605242	11p15.1	Usher syndrome, type 1C, 276904 (3), Autosomal recessive; Deafness, autosomal recessive 18A, 602092 (3), Autosomal recessive	AR
CDH23	605516	10q22.1	Usher syndrome, type 1D, 601067 (3), Autosomal recessive, Digenic recessive; {Pituitary adenoma 5, multiple types}, 617540 (3), Autosomal dominant; Usher syndrome, type 1D/F digenic, 601067 (3), Autosomal recessive, Digenic recessive; Deafness, autosomal recessive 12, 601386 (3), Autosomal recessive	AR_AD
PCDH15	605514	10q21.1	Usher syndrome, type 1D/F digenic, 601067 (3), Autosomal recessive, Digenic recessive; Deafness, autosomal recessive 23, 609533 (3), Autosomal recessive; Usher syndrome, type 1F, 602083 (3), Autosomal recessive	AR
USH2A	608400	1q41	Usher syndrome, type 2A, 276901 (3), Autosomal recessive; Retinitis pigmentosa 39, 613809 (3), Autosomal recessive	AR
CLRN1	606397	3q25.1	Usher syndrome, type 3A, 276902 (3), Autosomal recessive; Retinitis pigmentosa 61, 614180 (3)	AR
ACADVL	609575	17p13.1	VLCAD deficiency, 201475 (3), Autosomal recessive	AR
CYP27B1	609506	12q14.1	Vitamin D-dependent rickets, type I, 264700 (3), Autosomal recessive	AR
VDR	601769	12q13.11	Rickets, vitamin D-resistant, type IIA, 277440 (3), Autosomal recessive	AR
VWF	613160	12p13.31	von Willebrand disease, type 1, 193400 (3), Autosomal dominant; von Willebrand disease, types 2A, 2B, 2M, and 2N, 613554 (3), Autosomal recessive, Autosomal dominant; von Willebrand disease, type 3, 277480 (3), Autosomal recessive	AR_AD
FKTN	607440	9q31.2	Muscular dystrophy-dystroglycanopathy (limb-girdle), type C, 4, 611588 (3), Autosomal recessive; Muscular dystrophy-dystroglycanopathy (congenital with brain and eye anomalies), type A, 4, 253800 (3), Autosomal recessive; Cardiomyopathy, dilated, 1X, 611615 (3), Autosomal recessive; Muscular dystrophy-dystroglycanopathy (congenital without impaired intellectual development), type B, 4, 613152 (3)…	AR
WRN	604611	8p12	Werner syndrome, 277700 (3), Autosomal recessive	AR
ATP7B	606882	13q14.3	Wilson disease, 277900 (3), Autosomal recessive	AR
WAS	300392	Xp11.23	Wiskott-Aldrich syndrome, 301000 (3), X-linked recessive; Neutropenia, severe congenital, X-linked, 300299 (3), X-linked recessive; Thrombocytopenia, X-linked, intermittent, 313900 (3), X-linked recessive; Thrombocytopenia, X-linked, 313900 (3), X-linked recessive	XLR
EIF2AK3	604032	2p11.2	Wolcott-Rallison syndrome, 226980 (3), Autosomal recessive	AR
LIPA	613497	10q23.31	Wolman disease, 620151 (3), Autosomal recessive; Cholesteryl ester storage disease, 278000 (3), Autosomal recessive	AR
DCAF17	612515	2q31.1	Woodhouse-Sakati syndrome, 241080 (3), Autosomal recessive	AR
POLH	603968	6p21.1	Xeroderma pigmentosum, variant type, 278750 (3), Autosomal recessive	AR
XPA	611153	9q22.33	Xeroderma pigmentosum, group A, 278700 (3), Autosomal recessive	AR
XPC	613208	3p25.1	Xeroderma pigmentosum, group C, 278720 (3), Autosomal recessive	AR
ERCC5	133530	13q33.1	Xeroderma pigmentosum, group G, 278780 (3), Autosomal recessive; Cerebrooculofacioskeletal syndrome 3, 616570 (3), Autosomal recessive; Xeroderma pigmentosum, group G/Cockayne syndrome, 278780 (3), Autosomal recessive	AR
RS1	300839	Xp22.13	Retinoschisis, 312700 (3), X-linked recessive	XLR
IL2RG	308380	Xq13.1	Combined immunodeficiency, X-linked, moderate, 312863 (3), X-linked recessive; Severe combined immunodeficiency, X-linked, 300400 (3), X-linked recessive	XLR
PEX10	602859	1p36.32	Peroxisome biogenesis disorder 6A (Zellweger), 614870 (3), Autosomal recessive; Peroxisome biogenesis disorder 6B, 614871 (3), Autosomal recessive	AR
PEX1	602136	7q21.2	Heimler syndrome 1, 234580 (3), Autosomal recessive; Peroxisome biogenesis disorder 1B (NALD/IRD), 601539 (3), Autosomal recessive; Peroxisome biogenesis disorder 1A (Zellweger), 214100 (3), Autosomal recessive	AR
PEX2	170993	8q21.13	Peroxisome biogenesis disorder 5A (Zellweger), 614866 (3), Autosomal recessive; Peroxisome biogenesis disorder 5B, 614867 (3), Autosomal recessive	AR
PEX6	601498	6p21.1	Peroxisome biogenesis disorder 4B, 614863 (3), Autosomal recessive, Autosomal dominant; Peroxisome biogenesis disorder 4A (Zellweger), 614862 (3), Autosomal recessive; Heimler syndrome 2, 616617 (3), Autosomal recessive	AR_AD

## Sheet: S5-Carrier Gene List
MIM_Number	Aproved_Gene_Name	Chromosome	Disease	Inheritance	Source_of_inheritance
605378	AAAS	chr12	Achalasia-Addisonianism-Alacrimia Syndrome	AR	OMIM
607800	ABCA12	chr2	Congenital Ichthyosis 4A and 4B	AR	OMIM
601615	ABCA3	chr16	Pulmonary Surfactant Dysfunction	AR	OMIM
601691	ABCA4	chr1	Stargardt Disease and Other ABCA4-related Ocular Disorders	AR_AD	OMIM
603201	ABCB11	chr2	Progressive Familial Intrahepatic Cholestasis, Type 2	AR	OMIM
600509	ABCC8	chr11	Familial Hyperinsulinism	AR_AD	OMIM
300371	ABCD1	chrX	Adrenoleukodystrophy (X-linked)	XLR	OMIM
611103	ACAD9	chr3	Mitochondrial Complex I Deficiency	AR	OMIM
607008	ACADM	chr1	Medium Chain Acyl-CoA Dehydrogenase Deficiency	AR	OMIM
606885	ACADS	chr12	Short-chain Acyl-CoA Dehydrogenase Deficiency	AR	OMIM
600301	ACADSB	chr10	2-Methylbutyrylglycinuria	AR	OMIM
609575	ACADVL	chr17	Very Long Chain Acyl-CoA Dehydrogenase Deficiency	AR	OMIM
607809	ACAT1	chr11	Beta-Ketothiolase Deficiency	AR	OMIM
609751	ACOX1	chr17	Acyl-CoA Oxidase I Deficiency	AR_AD	OMIM
614245	ACSF3	chr16	Combined Malonic and Methylmalonic Aciduria	AR	OMIM
608958	ADA	chr20	Adenosine Deaminase Deficiency	AR	OMIM
604539	ADAMTS2	chr5	Ehlers-Danlos Syndrome, Type VIIC	AR	OMIM
613228	AGA	chr4	Aspartylglycosaminuria	AR	OMIM
610860	AGL	chr1	Glycogen Storage Disease, Type III	AR	OMIM
603051	AGPS	chr2	Rhizomelic Chondrodysplasia Punctata, Type 3	AR	OMIM
604285	AGXT	chr2	Primary Hyperoxaluria, Type 1	AR	OMIM
603605	AIMP1	chr4	Hypomyelinating Leukodystrophy 3	AR	OMIM
604392	AIPL1	chr17	Leber Congenital Amaurosis 4	AR_AD	OMIM
607358	AIRE	chr21	Polyglandular Autoimmune Syndrome, Type 1	AR_AD	OMIM
604741	AKR1D1	chr7	Congenital Bile Acid Synthesis Defect	AR	OMIM
609523	ALDH3A2	chr17	Sjogren-Larsson Syndrome	AR	OMIM
107323	ALDH7A1	chr5	Pyridoxine-Dependent Epilepsy	AR	OMIM
612724	ALDOB	chr9	Hereditary Fructose Intolerance	AR	OMIM
604566	ALG6	chr1	Congenital Disorder of Glycosylation, Type Ic	AR	OMIM
606844	ALMS1	chr2	Alstrom Syndrome	AR	OMIM
171760	ALPL	chr1	Hypophosphatasia	AR_AD	OMIM
600957	AMH	chr19	Persistent Mullerian Duct Syndrome, Type I	AR	OMIM
600956	AMHR2	chr12	Persistent Mullerian Duct Syndrome, Type II	AR	OMIM
605799	AMN	chr14	Megaloblastic Anemia 1	AR	OMIM
238310	AMT	chr3	Glycine Encephalopathy	AR	OMIM
608662	ANO5	chr11	Limb-Girdle Muscular Dystrophy, Type 2L	AR_AD	OMIM
603531	AP1S1	chr7	MEDNIK Syndrome	AR	OMIM
616003	COA8	chr14	Mitochondrial Complex IV Deficiency	AR	OMIM
107777	AQP2	chr12	Nephrogenic Diabetes Insipidus, Type II	AR_AD	OMIM
608313	ARG1	chr6	Argininemia	AR	OMIM
608845	ARL6	chr3	Bardet-Biedl Syndrome	AR	OMIM
607574	ARSA	chr22	Metachromatic Leukodystrophy	AR	OMIM
611542	ARSB	chr5	Mucopolysaccharidosis Type VI	AR	OMIM
300180	ARSL	chrX	Chondrodysplasia Punctata (X-linked)	XLR	OMIM
608310	ASL	chr7	Argininosuccinic Aciduria	AR	OMIM
108370	ASNS	chr7	Asparagine Synthetase Deficiency	AR	OMIM
608034	ASPA	chr17	Canavan Disease	AR	OMIM
603470	ASS1	chr9	Citrullinemia, Type 1	AR	OMIM
607585	ATM	chr11	Ataxia-Telangiectasia	AR_AD	OMIM
192132	ATP6V1B1	chr2	Renal Tubular Acidosis and Deafness	AR	OMIM
300011	ATP7A	chrX	Menkes Disease (X-linked)	XLR	OMIM
606882	ATP7B	chr13	Wilson Disease	AR	OMIM
602397	ATP8B1	chr18	Intrahepatic Cholestasis	AR_AD	OMIM
300032	ATRX	chrX	Alpha-Thalassemia Mental Retardation Syndrome (X-linked)	XLR	OMIM
300538	AVPR2	chrX	Nephrogenic Diabetes Insipidus / Nephrogenic Syndrome (X-linked)	XLR	OMIM
209901	BBS1	chr11	Bardet-Biedl Syndrome	AR	OMIM
610148	BBS10	chr12	Bardet-Biedl Syndrome	AR	OMIM
610683	BBS12	chr4	Bardet-Biedl Syndrome	AR	OMIM
606151	BBS2	chr16	Bardet-Biedl Syndrome	AR	OMIM
600374	BBS4	chr15	Bardet-Biedl Syndrome	AR	OMIM
177400	BCHE	chr3	Butyrylcholinesterase Deficiency	AR	OMIM
608348	BCKDHA	chr19	Maple Syrup Urine Disease, Type 1a	AR	OMIM
248611	BCKDHB	chr6	Maple Syrup Urine Disease, Type 1b	AR	OMIM
603647	BCS1L	chr2	GRACILE Syndrome and Other BCS1L-Related Disorders	AR	OMIM
604610	BLM	chr15	Bloom Syndrome	AR	OMIM
608699	BMPER	chr7	Diaphanospondylodysostosis	AR	OMIM
606412	BSND	chr1	Bartter Syndrome, Type 4A	AR	OMIM
609019	BTD	chr3	Biotinidase Deficiency	AR	OMIM
300300	BTK	chrX	Agammaglobulinemia (X-linked)	XLR	OMIM
614477	CFAP418	chr8	Retinitis Pigmentosa 64 / Bardet-Biedl Syndrome 21 / Cone-rod Dystrophy 16	AR	OMIM
613165	CANT1	chr17	Desbuquois Dysplasia 1	AR	OMIM
114240	CAPN3	chr15	Limb-Girdle Muscular Dystrophy, Type 2A	AR_AD	OMIM
114251	CASQ2	chr1	Catecholaminergic Polymorphic Ventricular Tachycardia	AR	OMIM
601199	CASR	chr3	Severe Neonatal Hyperparathyroidism	AR_AD	OMIM
613381	CBS	chr21	Homocystinuria	AR	OMIM
610055	CC2D1A	chr19	Mental Retardation, Autosomal Recessive 3	AR	OMIM
614677	DNAAF19	chr17	Primary Ciliary Dyskinesia	AR	OMIM
615956	ODAD3	chr19	Primary Ciliary Dyskinesia	AR	OMIM
613798	CCDC39	chr3	Primary Ciliary Dyskinesia	AR	OMIM
186790	CD3D	chr11	Immunodeficiency 19	AR	OMIM
186830	CD3E	chr11	Immunodeficiency 18	AR	OMIM
300386	CD40LG	chrX	Hyper-IgM Syndrome (X-linked)	XLR	OMIM
107271	CD59	chr11	CD59-mediated Hemolytic Anemia	AR	OMIM
607465	CDAN1	chr15	Congenital Dyserythropoietic Anemia, Type Ia	AR	OMIM
605516	CDH23	chr10	Usher Syndrome, Type ID	AR_AD	OMIM
613529	CEP152	chr15	Seckel Syndrome 5 / Microcephaly 9	AR	OMIM
610142	CEP290	chr12	Leber Congenital Amaurosis 10 and Other CEP290-Related Ciliopathies	AR	OMIM
608381	CERKL	chr2	Retinitis Pigmentosa 26	AR	OMIM
602421	CFTR	chr7	Cystic Fibrosis	AR_AD	OMIM
118490	CHAT	chr10	Congenital Myasthenic Syndrome	AR	OMIM
300390	CHM	chrX	Choroideremia (X-linked)	XL	OMIM
100725	CHRNE	chr17	Congenital Myasthenic Syndrome	AR_AD	OMIM
100730	CHRNG	chr2	Multiple Pterygium Syndrome	AR	OMIM
600005	CIITA	chr16	Bare Lymphocyte Syndrome, Type II	AR	OMIM
602023	CLCNKB	chr1	Bartter Syndrome, Type 3	AR	OMIM
607042	CLN3	chr16	Neuronal Ceroid-Lipofuscinosis	AR	OMIM
608102	CLN5	chr13	Neuronal Ceroid-Lipofuscinosis	AR	OMIM
606725	CLN6	chr15	Neuronal Ceroid-Lipofuscinosis	AR	OMIM
607837	CLN8	chr8	Neuronal Ceroid-Lipofuscinosis	AR	OMIM
606397	CLRN1	chr3	Usher Syndrome, Type III	AR	OMIM
600053	CNGA3	chr2	Achromatopsia	AR	OMIM
605080	CNGB3	chr8	Achromatopsia	AR	OMIM
615623	COA7	chr1	Spinocerebellar Ataxia with Axonal Neuropathy 3	AR	OMIM
120290	COL11A2	chr6	Otospondylomegaepiphyseal Dysplasia / Deafness / Fibrochondrogenesis 2	AR_AD	OMIM
113811	COL17A1	chr10	Junctional Epidermolysis Bullosa	AR_AD	OMIM
608461	COL27A1	chr9	Steel Syndrome	AR	OMIM
120070	COL4A3	chr2	Alport Syndrome	AR_AD	OMIM
120131	COL4A4	chr2	Alport Syndrome	AR_AD	OMIM
303630	COL4A5	chrX	Alport Syndrome (X-linked)	XLD	OMIM
120120	COL7A1	chr3	Dystrophic Epidermolysis Bullosa	AR_AD	OMIM
612898	COQ4	chr9	Primary Coenzyme Q10 Deficiency 7	AR	OMIM
602125	COX10	chr17	Mitochondrial Complex IV Deficiency / Leigh Syndrome	AR	OMIM
603646	COX15	chr10	Cytochrome C Oxidase Deficiency / Leigh Syndrome	AR	OMIM
614698	COX20	chr1	Mitochondrial Complex IV Deficiency	AR	OMIM
124089	COX6B1	chr19	Mitochondrial Complex IV Deficiency	AR	OMIM
608307	CPS1	chr2	Carbamoylphosphate Synthetase I Deficiency	AR	OMIM
600528	CPT1A	chr11	Carnitine Palmitoyltransferase IA Deficiency	AR	OMIM
600650	CPT2	chr1	Carnitine Palmitoyltransferase II Deficiency	AR_AD	OMIM
604210	CRB1	chr1	Leber Congenital Amaurosis 8 / Retinitis Pigmentosa 12 / Pigmented Paravenous Chorioretinal Atrophy	AR_AD	OMIM
606272	CTNS	chr17	Cystinosis	AR	OMIM
613111	CTSA	chr20	Galactosialidosis	AR	OMIM
602365	CTSC	chr11	Papillon-Lefevre Syndrome	AR	OMIM
601105	CTSK	chr1	Pycnodysostosis	AR	OMIM
608508	CYBA	chr16	Chronic Granulomatous Disease	AR	OMIM
300481	CYBB	chrX	Chronic Granulomatous Disease (X-linked)	XLR	OMIM
118485	CYP11A1	chr15	Congenital Adrenal Insufficiency	AR	HGMD
610613	CYP11B1	chr8	Congenital Adrenal Hyperplasia due to 11-Beta-Hydroxylase Deficiency	AR_AD	OMIM
124080	CYP11B2	chr8	Corticosterone Methyloxidase Deficiency	AR	OMIM
609300	CYP17A1	chr10	Congenital Adrenal Hyperplasia due to17-Alpha-Hydroxylase Deficiency	AR	OMIM
107910	CYP19A1	chr15	Aromatase Deficiency	AD	HGMD
601771	CYP1B1	chr2	Primary Congenital Glaucoma	AR	OMIM
613815	CYP21A2	chr6	Congenital Adrenal Hyperplasia due to 21-Alpha-Hydroxylase Deficiency	AR	OMIM
606530	CYP27A1	chr2	Cerebrotendinous Xanthomatosis	AR	OMIM
609506	CYP27B1	chr12	Vitamin D-Dependent Rickets, Type I	AR	OMIM
248610	DBT	chr1	Maple Syrup Urine Disease, Type 2	AR	OMIM
612515	DCAF17	chr2	Woodhouse-Sakati Syndrome	AR	OMIM
605988	DCLRE1C	chr10	Omenn Syndrome / Severe Combined Immunodeficiency, Athabaskan-Type	AR	OMIM
191311	DDR2	chr1	Spondylometaepiphyseal Dysplasia	AR_AD	OMIM
601465	DGUOK	chr2	Mitochondrial DNA Depletion Syndrome 3	AR	OMIM
606418	DHCR24	chr1	Desmosterolosis	AR	OMIM
602858	DHCR7	chr11	Smith-Lemli-Opitz Syndrome	AR	OMIM
608172	DHDDS	chr1	Retinitis Pigmentosa 59	AR_AD	OMIM
300126	DKC1	chrX	Dyskeratosis Congenita (X-linked)	XLR	OMIM
238331	DLD	chr7	Lipoamide Dehydrogenase Deficiency	AR	OMIM
602768	DLL3	chr19	Spondylocostal Dysostosis 1	AR	OMIM
300377	DMD	chrX	Duchenne Muscular Dystrophy / Becker Muscular Dystrophy (X-linked)/Cardiomyopathy, dilated, 3B	XLR_XLD_XL	OMIM
603335	DNAH5	chr5	Primary Ciliary Dyskinesia	AR	OMIM
604366	DNAI1	chr9	Primary Ciliary Dyskinesia	AR	OMIM
605483	DNAI2	chr17	Primary Ciliary Dyskinesia	AR	OMIM
610285	DOK7	chr4	Congenital Myasthenic Syndrome	AR	OMIM
610746	DOLK	chr9	Congenital Disorder of Glycosylation, Type Im	AR	OMIM
612779	DPYD	chr1	Dihydropyrimidine Dehydrogenase Deficiency / 5-Fluorouracil Toxicity	AR	OMIM
606759	DUOX2	chr15	Thyroid Dyshormonogenesis 6	AR	OMIM
612772	DUOXA2	chr15	Thyroid Dyshormonogenesis 5	AR	OMIM
603009	DYSF	chr2	Limb-Girdle Muscular Dystrophy, Type 2B	AR	OMIM
300451	EDA	chrX	Hypohidrotic Ectodermal Dysplasia 1 (X-linked)	XLR	OMIM
604032	EIF2AK3	chr2	Wolcott-Rallison Syndrome	AR	OMIM
603945	EIF2B5	chr3	Leukoencephalopathy with Vanishing White Matter	AR	OMIM
300384	EMD	chrX	Emery-Dreifuss Myopathy 1 (X-linked)	XLR	OMIM
614789	EOGT	chr3	Adams-Oliver Syndrome 4	AR	OMIM
177070	EPB42	chr15	Spherocytosis, Type 5	AR	HGMD
190151	ERBB3	chr12	Lethal Congenital Contracture Syndrome 2	AR_AD	OMIM
133530	ERCC5	chr13	Xeroderma Pigmentosum, Group G	AR	OMIM
609413	ERCC6	chr10	Cockayne Syndrome, Type B and Other ERCC6-related Disorders	AR_AD	OMIM
609412	ERCC8	chr5	Cockayne Syndrome, Type A	AR	OMIM
609353	ESCO2	chr8	Roberts Syndrome	AR	OMIM
608053	ETFA	chr15	Glutaric Acidemia, Type IIa	AR	OMIM
130410	ETFB	chr19	Glutaric Acidemia, Type IIb	AR	OMIM
231675	ETFDH	chr4	Glutaric Acidemia, Type IIc	AR	OMIM
608451	ETHE1	chr19	Ethylmalonic Encephalopathy	AR	OMIM
604831	EVC	chr4	Ellis-van Creveld Syndrome	AR_AD	OMIM
607261	EVC2	chr4	Ellis-van Creveld Syndrome	AR_AD	OMIM
606489	EXOSC3	chr9	Pontocerebellar Hypoplasia, Type 1B	AR	OMIM
612424	EYS	chr6	Retinitis Pigmentosa 25	AR	OMIM
264900	F11	chr4	Factor XI Deficiency	AR_AD	OMIM
176930	F2	chr11	Thrombophilia Due to Thrombin Defect and Congenital Prothrombin Deficiency	AR_AD	OMIM
612309	F5	chr1	Factor V Deficiency and Thrombophilia Due to Activated Protein C Resistance	AR_AD	OMIM
613878	F7	chr13	Factor VII Deficiency	AR	OMIM
300746	F9	chrX	Factor IX Deficiency (X-linked)	XLR	OMIM
613871	FAH	chr15	Tyrosinemia, Type I	AR	OMIM
613596	FAM161A	chr2	Retinitis Pigmentosa 28	AR	OMIM
607139	FANCA	chr16	Fanconi Anemia, Group A	AR	OMIM
613899	FANCC	chr9	Fanconi Anemia, Group C	AR	OMIM
602956	FANCG	chr9	Fanconi Anemia, Group G	AR	OMIM
611570	FBP1	chr9	* Fructose-1,6-Bisphosphatase Deficiency	AR	OMIM
136850	FH	chr1	Fumarase Deficiency	AR_AD	OMIM
607063	FKBP10	chr17	Osteogenesis Imperfecta, Type XI	AR	OMIM
606596	FKRP	chr19	Limb-Girdle Muscular Dystrophy, Type 2I	AR	OMIM
607440	FKTN	chr9	Walker-Warburg Syndrome and Other FKTN-Related Dystrophies	AR	OMIM
309550	FMR1	chrX	Fragile X Syndrome (X-linked)	XLD	OMIM
136430	FOLR1	chr11	Neurodegeneration Due to Cerebral Folate Transport Deficiency	AR	OMIM
613622	FOXRED1	chr11	Mitochondrial Complex I Deficiency / Leigh Syndrome	AR	OMIM
616305	FRMD4A	chr10	Agenesis of the Corpus Callosum	AR	OMIM
612280	FUCA1	chr1	Fucosidosis	AR	OMIM
613742	G6PC1	chr17	Glycogen Storage Disease, Type Ia	AR	OMIM
611045	G6PC3	chr17	Severe Congenital Neutropenia 4	AR	OMIM
305900	G6PD	chrX	Hemolytic Anemia (X-linked)	XL	OMIM
606800	GAA	chr17	Glycogen Storage Disease, Type II	AR	OMIM
606890	GALC	chr14	Krabbe Disease	AR	OMIM
606953	GALE	chr1	Galactose Epimerase Deficiency	AR	OMIM
604313	GALK1	chr17	Galactokinase Deficiency	AR	OMIM
612222	GALNS	chr16	Mucopolysaccharidosis Type IVa	AR	OMIM
601756	GALNT3	chr2	Familial Hyperphosphatemic Tumoral Calcinosis	AR	OMIM
606999	GALT	chr9	Galactosemia	AR	OMIM
601240	GAMT	chr19	Cerebral Creatine Deficiency Syndrome 2	AR	OMIM
602360	GATM	chr15	Cerebral Creatine Deficiency Syndrome 3	AR_AD	OMIM
230800	GBA1	chr1	Gaucher Disease	AR	OMIM
607839	GBE1	chr3	Glycogen Storage Disease, Type IV / Adult Polyglucosan Body Disease	AR	OMIM
608801	GCDH	chr19	Glutaric Acidemia, Type I	AR	OMIM
601146	GDF5	chr20	Brachydactyly and other GDF5-related skeletal disorders	AR_AD	OMIM
606639	GFM1	chr3	Combined Oxidative Phosphorylation Deficiency 1	AR	OMIM
600946	GHR	chr5	Laron Dwarfism	AR_AD	OMIM
139191	GHRHR	chr7	Growth Hormone Deficiency, Type IB	AR	OMIM
304040	GJB1	chrX	Charcot-Marie-Tooth Disease (X-linked)	XLD	OMIM
121011	GJB2	chr13	Non-Syndromic Hearing Loss	AR_AD	OMIM
604418	GJB6	chr13	Nonsyndromic Hearing Loss and Deafness: GJB6 Related DFNB1	AR_AD	OMIM
300644	GLA	chrX	Fabry Disease (X-linked)	XL	OMIM
611458	GLB1	chr3	Mucopolysaccharidosis Type IVb / GM1 Gangliosidosis	AR	OMIM
238300	GLDC	chr9	Glycine Encephalopathy	AR	OMIM
603371	GLE1	chr9	Lethal Congenital Contracture Syndrome 1 / Lethal Arthrogryposis with Anterior Horn Cell Disease	AR	OMIM
603824	GNE	chr9	Inclusion Body Myopathy 2	AR_AD	OMIM
607840	GNPTAB	chr12	Mucolipidosis II / IIIA	AR	OMIM
607838	GNPTG	chr16	Mucolipidosis III Gamma	AR	OMIM
607664	GNS	chr12	Mucopolysaccharidosis Type IIID	AR	OMIM
607983	GORAB	chr1	Geroderma Osteodysplasticum	AR	OMIM
606672	GP1BA	chr17	Bernard-Soulier Syndrome, Type A1	AR_AD	OMIM
173515	GP9	chr3	Bernard-Soulier Syndrome, Type C	AR	OMIM
604110	ADGRG1	chr16	Bilateral Frontoparietal Polymicrogyria	AR	OMIM
604296	GRHPR	chr9	Primary Hyperoxaluria, Type 2	AR	OMIM
601002	GSS	chr20	Glutathione Synthetase Deficiency	AR	OMIM
600179	GUCY2D	chr17	Cone-Rod Dystrophy 6 / Leber Congenital Amaurosis 1	AR_AD	OMIM
611499	GUSB	chr7	Mucopolysaccharidosis VII	AR	OMIM
138571	GYS2	chr12	Glycogen Storage Disease, Type 0	AR	OMIM
601609	HADH	chr4	Familial Hyperinsulinemic Hypoglycemia 4 / 3-Hydroxyacyl-CoA Dehydrogenase Deficiency	AR	OMIM
600890	HADHA	chr2	Long-Chain 3-Hydroxyacyl-CoA Dehydrogenase Deficiency	AR	OMIM
143450	HADHB	chr2	Mitochondrial Trifunctional Protein Deficiency	AR	OMIM
605998	HAX1	chr1	Congenital Neutropenia	AR	OMIM
141800	HBA1	chr16	Alpha-Thalassemia	AD	OMIM
141850	HBA2	chr16	Alpha-Thalassemia	AD	OMIM
141900	HBB	chr11	Beta-Globin-Related Hemoglobinopathies	AR_AD	OMIM
606869	HEXA	chr15	Tay-Sachs Disease	AR	OMIM
606873	HEXB	chr5	Sandhoff Disease	AR	OMIM
613609	HFE	chr6	Hemochromatosis, type 1	AR	OMIM
608374	HJV	chr1	Hemochromatosis, Type 2A	AR	OMIM
607474	HGD	chr3	Alkaptonuria	AR	OMIM
610453	HGSNAT	chr8	Mucopolysaccharidosis Type IIIC	AR	OMIM
609018	HLCS	chr21	Holocarboxylase Synthetase Deficiency	AR	OMIM
613898	HMGCL	chr1	HMG-CoA Lyase Deficiency	AR	OMIM
600234	HMGCS2	chr1	HMG-CoA Synthase 2 Deficiency	AR	OMIM
613597	HOGA1	chr10	Primary Hyperoxaluria, Type 3	AR	OMIM
609695	HPD	chr12	Tyrosinemia, Type III / Hawkinsinuria	AR_AD	OMIM
604982	HPS1	chr10	Hermansky-Pudlak Syndrome, Type 1	AR	OMIM
606118	HPS3	chr3	Hermansky-Pudlak Syndrome, Type 3	AR	OMIM
606682	HPS4	chr22	Hermansky-Pudlak Syndrome, Type 4	AR	OMIM
607522	HPS6	chr10	Hermansky-Pudlak Syndrome, Type 6	AR	OMIM
605573	HSD17B3	chr9	Male Pseudohermaphroditism with Gynecomastia	AR	OMIM
601860	HSD17B4	chr5	D-Bifunctional Protein Deficiency	AR	OMIM
613890	HSD3B2	chr1	3-Beta-Hydroxysteroid Dehydrogenase Type II Deficiency	AR	OMIM
607764	HSD3B7	chr16	Congenital Bile Acid Synthesis Defect	AR	OMIM
607071	HYAL1	chr3	Mucopolysaccharidosis Type IX	AR	OMIM
610693	HYLS1	chr11	Hydrolethalus Syndrome	AR	OMIM
300823	IDS	chrX	Mucopolysaccharidosis Type II (X-linked)	XLR	OMIM
252800	IDUA	chr4	Mucopolysaccharidosis Type I	AR	OMIM
600502	IGHMBP2	chr11	* Spinal Muscular Atrophy with Respiratory Distress 1 / CharcotMarie-Tooth Disease, Type 2	AR	OMIM
300137	IGSF1	chrX	Central Hypothyroidism and Testicular Enlargement (X-linked)	XLR	OMIM
603722	ELP1	chr9	Familial Dysautonomia	AR	OMIM
308380	IL2RG	chrX	X-Linked Severe Combined Immunodeficiency	XLR	OMIM
146661	IL7R	chr5	Severe Combined Immunodeficiency	AR	OMIM
243305	INVS	chr9	Nephronophthisis 2	AR	OMIM
607759	ITGA2B	chr17	Glanzmann Thrombasthenia	AR_AD	OMIM
147556	ITGA6	chr2	Junctional Epidermolysis Bullosa	AR	OMIM
173470	ITGB3	chr17	Glanzmann Thrombasthenia	AR_AD	OMIM
147557	ITGB4	chr17	Junctional Epidermolysis Bullosa	AR	OMIM
607036	IVD	chr15	Isovaleric Acidemia	AR	OMIM
612025	IYD	chr6	Thyroid Dyshormonogenesis 4	AR	OMIM
600173	JAK3	chr19	Severe Combined Immunodeficiency	AR	OMIM
600937	KCNJ11	chr11	Familial Hyperinsulinism	AR_AD	OMIM
308840	L1CAM	chrX	Hydrocephalus (X-linked)	XLR	OMIM
156225	LAMA2	chr6	Congenital Muscular Dystrophy	AR	OMIM
600805	LAMA3	chr18	Junctional Epidermolysis Bullosa	AR	OMIM
150310	LAMB3	chr1	Junctional Epidermolysis Bullosa	AR_AD	OMIM
150292	LAMC2	chr1	Junctional Epidermolysis Bullosa	AR	OMIM
611408	LCA5	chr6	Leber Congenital Amaurosis 5	AR	OMIM
606945	LDLR	chr19	Familial Hypercholesterolemia	AR_AD	OMIM
605747	LDLRAP1	chr1	Familial Autosomal Recessive Hypercholesterolemia	AR	OMIM
152790	LHCGR	chr2	Male Precocious Puberty and Other LHCGR-related Disorders	AR_AD	OMIM
600577	LHX3	chr9	Combined Pituitary Hormone Deficiency 3	AR	OMIM
151443	LIFR	chr5	Stuve-Wiedemann Syndrome	AR	OMIM
613497	LIPA	chr10	Wolman Disease / Cholesteryl Ester Storage Disease	AR	OMIM
601567	LMAN1	chr18	Combined Factor V and VIII Deficiency	AR	OMIM
612625	LMBRD1	chr6	Methylmalonic Aciduria and Homocystinuria, Cobalamin F Type	AR	OMIM
613072	LOXHD1	chr18	Deafness, Autosomal Recessive 77	AR	OMIM
609239	LPAR6	chr13	Hypotrichosis 8 / Autosomal Recessive Woolly Hair 1	AR	OMIM
609708	LPL	chr8	Lipoprotein Lipase Deficiency	AR_AD	OMIM
607544	LRPPRC	chr2	Leigh Syndrome, French-Canadian Type	AR	OMIM
606897	LYST	chr1	Chediak-Higashi Syndrome	AR	OMIM
609458	MAN2B1	chr19	Alpha-Mannosidosis	AR	OMIM
609489	MANBA	chr4	Beta-Mannosidosis	AR	OMIM
610550	MAT1A	chr10	Methionine Adenosyltransferase I/III Deficiency	AR_AD	OMIM
609010	MCCC1	chr3	3-Methylcrotonyl-CoA Carboxylase Deficiency	AR	OMIM
609014	MCCC2	chr5	3-Methylcrotonyl-CoA Carboxylase Deficiency	AR	OMIM
608419	MCEE	chr2	Methylmalonyl-CoA Epimerase Deficiency	AR	OMIM
605248	MCOLN1	chr19	Mucolipidosis IV	AR_AD	OMIM
300005	MECP2	chrX	MECP2 Duplication Syndrome	XL	OMIM
603810	MED17	chr11	Infantile Cerebral and Cerebellar Atrophy	AR	OMIM
608107	MEFV	chr16	Familial Mediterranean Fever	AR_AD	OMIM
605195	MESP2	chr15	Spondylothoracic Dysostosis	AR	OMIM
611124	MFSD8	chr4	Neuronal Ceroid-Lipofuscinosis	AR	OMIM
609883	MKS1	chr17	Meckel-Gruber Syndrome 1 / Bardet-Biedl Syndrome 13	AR	OMIM
605908	MLC1	chr22	Megalencephalic Leukoencephalopathy with Subcortical Cysts	AR	OMIM
606761	MLYCD	chr16	Malonyl-CoA Decarboxylase Deficiency	AR	OMIM
607481	MMAA	chr4	Methylmalonic Acidemia	AR	OMIM
607568	MMAB	chr12	Methylmalonic Acidemia	AR	OMIM
609831	MMACHC	chr1	Methylmalonic Aciduria and Homocystinuria, Cobalamin C Type	AR	OMIM
611935	MMADHC	chr2	Methylmalonic Aciduria and Homocystinuria, Cobalamin D Type	AR	OMIM
603707	MOCS1	chr6	Molybdenum Cofactor Deficiency A	AR	OMIM
154550	MPI	chr15	Congenital Disorder of Glycosylation, Type Ib	AR	OMIM
159530	MPL	chr1	Congenital Amegakaryocytic Thrombocytopenia	AR_AD	OMIM
137960	MPV17	chr2	Mitochondrial DNA Depletion Syndrome 6 / Navajo Neurohepatopathy	AR	OMIM
600814	MRE11	chr11	Ataxia-Telangiectasia-like Disorder 1	AR	OMIM
607093	MTHFR	chr1	Homocystinuria Due to MTHFR Deficiency	AR_AD	OMIM
300415	MTM1	chrX	Myotubular Myopathy 1 (X-linked)	XLR	OMIM
156570	MTR	chr1	Homocystinuria-Megaloblastic Anemia, Cobalamin G Type	AR	OMIM
602568	MTRR	chr5	* Homocystinuria, cblE Type	AR	OMIM
157147	MTTP	chr4	Abetalipoproteinemia	AR	OMIM
609058	MMUT	chr6	Methylmalonic Acidemia	AR	OMIM
602666	MYO15A	chr17	Deafness, Autosomal Recessive 3	AR	OMIM
276903	MYO7A	chr11	Usher Syndrome, Type IB	AR_AD	OMIM
609701	NAGLU	chr17	Mucopolysaccharidosis Type IIIB	AR_AD	OMIM
608300	NAGS	chr17	N-Acetylglutamate Synthase Deficiency	AR	OMIM
614169	NBEAL2	chr3	Gray Platelet Syndrome	AR	OMIM
602667	NBN	chr8	Nijmegen Breakage Syndrome	AR	OMIM
605262	NDRG1	chr8	Charcot-Marie-Tooth Disease, Type 4D	AR	OMIM
612638	NDUFA11	chr19	Mitochondrial Complex I Deficiency	AR	OMIM
609653	NDUFAF2	chr5	Mitochondrial Complex I Deficiency / Leigh Syndrome	AR	OMIM
612360	NDUFAF5	chr20	Mitochondrial Complex I Deficiency	AR	OMIM
602694	NDUFS4	chr5	Mitochondrial Complex I Deficiency / Leigh Syndrome	AR	OMIM
603848	NDUFS6	chr5	Mitochondrial Complex I Deficiency	AR	OMIM
601825	NDUFS7	chr19	Leigh Syndrome	AR	OMIM
161015	NDUFV1	chr11	Mitochondrial Complex I Deficiency	AR	OMIM
161650	NEB	chr2	Nemaline Myopathy 2	AR	OMIM
608272	NEU1	chr6	Sialidosis, Type I and Type II	AR	OMIM
610661	NGLY1	chr3	Congenital Disorder of Deglycosylation	AR	OMIM
607623	NPC1	chr18	Niemann-Pick Disease, Type C	AR	OMIM
601015	NPC2	chr14	Niemann-Pick Disease, Type C	AR	OMIM
607100	NPHP1	chr2	Joubert Syndrome 4 / Senior-Loken Syndrome 1 / Juvenile Nephronophthisis 1	AR	OMIM
602716	NPHS1	chr19	Nephrotic Syndrome / Congenital Finnish Nephrosis	AR	OMIM
604766	NPHS2	chr1	Nephrotic Syndrome / Steroid-Resistant Nephrotic Syndrome	AR	OMIM
300473	NR0B1	chrX	Congenital Adrenal Hypoplasia (X-linked)	XLR	OMIM
604485	NR2E3	chr15	Enhanced S-Cone Syndrome	AR_AD	OMIM
191315	NTRK1	chr1	Congenital Insensitivity to Pain with Anhidrosis	AR	OMIM
613349	OAT	chr10	Ornithine Aminotransferase Deficiency	AR	OMIM
300535	OCRL	chrX	Lowe Syndrome (X-linked)	XLR	OMIM
606580	OPA3	chr19	3-Methylglutaconic Aciduria, Type III / Optic Atrophy 3, with Cataract	AR_AD	OMIM
300461	OTC	chrX	Ornithine Transcarbomylase Deficiency (X-linked)	XL	OMIM
603681	OTOF	chr2	Deafness, Autosomal Recessive 9	AR	OMIM
612349	PAH	chr12	Phenylalanine Hydroxylase Deficiency	AR	OMIM
608786	PC	chr11	Pyruvate Carboxylase Deficiency	AR	OMIM
126090	PCBD1	chr10	BH4-Deficient Hyperphenylalaninemia D	AR	OMIM
232000	PCCA	chr13	Propionic Acidemia	AR	OMIM
232050	PCCB	chr3	Propionic Acidemia	AR	OMIM
605514	PCDH15	chr10	Usher Syndrome, Type IF	AR	OMIM
300502	PDHA1	chrX	Pyruvate Dehydrogenase E1-Alpha Deficiency (X-linked)	XLD	OMIM
179060	PDHB	chr3	Pyruvate Dehydrogenase E1-Beta Deficiency	AR	OMIM
613230	PEPD	chr19	Prolidase Deficiency	AR	OMIM
614770	PET100	chr19	Mitochondrial Complex IV Deficiency	AR	OMIM
602136	PEX1	chr7	Zellweger Syndrome Spectrum	AR	OMIM
602859	PEX10	chr1	Zellweger Syndrome Spectrum	AR	OMIM
601758	PEX12	chr17	Peroxisome Biogenesis Disorder 3A and 3B	AR	OMIM
170993	PEX2	chr8	Zellweger Syndrome Spectrum	AR	OMIM
608666	PEX26	chr22	Peroxisome Biogenesis Disorder 7A and 7B	AR	OMIM
601498	PEX6	chr6	Zellweger Syndrome Spectrum	AR_AD	OMIM
601757	PEX7	chr6	Rhizomelic Chondrodysplasia Punctata, Type 1	AR	OMIM
610681	PFKM	chr12	Glycogen Storage Disease, Type VII	AR	OMIM
606879	PHGDH	chr1	3-Phosphoglycerate Dehydrogenase Deficiency	AR	OMIM
172490	PHKB	chr16	Glycogen Storage Disease, Type IXb	AR	OMIM
606097	PIGN	chr18	Multiple Congenital Anomalies-Hypotonia-Seizures Syndrome 1	AR	OMIM
606102	PIP5K1C	chr19	Lethal Congenital Contracture Syndrome 3	AR	OMIM
610219	PJVK	chr2	Deafness, Autosomal Recessive 59	AR	OMIM
606702	PKHD1	chr6	Polycystic Kidney Disease, Autosomal Recessive	AR	OMIM
603604	PLA2G6	chr22	Infantile Neuroaxonal Dystrophy 1 and Other PLA2G6-related Disorders	AR	OMIM
603873	PLAA	chr9	Neurodevelopmental Disorder with Progressive Microcephaly, Spasticity, and Brain Anomalies	AR	OMIM
153454	PLOD1	chr1	Ehlers-Danlos Syndrome, Type VI	AR	OMIM
601785	PMM2	chr16	Congenital Disorder of Glycosylation, Type Ia	AR	OMIM
603287	PNPO	chr17	Pyridoxamine 5’-Phosphate Oxidase Deficiency	AR	OMIM
614783	POC1A	chr3	Short Stature, Onychodysplasia, Facial Dysmorphism, and Hypotrichosis	AR	OMIM
174763	POLG	chr15	Mitochondrial DNA Depletion Syndrome 4A and 4B and Other POLG-related Disorders	AR_AD	OMIM
603968	POLH	chr6	Xeroderma Pigmentosum	AR	OMIM
606822	POMGNT1	chr1	Muscle-Eye-Brain Disease and Other POMGNT1-Related Congenital Muscular Dystrophy-Dystroglycanopathies	AR	OMIM
124015	POR	chr7	Antley-Bixler Syndrome	AR	OMIM
173110	POU1F1	chr3	Combined Pituitary Hormone Deficiency 1	AR_AD	OMIM
600722	PPT1	chr1	Neuronal Ceroid-Lipofuscinosis	AR	OMIM
610598	PRCD	chr17	Retinitis Pigmentosa 36	AR	OMIM
608500	PRICKLE1	chr12	Progressive Myoclonic Epilepsy, Type 1B	AR	OMIM
601538	PROP1	chr5	Combined Pituitary Hormone Deficiency 2	AR	OMIM
311850	PRPS1	chrX	Charcot-Marie-Tooth Disease, Type 5 / Arts Syndrome (X-linked)	XLR_XLR	OMIM
176801	PSAP	chr10	Combined SAP Deficiency	AR_AD	OMIM
151460	PTPRC	chr1	Severe Combined Immunodeficiency	AR	OMIM
612719	PTS	chr11	6-Pyruvoyl-Tetrahydropterin Synthase Deficiency	AR	OMIM
608109	PUS1	chr12	Mitochondrial Myopathy and Sideroblastic Anemia 1	AR	OMIM
613741	PYGL	chr14	Glycogen Storage Disease, Type VI	AR	OMIM
608455	PYGM	chr11	Glycogen Storage Disease, Type V	AR	OMIM
612676	QDPR	chr4	BH4-Deficient Hyperphenylalaninemia C	AR	OMIM
606144	RAB23	chr6	Carpenter Syndrome	AR	OMIM
179615	RAG1	chr11	Omenn Syndrome and Other RAG1-related Disorders	AR	OMIM
179616	RAG2	chr11	Omenn Syndrome	AR	OMIM
601592	RAPSN	chr11	Congenital Myasthenic Syndrome	AR	OMIM
611524	RARS2	chr6	Pontocerebellar Hypoplasia, Type 6	AR	OMIM
608830	RDH12	chr14	Leber Congenital Amaurosis 13	AR_AD	OMIM
601617	RDH5	chr12	Fundus Albipunctatus	AR_AD	OMIM
180297	RHAG	chr6	Rh Deficiency Syndrome	AR_AD	OMIM
180090	RLBP1	chr15	Retinitis Punctata Albescens and Other RLBP1-related Ocular Disorders	AR_AD	OMIM
157660	RMRP	chr9	Cartilage-Hair Hypoplasia	AR	OMIM
610330	RNASEH2C	chr11	Aicardi-Goutieres Syndrome	AR	OMIM
614574	ROGDI	chr16	Kohlschutter-Tonz Syndrome	AR	OMIM
180069	RPE65	chr1	Leber Congenital Amaurosis 2 / Retinitis Pigmentosa 20	AR_AD	OMIM
610937	RPGRIP1L	chr16	Joubert Syndrome 7 / Meckel Syndrome 5 / COACH Syndrome	AR	OMIM
300839	RS1	chrX	X-Linked Juvenile Retinoschisis	XLR	OMIM
612648	RSPH9	chr6	Primary Ciliary Dyskinesia	AR	OMIM
608833	RTEL1	chr20	Dyskeratosis Congenita	AR_AD	OMIM
180901	RYR1	chr19	Malignant Hyperthermia and Other RYR1-related Myopathies	AR_AD	OMIM
604490	SACS	chr13	Autosomal Recessive Spastic Ataxia of Charlevoix-Saguenay	AR	OMIM
606754	SAMHD1	chr20	Aicardi-Goutières Syndrome	AR_AD	OMIM
612804	SARS2	chr19	Hyperuricemia, Pulmonary Hypertension, Renal Failure, and Alkalosis	AR	OMIM
607444	SBDS	chr7	Shwachman-Diamond Syndrome	AR	OMIM
603644	SCO1	chr17	Mitochondrial Complex IV Deficiency	AR	OMIM
610512	SEC23B	chr20	Congenital Dyserythropoietic Anemia Type 2	AR_AD	OMIM
613009	SEPSECS	chr4	Progressive Cerebello-Cerebral Atrophy	AR	OMIM
107400	SERPINA1	chr14	Alpha-1 Antitrypsin Deficiency	AR	OMIM
600119	SGCA	chr17	Limb-Girdle Muscular Dystrophy, Type 2D	AR	OMIM
600900	SGCB	chr4	Limb-Girdle Muscular Dystrophy, Type 2E	AR	OMIM
601411	SGCD	chr5	Limb-Girdle Muscular Dystrophy, Type 2F	AR	OMIM
608896	SGCG	chr13	Limb-Girdle Muscular Dystrophy, Type 2C	AR	OMIM
605270	SGSH	chr17	Mucopolysaccharidosis Type IIIA	AR	OMIM
600968	SLC12A3	chr16	Gitelman Syndrome	AR	OMIM
604878	SLC12A6	chr15	Andermann Syndrome	AR_AD	OMIM
604322	SLC17A5	chr6	Salla Disease	AR	OMIM
603941	SLC19A2	chr1	Thiamine-Responsive Megaloblastic Anemia Syndrome	AR	OMIM
600229	SLC1A4	chr2	Spastic Tetraplegia, Thin Corpus Callosum, and Progressive Microcephaly	AR	OMIM
603377	SLC22A5	chr5	Primary Carnitine Deficiency	AR	OMIM
603859	SLC25A13	chr7	Citrin Deficiency	AR	OMIM
603861	SLC25A15	chr13	Hyperornithinemia-Hyperammonemia-Homocitrullinuria Syndrome	AR	OMIM
613698	SLC25A20	chr3	Carnitine Acylcarnitine Translocase Deficiency	AR	OMIM
606718	SLC26A2	chr5	Sulfate Transporter-Related Osteochondrodysplasia	AR	OMIM
126650	SLC26A3	chr7	Congenital Secretory Chloride Diarrhea 1	AR	OMIM
605646	SLC26A4	chr7	Pendred Syndrome	AR	OMIM
138160	SLC2A2	chr3	Fanconi-Bickel Syndrome	AR_AD	OMIM
609826	SLC34A3	chr9	Hypophosphatemic Rickets with Hypercalciuria	AR	OMIM
605632	SLC35A3	chr1	Arthrogryposis, Mental Retardation, and Seizures	AR	OMIM
602671	SLC37A4	chr11	Glycogen Storage Disease, Type Ib	AR_AD	OMIM
607059	SLC39A4	chr8	Acrodermatitis Enteropathica	AR	OMIM
104614	SLC3A1	chr2	Cystinuria	AR_AD	OMIM
606202	SLC45A2	chr5	Oculocutaneous Albinism, Type IV	AR	OMIM
109270	SLC4A1	chr17	Distal Renal Tubular Acidosis and Other SLC4A1-related Disorders	AR_AD	OMIM
610206	SLC4A11	chr20	Corneal Dystrophy and Perceptive Deafness	AR	OMIM
601843	SLC5A5	chr19	Thyroid Dyshormonogenesis 1	AR	OMIM
300036	SLC6A8	chrX	Cerebral Creatine Deficiency Syndrome 1 (X-linked)	XLR	OMIM
603593	SLC7A7	chr14	Lysinuric Protein Intolerance	AR	OMIM
606622	SMARCAL1	chr2	Schimke Immunoosseous Dysplasia	AR	OMIM
600354	SMN1	chr5	Spinal Muscular Atrophy (Includes Enhanced SMA Testing	AR	OMIM
607608	SMPD1	chr11	Niemann-Pick Disease, Type A/B	AR	OMIM
604202	SNAP29	chr22	Cerebral Dysgenesis, Neuropathy, Ichthyosis, and Palmoplantar Keratoderma Syndrome	AR	OMIM
614780	SNX10	chr7	Osteopetrosis 8	AR	OMIM
182125	SPR	chr2	Sepiapterin Reductase Deficiency	AR_AD	OMIM
607306	SRD5A2	chr2	Pseudovaginal Perineoscrotal Hypospadias	AR	OMIM
604402	ST3GAL5	chr2	Salt and Pepper Developmental Regression Syndrome	AR	OMIM
600617	STAR	chr8	Lipoid Adrenal Hyperplasia	AR	OMIM
603921	SUCLA2	chr13	Mitochondrial DNA Depletion Syndrome 5	AR	OMIM
607939	SUMF1	chr3	Multiple Sulfatase Deficiency	AR	OMIM
185620	SURF1	chr9	Leigh Syndrome	AR	OMIM
615535	SYNE4	chr19	Deafness, Autosomal Recessive 76	AR	OMIM
613018	TAT	chr16	Tyrosinemia, Type II	AR	OMIM
300394	TAFAZZIN	chrX	Barth Syndrome (X-linked)	XLR	OMIM
604934	TBCE	chr1	Hypoparathyroidism-Retardation-Dysmorphic Syndrome	AR	OMIM
604614	TBX19	chr1	Adrenocorticotropic Hormone Deficiency	AR	OMIM
604592	TCIRG1	chr11	Osteopetrosis 1	AR	OMIM
615000	TECPR2	chr14	Hereditary Spastic Paraparesis 49	AR	OMIM
604720	TFR2	chr7	Hemochromatosis, Type 3	AR	OMIM
188450	TG	chr8	Thyroid Dyshormonogenesis 3	AR	OMIM
190195	TGM1	chr14	Lamellar Ichthyosis, Type 1	AR	OMIM
191290	TH	chr11	Segawa Syndrome	AR	OMIM
188250	TK2	chr16	Mitochondrial DNA Depletion Syndrome 2	AR	OMIM
606706	TMC1	chr9	Deafness, Autosomal Recessive 7	AR_AD	OMIM
613277	TMEM216	chr11	Joubert Syndrome 2	AR	OMIM
605511	TMPRSS3	chr21	Deafness, Autosomal Recessive 8/10	AR	OMIM
606765	TPO	chr2	Thyroid Dyshormonogenesis 2A	AR	OMIM
607998	TPP1	chr11	Neuronal Ceroid-Lipofuscinosis	AR	OMIM
606609	TREX1	chr3	Aicardi-Goutieres Syndrome	AR_AD	OMIM
188545	TRHR	chr8	Generalized Thyrotropin-releasing Hormone Resistance	AR	OMIM
602290	TRIM32	chr9	Limb-Girdle Muscular Dystrophy, Type 2H	AR	OMIM
605073	TRIM37	chr17	Mulibrey Nanism	AR	OMIM
610230	TRMU	chr22	Acute Infantile Liver Failure	AR	OMIM
607009	TRPM6	chr9	Hypomagnesemia 1	AR	OMIM
608755	TSEN54	chr17	Pontocerebellar Hypoplasia, Type 2A and Type 4	AR	OMIM
604723	TSFM	chr12	Combined Oxidative Phosphorylation Deficiency 3	AR	OMIM
188540	TSHB	chr1	Congenital Nongoitrous Hypothryoidism 4	AR	OMIM
603372	TSHR	chr14	Congenital Nongoitrous Hypothryoidism 1	AR_AD	OMIM
614589	SKIC3	chr5	Trichohepatoenteric Syndrome 1	AR	OMIM
600415	TTPA	chr8	Ataxia with Isolated Vitamin E Deficiency	AR	OMIM
602280	TULP1	chr6	Leber Congenital Amaurosis 15 / Retinitis Pigmentosa 14	AR	OMIM
131222	TYMP	chr22	Myoneurogastrointestinal Encephalopathy	AR	OMIM
606933	TYR	chr11	Oculocutaneous Albinism, Type IA / IB	AR_AD	OMIM
115501	TYRP1	chr9	Oculocutaneous Albinism, Type III	AR	OMIM
601623	UBE3A	chr15	Angelman Syndrome	AD	OMIM
191740	UGT1A1	chr2	Crigler-Najjar Syndrome, Types 1 & 2 / Gilbert Syndrome	AR_AD	OMIM
605242	USH1C	chr11	Usher Syndrome, Type IC	AR	OMIM
608400	USH2A	chr1	Usher Syndrome, Type IIA	AR	OMIM
601769	VDR	chr12	Vitamin D-Resistant Rickets, Type IIA	AR	OMIM
608549	VPS11	chr11	Hypomyelinating Leukodystrophy 12	AR	OMIM
605978	VPS13A	chr9	Choreoacanthocytosis	AR	OMIM
607817	VPS13B	chr8	Cohen Syndrome	AR	OMIM
610035	VPS45	chr1	Congenital Neutropenia	AR	OMIM
615850	VPS53	chr17	Pontocerebellar Hypoplasia, Type 2E	AR	OMIM
602168	VRK1	chr14	Pontocerebellar Hypoplasia, Type 1A	AR	OMIM
142993	VSX2	chr14	Microphthalmia / Anophthalmia	AR	OMIM
613160	VWF	chr12	Von Willebrand Disease	AR_AD	OMIM
300392	WAS	chrX	Wiskott-Aldrich Syndrome (X-linked)	XLR	OMIM
603400	CCN6	chr6	Progressive Pseudorheumatoid Dysplasia	AR	OMIM
606268	WNT10A	chr2	Odonto-Onycho-Dermal Dysplasia / Schopf-Schulz-Passarge Syndrome	AR_AD	OMIM
604611	WRN	chr8	Werner Syndrome	AR	OMIM
611153	XPA	chr9	Xeroderma Pigmentosum, Group A	AR	OMIM
613208	XPC	chr3	Xeroderma Pigmentosum, Group C	AR	OMIM
612012	ZFYVE26	chr14	Spastic Paraplegia 15	AR	OMIM

## Sheet: S6-Pharmacogenomic List
HGNC ID	Gene	rsID	GrCh38-Co-ordinate
HGNC:2615	CYP2B6	rs2279343	19:41009358
		rs3745274	19:41006936
		rs28399499	19:41012316
		rs3211371	19:41016810
HGNC:2621	CYP2C9	rs1799853	10:94942290
		rs1057910	10:94981296
		rs28371686	10:94981301
		rs28371685	10:94981224
HGNC:2623	CYP2C19	rs4244285	10:94781859
		rs4986893	10:94780653
		rs28399504	10:94762706
		rs56337013	10:94852738
		rs72552267	10:94775453
		rs41291556	10:94775416
		rs17884712	10:94775489
		rs6413438	10:94781858
		rs12248560	10:94761900
HGNC:2625	CYP2D6	rs35742686	22:42128242
		rs3892097	22:42128945
		rs1065852	22:42130692
		rs5030655	22:42129084
		rs5030865	22:42129033
		rs5030656	22:42128176
		rs1065852	22:42130692
		rs5030865	22:42129033
		rs1065852	22:42130692
		rs28371706	22:42129770
		rs28371725	22:42127803
HGNC:2638	CYP3A5	rs776746	7:99672916
		rs10264272	7:99665212
		rs41303343	7:99652770
HGNC:3012	DPYD	rs3918290	1:97450058
		rs55886062	1:97515787
		rs67376798	1:97082391
		rs56038477	1:97573863
HGNC:3542	F5	rs6025	1:169549811
HGNC:23063	NUDT15	rs746071566	13:48037796
		rs116855232	13:48045719
		rs116855232	13:48045719
		rs746071566	13:48037796
		rs746071566	13:48037796
HGNC:10959	SLCO1B1	rs4149056	12:21178615
		rs1800462	6:18143724
		rs1142345	6:18130687
		rs1800460	6:18138997
		rs1142345	6:18130687
HGNC:12530	UGT1A1	rs4148323	2:233760498
		rs35350960	2:233760973
		rs3064744	2:233760245
HGNC:23663	VKORC1	rs9923231	16:31096368
HGNC:12014	TPMT	rs1800462	6:18143724
		rs1142345	6:18130687
		rs1800460	6:18138997
